# Supplementary material for: Distinct Pulmonary Innate and Adaptive Immune Responses during the Initiation and Resolution of Natural and Breakthrough SARS-CoV-2 Infection
Source: Research Square preprint supplement (doi:10.21203/rs.3.rs-7716872/v1), 2025-10-21
Supplement: Supplementary file 1 [file 2bda438d3aeff680f3e03907.xlsx]

## Sheet: 1. Cytokine Score
		Cytokine Score
Cytokine Genes		Cell Type	p Values	Unvaxed mean	Vaxed mean	Compares	Top Unvaxed Genes	Top Vaxed Genes
XCL2		Macrophage	0	-0.00979219	-0.0517667	Unvaxed_A_vs_Vaxed_A	CCL18,CXCL16,TNFSF13,CXCL3,MIF	CCL18,CXCL16,TNFSF13,MIF,INHBA
XCL1		Macrophage	2.34858e-42	-0.0490428	-0.0579155	Unvaxed_R_vs_Vaxed_R	CCL18,CXCL16,TNFSF13,MIF,TGFB1	CCL18,CXCL16,TNFSF13,MIF,INHBA
IL18R1
TNFSF10		CD4	7.34313e-59	0.0664863	0.0398293	Unvaxed_A_vs_Vaxed_A	IL32,CCL5,LTB,CCL4,MIF	IL32,CCL5,LTB,MIF,TGFB1
CXCL3		CD4	0.151133	0.0664677	0.0707462	Unvaxed_R_vs_Vaxed_R	IL32,LTB,CCL5,MIF,TGFB1	IL32,CCL5,LTB,TGFB1,MIF
CXCL2
TNF		CD8	1.80062e-31	0.220451	0.184019	Unvaxed_A_vs_Vaxed_A	CCL5,CCL4,IL32,MIF,TGFB1	CCL5,IL32,CCL4,LTB,MIF
LTB		CD8	2.60158e-06	0.215499	0.192113	Unvaxed_R_vs_Vaxed_R	CCL5,IL32,CCL4,LTB,MIF	CCL5,IL32,CCL4,LTB,TGFB1
INHBA
VEGFB		NK	5.42214e-38	0.229164	0.115033	Unvaxed_A_vs_Vaxed_A	CCL5,CCL4,IL32,XCL2,TGFB1	CCL5,CCL4,XCL1,XCL2,TGFB1
SCYL1		NK	3.96514e-11	0.209655	0.107263	Unvaxed_R_vs_Vaxed_R	CCL5,CCL4,IL32,XCL1,XCL2	CCL5,XCL1,CCL4,IL32,XCL2
IL18
IFNG-AS1		B_cell	0.411203	-0.131021	-0.137189	Unvaxed_A_vs_Vaxed_A	LTB,MIF,TGFB1,IL16,VEGFB	LTB,TGFB1,MIF,VEGFB,IL16
IFNG		B_cell	0.174107	-0.118884	-0.1308	Unvaxed_R_vs_Vaxed_R	LTB,MIF,TGFB1,IL16,VEGFB	LTB,MIF,TGFB1,VEGFB,IL16
SCYL2
TNFSF13B		mDC	0.00130543	0.00302228	-0.0135361	Unvaxed_A_vs_Vaxed_A	CCL17,CXCL16,LTB,MIF,TGFB1	CCL17,LTB,CXCL16,MIF,TGFB1
IL16		mDC	0.0001751	-0.00833803	-0.0289294	Unvaxed_R_vs_Vaxed_R	CCL17,CXCL16,LTB,CCL22,MIF	CCL17,CXCL16,CCL22,TGFB1,MIF
IL32
CCL22		pDC	0.201258	-0.149587	-0.166248	Unvaxed_A_vs_Vaxed_A	LTB,VEGFB,MIF,TGFB1,CCL5	LTB,VEGFB,MIF,TGFB1,TNFSF13
CCL17		pDC	0.724224	-0.129572	-0.137695	Unvaxed_R_vs_Vaxed_R	LTB,VEGFB,TGFB1,MIF,TNFSF13	LTB,VEGFB,TGFB1,MIF,TNFSF13
CXCL16
TNFSF12		Epithelial	2.30367e-15	-0.174167	-0.232177	Unvaxed_A_vs_Vaxed_A	MIF,IL32,CCL5,CCL4,LTB	MIF,CCL18,IL32,CCL5,TNFSF10
TNFSF13		Epithelial	0.000537127	-0.168266	-0.117432	Unvaxed_R_vs_Vaxed_R	MIF,CCL18,CXCL16,TNFSF13,CXCL3	CXCL16,CCL18,MIF,TNFSF13,INHBA
CCL5
CCL18		Plasma	5.85686e-07	-0.108745	-0.153863	Unvaxed_A_vs_Vaxed_A	MIF,IFNG-AS1,CCL5,IL32,CCL4	MIF,IFNG-AS1,CCL5,IL32,TGFB1
CCL3		Plasma	0.703429	-0.164942	-0.15427	Unvaxed_R_vs_Vaxed_R	MIF,IL16,VEGFB,TGFB1,LTB	MIF,IFNG-AS1,VEGFB,TGFB1,SCYL1
CCL4
CCL4L2		Mast	0.268666	-0.144685	-0.169809	Unvaxed_A_vs_Vaxed_A	IL18R1,TGFB1,MIF,TNFSF10,IL18	IL18R1,MIF,TGFB1,IL18,TNFSF10
TGFB1		Mast	0.261594	-0.11825	-0.154277	Unvaxed_R_vs_Vaxed_R	CCL18,CXCL16,MIF,TGFB1,IL18R1	IL18R1,IL18,TNFSF10,TGFB1,MIF
MIF

## Sheet: 2. Inflammation Score
		Inflammation Score
Inflammation Genes		Cell Type	p Values	Unvaxed mean	Vaxed mean	Compares	Top Unvaxed genes	Top Vaxed genes
LCK		Macrophage	0	-0.04	-0.1	Unvaxed_A_vs_Vaxed_A	MARCO,LY6E,EMP3,OLR1,CYBB	MARCO,LY6E,EMP3,OLR1,CYBB
CD48		Macrophage	4.34e-35	-0.08	-0.09	Unvaxed_R_vs_Vaxed_R	MARCO,LY6E,EMP3,OLR1,CYBB	MARCO,LY6E,EMP3,OLR1,CYBB
RGS1
BTG2		CD4	6.41e-82	0.19	0.23	Unvaxed_A_vs_Vaxed_A	CCL5,KLF6,IFITM1,CD69,IL7R	KLF6,CCL5,IFITM1,EMP3,NFKBIA
CD55		CD4	0.0824	0.18	0.17	Unvaxed_R_vs_Vaxed_R	KLF6,IFITM1,EMP3,CCL5,NFKBIA	CCL5,KLF6,IFITM1,EMP3,IL7R
MARCO
NFKB1		CD8	1.35e-36	0.25	0.29	Unvaxed_A_vs_Vaxed_A	CCL5,KLF6,IFITM1,CD69,EMP3	CCL5,KLF6,IFITM1,CD69,EMP3
IL7R		CD8	2.37e-08	0.25	0.22	Unvaxed_R_vs_Vaxed_R	CCL5,KLF6,IFITM1,EMP3,CD69	CCL5,IFITM1,KLF6,EMP3,LCK
IRF1
LCP2		NK	1.86e-05	0.23	0.27	Unvaxed_A_vs_Vaxed_A	CCL5,IFITM1,KLF6,CD69,NFKBIA	CCL5,IFITM1,KLF6,NFKBIA,EMP3
TAPBP		NK	0.142	0.22	0.24	Unvaxed_R_vs_Vaxed_R	CCL5,IFITM1,KLF6,EMP3,NFKBIA	CCL5,IFITM1,KLF6,EMP3,NFKBIA
CDKN1A
SRI		B_cell	1.56e-08	-0.01	0.07	Unvaxed_A_vs_Vaxed_A	KLF6,CD69,EMP3,IFITM1,NFKBIA	KLF6,EMP3,CD69,NFKBIA,ATP2B1
CYBB		B_cell	0.383	-0.02	-0.01	Unvaxed_R_vs_Vaxed_R	EMP3,KLF6,CD69,CD48,BTG2	EMP3,KLF6,ATP2B1,LYN,IFITM1
TIMP1
LYN		mDC	3.28e-20	0.06	0.13	Unvaxed_A_vs_Vaxed_A	KLF6,EMP3,MARCO,NFKBIA,CDKN1A	KLF6,NFKBIA,EMP3,CDKN1A,LY6E
LY6E		mDC	0.91	0.09	0.09	Unvaxed_R_vs_Vaxed_R	KLF6,EMP3,NFKBIA,CDKN1A,LY6E	KLF6,EMP3,CDKN1A,NFKBIA,TIMP1
IFITM1
IRF7		pDC	0.639	0.04	0.05	Unvaxed_A_vs_Vaxed_A	IRF7,KLF6,RGS1,SELENOS,BST2	IRF7,KLF6,EMP3,SELENOS,BST2
RHOG		pDC	0.344	0.08	0.06	Unvaxed_R_vs_Vaxed_R	IRF7,KLF6,EMP3,CDKN1A,BST2	IRF7,KLF6,EMP3,CDKN1A,LYN
KLF6
CD69		Epithelial	5.27e-12	-0.21	-0.28	Unvaxed_A_vs_Vaxed_A	SRI,CCL5,LY6E,KLF6,NFKBIA	SRI,LY6E,KLF6,IFITM1,NFKBIA
OLR1		Epithelial	2.23e-05	-0.24	-0.17	Unvaxed_R_vs_Vaxed_R	MARCO,SRI,LY6E,EMP3,KLF6	MARCO,LY6E,OLR1,SRI,PLAUR
ATP2B1
NFKBIA		Plasma	0.356	-0.01	0	Unvaxed_A_vs_Vaxed_A	KLF6,SELENOS,NFKBIA,CCL5,BTG2	KLF6,SELENOS,BTG2,EMP3,IFITM1
SELENOS		Plasma	0.00294	0.09	-0.05	Unvaxed_R_vs_Vaxed_R	IFITM1,IRF7,LY6E,KLF6,EMP3	BTG2,SELENOS,NFKBIA,EMP3,TIMP1
CCL5
BST2		Mast	0.0144	-0.03	0.06	Unvaxed_A_vs_Vaxed_A	EMP3,KLF6,LCP2,TIMP1,LYN	EMP3,KLF6,LCP2,LYN,TIMP1
PLAUR		Mast	0.42	0.02	-0.02	Unvaxed_R_vs_Vaxed_R	EMP3,MARCO,KLF6,LY6E,LCP2	EMP3,KLF6,BTG2,LCP2,LYN
EMP3

## Sheet: 3. Interferon Score
		Interferon Score
Interferon Stimulated Genes		Cell_Type	pValues	Unvaxed_mean	Vaxed_mean	Compares	Top_Unvaxed_genes	Top_Vaxed_genes
ISG15		Macrophage	3.18029e-47	-0.130927	-0.118637	Unvaxed_A_vs_Vaxed_A	IFI27,IFITM3,MYD88,ISG15,SP100	IFI27,IFITM3,ISG15,MX1,MYD88
JAK1		Macrophage	4.37078e-287	-0.136975	-0.111633	Unvaxed_R_vs_Vaxed_R	IFI27,IFITM3,MYD88,ISG15,MX1	IFI27,IFITM3,ISG15,MX1,MYD88
TANK
IFIH1		CD4	2.93348e-121	0.0256505	0.0655766	Unvaxed_A_vs_Vaxed_A	IFITM1,IFITM2,JAK1,SP100,STAT1	IFITM1,IFITM2,JAK1,SP100,ISG15
STAT1		CD4	4.66889e-26	0.00437761	0.0359797	Unvaxed_R_vs_Vaxed_R	IFITM1,IFITM2,JAK1,SP100,TANK	IFITM1,IFITM2,JAK1,SP100,TANK
SP100
HDAC4		CD8	2.0224e-29	0.0240647	0.0564814	Unvaxed_A_vs_Vaxed_A	IFITM1,IFITM2,JAK1,SP100,IFITM3	IFITM1,IFITM2,JAK1,SP100,ISG15
AZI2		CD8	6.97224e-10	-0.000547648	0.0284547	Unvaxed_R_vs_Vaxed_R	IFITM1,IFITM2,JAK1,SP100,TANK	IFITM1,IFITM2,JAK1,SP100,ISG15
MYD88
SETD2		NK	1.06417e-37	0.0393676	0.14083	Unvaxed_A_vs_Vaxed_A	IFITM1,IFITM2,JAK1,SP100,IFITM3	IFITM1,IFITM2,IFITM3,JAK1,ISG15
TRIM56		NK	8.48409e-13	0.0505095	0.141721	Unvaxed_R_vs_Vaxed_R	IFITM1,IFITM2,IFITM3,JAK1,SP100	IFITM1,IFITM2,IFITM3,JAK1,ISG15
IRAK1
IFITM2		B_cell	0.742807	0.0310285	0.0345149	Unvaxed_A_vs_Vaxed_A	SP100,IFITM1,JAK1,IFITM2,STAT1	IFITM1,SP100,JAK1,IFITM2,IRF7
IFITM1		B_cell	0.0800462	0.0246842	0.0476349	Unvaxed_R_vs_Vaxed_R	JAK1,SP100,IFITM1,MX1,IFITM2	SP100,JAK1,IFITM1,IFITM2,IRF7
IFITM3
IRF7		mDC	1.13063e-31	-0.0874731	-0.0238652	Unvaxed_A_vs_Vaxed_A	IFITM3,JAK1,IFITM2,MYD88,SP100	IFITM3,IFITM2,IFITM1,JAK1,IFI27
SMPD1		mDC	3.37983e-08	-0.0765643	-0.0413839	Unvaxed_R_vs_Vaxed_R	IFITM3,JAK1,IFITM2,IFI27,MYD88	IFITM3,IFITM2,JAK1,ISG15,IRF7
IFIT1
STAT2		pDC	0.00183365	-0.00585469	0.047351	Unvaxed_A_vs_Vaxed_A	IRF7,MX1,STAT1,JAK1,IFITM2	IRF7,MX1,STAT1,JAK1,IFITM2
SHMT2		pDC	0.676469	0.0625616	0.0493084	Unvaxed_R_vs_Vaxed_R	IRF7,STAT1,MX1,IFITM2,SP100	IRF7,MX1,STAT1,IFITM2,JAK1
TBK1
OAS2		Epithelial	0.698403	-0.0223971	-0.0247129	Unvaxed_A_vs_Vaxed_A	IFI27,IFITM3,IFITM1,SP100,JAK1	IFI27,IFITM3,IFITM1,TRIM56,SETD2
IFI27		Epithelial	5.91121e-07	-0.097926	-0.0445439	Unvaxed_R_vs_Vaxed_R	IFI27,IFITM3,JAK1,SP100,ISG15	IFI27,IFITM3,ISG15,MX1,STAT1
TRAF3
SIN3A		Plasma	4.19281e-06	-0.0398969	0.0249107	Unvaxed_A_vs_Vaxed_A	IFITM1,IRF7,STAT1,SP100,SHMT2	ISG15,IFITM1,IRF7,JAK1,MX1
MAVS		Plasma	0.0043908	0.154822	-0.00512312	Unvaxed_R_vs_Vaxed_R	IFITM1,IRF7,ISG15,SHMT2,MX1	SHMT2,IRF7,IFITM1,SP100,STAT2
TYK2
IRF3		Mast	0.0228442	-0.0507808	0.00867361	Unvaxed_A_vs_Vaxed_A	IFITM2,IFITM3,SP100,SETD2,STAT1	IFITM3,IFITM2,SP100,STAT1,SETD2
IFNAR1		Mast	0.0260164	-0.0849147	-0.000813466	Unvaxed_R_vs_Vaxed_R	IFITM3,IFITM2,SP100,SETD2,JAK1	IFITM3,IFITM2,SP100,HDAC4,JAK1
MX1

## Sheet: 4. HLA 1 and II Scores
	HLA I							HLA II
HLA Class I Genes	Cell_Type	pValue	Unvaxed_Mean	Vaxed_Mean	Compares		HLA Class II Genes	Cell_Type	pValues	Unvaxed_Mean	Vaxed_Mean	Compares
HLA-F	Macrophage	2.16e-48	1.2	1.23	Unvaxed_A_vs_Vaxed_A		HLA-DRA	Macrophage	5.48e-117	1.17	1.12	Unvaxed_A_vs_Vaxed_A
HLA-G	Macrophage	3.91e-27	1.23	1.25	Unvaxed_R_vs_Vaxed_R		HLA-DRB5	Macrophage	0	1.19	1.12	Unvaxed_R_vs_Vaxed_R
HLA-A							HLA-DRB1
HLA-E	CD4	4.14e-16	1.71	1.74	Unvaxed_A_vs_Vaxed_A		HLA-DQA1	CD4	9.88e-12	-0.32	-0.3	Unvaxed_A_vs_Vaxed_A
HLA-C	CD4	0.00277	1.77	1.8	Unvaxed_R_vs_Vaxed_R		HLA-DQB1	CD4	1.6e-46	-0.27	-0.17	Unvaxed_R_vs_Vaxed_R
HLA-B							HLA-DQB1-AS1
	CD8	0.0022	1.87	1.89	Unvaxed_A_vs_Vaxed_A		HLA-DQA2	CD8	2.21e-24	-0.09	-0.16	Unvaxed_A_vs_Vaxed_A
	CD8	0.425	1.88	1.89	Unvaxed_R_vs_Vaxed_R		HLA-DQB2	CD8	1e-35	-0.19	-0.05	Unvaxed_R_vs_Vaxed_R
							HLA-DOB
	NK	3.95e-11	1.69	1.58	Unvaxed_A_vs_Vaxed_A		HLA-DMB	NK	3.3e-15	-0.15	-0.27	Unvaxed_A_vs_Vaxed_A
	NK	0.333	1.53	1.56	Unvaxed_R_vs_Vaxed_R		HLA-DMA	NK	0.959	-0.3	-0.3	Unvaxed_R_vs_Vaxed_R
							HLA-DOA
	B_cell	0.0142	1.69	1.64	Unvaxed_A_vs_Vaxed_A		HLA-DPA1	B_cell	0.434	1.23	1.26	Unvaxed_A_vs_Vaxed_A
	B_cell	0.72	1.66	1.67	Unvaxed_R_vs_Vaxed_R		HLA-DPB1	B_cell	3.21e-05	1.13	1.27	Unvaxed_R_vs_Vaxed_R
	mDC	0.605	1.32	1.32	Unvaxed_A_vs_Vaxed_A			mDC	6.01e-17	1.66	1.79	Unvaxed_A_vs_Vaxed_A
	mDC	0.929	1.34	1.34	Unvaxed_R_vs_Vaxed_R			mDC	8.83e-10	1.7	1.82	Unvaxed_R_vs_Vaxed_R
	pDC	0.103	1.29	1.36	Unvaxed_A_vs_Vaxed_A			pDC	0.0128	0.98	1.09	Unvaxed_A_vs_Vaxed_A
	pDC	0.000738	1.46	1.17	Unvaxed_R_vs_Vaxed_R			pDC	0.191	1.17	1.06	Unvaxed_R_vs_Vaxed_R
	Epithelial	3.94e-10	0.97	0.83	Unvaxed_A_vs_Vaxed_A			Epithelial	0.000272	0.15	0.07	Unvaxed_A_vs_Vaxed_A
	Epithelial	3.59e-10	0.78	1	Unvaxed_R_vs_Vaxed_R			Epithelial	0.000144	0.37	0.62	Unvaxed_R_vs_Vaxed_R
	Plasma	0.000453	1.2	1.31	Unvaxed_A_vs_Vaxed_A			Plasma	0.596	-0.22	-0.21	Unvaxed_A_vs_Vaxed_A
	Plasma	0.0532	1.61	1.06	Unvaxed_R_vs_Vaxed_R			Plasma	0.576	-0.14	-0.19	Unvaxed_R_vs_Vaxed_R
	Mast	0.34	0.61	0.72	Unvaxed_A_vs_Vaxed_A			Mast	0.485	-0.46	-0.48	Unvaxed_A_vs_Vaxed_A
	Mast	0.108	0.81	0.57	Unvaxed_R_vs_Vaxed_R			Mast	0.000375	0.2	-0.34	Unvaxed_R_vs_Vaxed_R
