# Supplementary material for: Distinct Pulmonary Innate and Adaptive Immune Responses during the Initiation and Resolution of Natural and Breakthrough SARS-CoV-2 Infection
Source: Research Square preprint supplement (doi:10.21203/rs.3.rs-7716872/v1), 2025-10-21
Supplement: Supplementary file 2 [file 4a574b1b3901614678bd1634.xlsx]

## Sheet: 1. NK BAL cells DEG DEP 
Acute																		Recovery
Gene: Up in Unvaxed				Protein: Up in Unvaxed					Gene:Up in Vaxed				Protein:Up in Vaxed					Gene:Up in Unvaxed				Protein:Up in Unvaxed					Gene:Up in Vaxed				Protein:Up in Vaxed
Symbol	Avg_Log2FC	p_Val_Adj		ID	Symbol	Avg_Log2FC	p_Val_Adj		Symbol	Avg_Log2FC	p_Val_Adj		ID	Symbol	Avg_Log2FC	p_Val_Adj		Symbol	Avg_Log2FC	p_Val_Adj		ID	Symbol	Avg_Log2FC	p_Val_Adj		Symbol	Avg_Log2FC	p_Val_Adj		ID	Symbol	Avg_Log2FC	p_Val_Adj
IFNG	2.06283	9.9534e-31		ITGA1	Hu.CD49a	0.966404	3.52e-56		CAPG	-1.14959	2.69374e-33		PTPRC	Hu.CD45RA	-0.598407	2.44e-32		PPDPF	0.648695	1.26207e-05		ITGA1	Hu.CD49a	0.419465	0.00132348		IFITM3	-1.00855	5.39248e-10		PTPRC	Hu.CD45RA	-0.515006	1.44921e-09
HLA-DQB1	1.97083	1.25734e-22		CCR5	Hu.CD195	0.443377	3.54e-43		FXYD5	-0.715642	8.12621e-29		PECAM1	Hu.CD62L	-1.01829	1.58e-14		RASAL2	2.00159	2.64219e-05		ITGAE	Hu.CD103	0.446168	0.0138062		ESYT2	-1.23772	0.000231746		CD2	Hu.CD2	-0.697511	6.80666e-09
IGFBP2	1.91763	1.85817e-24		SLAMF7	Hu.CD319	0.67014	2.92e-39		S100A11	-0.637889	1.26917e-20		PECAM1	Hu.CD31	-0.624449	8.53e-12		S100A6	0.609949	3.64442e-05		SLAMF7	Hu.CD319	0.38548	0.0413135		AHNAK	-0.62512	0.00652899		CD38	Hu.CD38-HIT2	-0.324916	0.00043975
CCL4L2	1.62917	7.97149e-10		LAG3	Hu.CD223	0.462346	1.23e-33		XCL1	-0.669608	7.18403e-20		ITGAX	Hu.CD11c	-0.546607	1.74e-07		KRT86	1.28581	0.000127665							LINC00996	-1.08536	0.0115784		SELL	Hu.CD62L	-0.87623	0.00219571
ADGRG1	1.42079	1.874e-15		ITGB1	Hu.CD29	0.398447	4.9e-28		TAGLN2	-0.660085	1.95846e-19							CCL4	0.921701	0.000368207							LMNA	-1.3408	0.0116487		CD44	HuMs.CD44	-0.332338	0.0045062
CPNE7	1.41464	1.53867e-14		ITGAE	Hu.CD103	1.12827	3.51e-26		ISG15	-1.68029	7.63556e-17							CD3E	0.789533	0.00342871							ETV6	-1.03896	0.01458		ITGAX	Hu.CD11c	-0.785659	0.0182824
IL32	1.38623	9.63253e-38		KLRD1	Hu.CD94	0.350338	1.13e-22		TNFRSF18	-0.746329	7.92389e-17							LGALS3	0.821792	0.00770055							GPR183	-0.930076	0.0149266		CD7	Hu.CD7	-0.453674	0.0295613
CCL4	1.38116	6.01643e-37		CD28	Hu.CD28	0.380937	8.46e-15		GPR183	-1.35951	3.07666e-16							CCL3	1.25697	0.00796056							ORAI1	-0.889215	0.0389401
CCL3	1.37914	7.65403e-17		CD3D	Hu.CD3-UCHT1	0.657191	6.86e-12		SPINK2	-1.41616	1.10891e-15							GZMA	0.684555	0.0185436
MT2A	1.23961	1.70642e-16		ITGB7	HuMs.integrin.b7	0.335443	3.69e-08		IFITM3	-0.849523	3.65466e-12							CCL5	0.845262	0.0434508
KLRC3	1.22965	5.49795e-12		ITGB2	Hu.CD18	0.324003	3.77e-08		C1orf162	-1.09942	1.61447e-11
TIGIT	1.1955	1.32519e-08		CD1C	Hu.CD1c	0.452378	0.0036262		LMNA	-1.55955	1.66424e-11
ITGA1	1.19411	9.45253e-19							KLF6	-0.641116	3.14865e-11
ARID5B	1.19333	2.78039e-08							TNFRSF4	-0.971181	1.28325e-09
CCL5	1.11943	2.1074e-46							MYADM	-0.897963	9.3504e-08
LITAF	1.10244	1.35459e-24							SELL	-0.649548	1.15713e-07
CXCR6	1.07792	3.77125e-10							PPP1R15A	-0.752734	1.22472e-07
LYST	1.06136	1.84756e-18							IRF7	-1.03794	1.47714e-07
ALOX5AP	1.03833	2.84728e-22							GSN	-1.07148	1.93974e-07
MIR4435-2HG	1.03778	8.27093e-13							FLOT1	-0.784069	2.70891e-07
NR4A2	1.03608	4.19886e-16							TCF7	-1.08472	2.98455e-06
ACP5	1.01099	6.27289e-12							CEBPB	-1.03602	4.96286e-06
IKZF3	0.999121	3.20041e-19							IL7R	-0.744626	9.44607e-06
PTPN22	0.992103	6.10826e-20							MBOAT7	-0.97866	1.58375e-05
GZMA	0.990239	1.1548e-46							ANXA1	-0.61705	3.3312e-05
DUSP2	0.986697	1.46954e-21							CISH	-1.04465	3.74392e-05
GZMK	0.969849	4.24409e-26							TMEM123	-0.760698	0.000156044
AC016831.7	0.933129	4.92882e-18							SSBP2	-0.925481	0.000265458
FABP5	0.931775	4.41874e-05							SNHG12	-0.862071	0.000504326
DNPH1	0.915163	4.80571e-06							SEPT11	-0.800762	0.00114031
KRT81	0.895785	2.10438e-06							CST3	-0.895417	0.00171138
BLOC1S1	0.893997	1.39839e-09							UNC93B1	-0.824758	0.00209646
NDUFA11	0.888889	5.79641e-09							SYPL1	-0.853042	0.00884576
PMEPA1	0.888873	2.41185e-05
AGTRAP	0.874405	8.33387e-10
IGFLR1	0.871517	1.23524e-07
MTRNR2L12	0.865843	1.45573e-72
ITGAE	0.858746	7.24624e-10
FAM49A	0.854504	7.76058e-05
OASL	0.854252	1.54293e-11
GBP5	0.847084	1.07591e-14
PTMS	0.845714	0.000351055
SLAMF7	0.83875	1.36453e-07
FCGR3A	0.824	0.000300479
FAM102B	0.822495	0.000385984
MYLIP	0.82236	2.71041e-07
SLA	0.810197	3.00624e-08
SP140	0.798474	5.39566e-07
NAMPT	0.79777	0.000442147
ATXN1	0.794603	6.57937e-11
FASLG	0.781796	5.81234e-07
HOPX	0.781399	2.76717e-31
HAVCR2/Tim3	0.777803	2.34732e-05
DUSP4	0.765562	5.9414e-06
FKBP5	0.764958	6.66385e-05
GZMH	0.754454	3.48956e-10
ZEB2	0.753127	5.99688e-06
TSPAN5	0.751067	2.84271e-05
SPRY2	0.748993	7.92734e-10
GZMB	0.744359	3.87241e-18
PTPRCAP	0.734123	7.78649e-11
COTL1	0.716454	8.67347e-16
SGMS1	0.708738	0.00241458
C4orf48	0.703454	0.00270801
KRT86	0.702864	8.02003e-05
CD74	0.694948	9.90169e-24
CYTOR	0.691746	2.46053e-09
CLEC2D	0.689504	7.30915e-05
PDE7A	0.671664	3.7695e-11
MAP4K1	0.668849	0.00597091
PTPRJ	0.658043	8.47749e-06
TENT5C	0.655019	0.000494874
IFI27L2	0.651973	2.44484e-06
LCK	0.645537	1.22147e-11
SCML4	0.634577	3.67244e-07
PSME4	0.632559	0.0196541
HLA-DRB5	0.630574	2.09055e-07
ZNF331	0.630284	0.0234861
LYAR	0.629889	2.54531e-05
DNAJA1	0.628339	9.10713e-06
ABI3	0.624241	0.000188755
ITGB1	0.624206	2.4205e-13
PPP2R5C	0.623934	0.00016953
CBLB	0.620923	9.7203e-14
MLLT3	0.620478	0.000995756
RPS10	0.619876	3.01292e-08
NEU1	0.617031	7.78365e-05
HACD4	0.612467	0.000356706
CYTH4	0.604022	0.00144491
HLA-DMA	0.602757	9.09473e-05
HLA-DRB1	0.600533	1.61675e-13
DNAJB6	0.599982	1.93547e-06
COG5	0.598657	0.00140546
LIMS1	0.598494	0.000116173
FAM89B	0.598194	0.03689
FCMR	0.597576	5.69453e-06
S100PBP	0.594943	0.0118211
PYHIN1	0.590744	1.46853e-06

## Sheet: 2. CD8+ BAL cells DEG DEP
Acute																		Recovery
Gene: Up in Unvaxed				Protein: Up in Unvaxed					Gene:Up in Vaxed					Protein:Up in Vaxed				Gene:Up in Unvaxed				Protein:Up in Unvaxed				Gene:Up in Vaxed					Protein:Up in Vaxed
Symbol	Avg_Log2FC	p_Val_Adj		ID	Symbol	Avg_Log2FC	p_Val_Adj		Symbol	Avg_Log2FC	p_Val_Adj		ID	Symbol	Avg_Log2FC	p_Val_Adj		Symbol	Avg_Log2FC	p_Val_Adj		Symbol	Avg_Log2FC	p_Val_Adj		Symbol	Avg_Log2FC	p_Val_Adj		ID	Symbol	Avg_Log2FC	p_Val_Adj
GZMA	0.778999	3.68489e-179		CCR5	Hu.CD195	0.514309	0		CISH	-0.943516	2.6058e-108		PTPRC	Hu.CD45RA	-0.754375	2.87669e-157		FOS	1.25671	5.82821e-99		None				ST8SIA1	-2.43457	1.9248e-68		CD2	Hu.CD2	-0.459453	1.69618e-125
CCL4	1.02769	6.06231e-141		SLAMF7	Hu.CD319	0.60495	2.96174e-231		BCL2	-0.974344	2.38548e-88		CLEC4C	Hu.CD303	-0.330519	3.04208e-66		JUN	0.864205	1.64326e-66						NPEPPS	-1.42956	4.90672e-57		CD44	HuMs.CD44	-0.463344	1.9544e-61
GNLY	1.48808	1.90793e-125		LAG3	Hu.CD223	0.423692	7.09966e-195		MT-ND2	-0.770065	1.54953e-74		SELL	Hu.CD62L	-0.328802	0.000250354		DUSP1	1.00537	3.42892e-64						HLA-DQA2	-2.04054	7.87098e-56		CD5	Hu.CD5	-0.543563	6.66083e-59
GZMB	0.739069	2.64498e-106		CD38	Hu.CD38-HIT2	0.34731	8.0546e-92		TXNIP	-0.59875	8.65312e-66							JUNB	0.743103	1.93842e-40						AHNAK	-0.695266	3.01498e-51		CD69	Hu.CD69	-0.356978	5.45829e-53
GZMK	0.666524	3.95774e-98		KLRD1	Hu.CD94	0.322708	9.99061e-69		SOCS1	-0.905205	1.33746e-53							FOSB	1.01567	8.81569e-36						HLA-DRB5	-0.854602	2.2494e-38		PTPRC	Hu.CD45-HI30	-0.400893	6.20045e-53
PTPN22	0.773411	1.57234e-95		ENTPD1	Hu.CD39	0.355564	3.93657e-20		ZFAS1	-0.607391	5.65096e-50							ZFP36	0.899505	1.04275e-35						RPS10	-1.16337	3.11342e-33		CD244	Hu.CD244	-0.368958	1.02511e-47
IFNG	1.06228	8.0432e-87							MDFIC	-0.766492	2.80037e-45							CD69	0.72587	7.25189e-26						PBXIP1	-0.936352	4.29206e-32		ITGAL	Hu.CD11a	-0.503101	2.72743e-47
ZNF683	0.72428	2.91298e-85							SLAMF1	-0.909167	6.30734e-41							NFKBIA	0.869352	4.4894e-19						ITGA4	-0.657436	4.97109e-25		CD8A	Hu.CD8	-0.377515	1.18089e-22
MIR4435-2HG	0.846696	3.26876e-84							ISG15	-0.906982	4.61468e-40							PPP1R15A	0.76363	4.59165e-16						HLA-DQB1	-0.787751	1.65359e-22		HLA-A	Hu.HLA.ABC	-0.516734	2.20263e-20
CBLB	0.640529	1.08547e-81							SNHG12	-0.791406	2.99934e-38							GADD45B	0.829149	1.14629e-14						THEMIS	-0.61252	6.2463e-21		ITGB2	Hu.CD18	-0.378828	3.9279e-18
AOAH	0.611801	2.198e-77							LMNA	-1.043	7.70633e-29							DDIT3	0.883864	1.09122e-08						AOAH	-0.706383	7.25114e-20		B3GAT1	Hu.CD57	-0.35409	4.18538e-18
HOPX	0.666381	2.63804e-76							DDIT3	-0.886973	1.34231e-24							AL138963.3	0.826941	4.02963e-08						TRAT1	-0.840892	4.23373e-19		CD7	Hu.CD7	-0.383932	1.24083e-05
ITGA1	0.672469	4.83676e-65							TRADD	-0.642069	1.27268e-23							PTGER2	0.591223	1.84219e-05						RBL2	-0.651918	4.93374e-19
NR4A2	0.844844	1.86574e-64							KLRB1	-0.75139	1.89707e-23							DNAJB1	0.606863	0.00302767						ATP2B1	-0.748404	5.6291e-19
KLRD1	0.635678	3.24737e-64							SLC1A5	-0.754086	7.92485e-23							SERTAD1	0.687513	0.0417818						DIAPH1	-0.619184	5.7781e-19
LYST	0.691872	6.07044e-58							XCL1	-0.715807	5.94588e-22															LUC7L3	-0.794003	1.60787e-18
BLOC1S1	0.684144	1.13249e-57							AKT3	-0.691395	1.22507e-21															NLRC5	-0.687747	1.79455e-18
ITM2C	0.595584	2.75727e-57							XCL2	-0.693896	1.16073e-20															SEPT11	-0.634417	7.0601e-18
CPNE7	0.772398	2.6108e-55							CEBPB	-0.667972	4.1209e-20															CCDC167	-0.670692	2.51315e-17
AL138963.3	0.652262	2.66902e-55							UPP1	-0.679691	9.44057e-19															ATP2B4	-0.620225	3.51861e-17
CCL3	1.16386	1.97088e-49							IER5	-0.664772	1.20124e-08															CD6	-0.601262	1.56895e-15
CEBPD	0.600308	4.50738e-49							IARS	-0.615237	2.2536e-08															STAT1	-0.988582	1.69124e-14
NDUFA11	0.672803	6.19923e-48							MX1	-0.612551	0.00414384															TRG-AS1	-0.649768	8.05415e-12
HAVCR2	1.02912	8.1683e-47																								JAK3	-0.714845	9.37189e-12
GALNT2	0.727885	1.11409e-45																								SEL1L3	-0.643284	9.68055e-12
ACP5	0.707382	1.75513e-45																								HNRNPLL	-0.663356	1.9918e-11
GRAMD1B	0.874089	3.22046e-42																								ADAM19	-0.668925	2.10752e-11
MCTP2	0.744706	1.81466e-38																								TRERF1	-0.627874	3.38726e-11
DAPK2	0.794825	3.93383e-38																								NFAT5	-0.723813	3.84597e-11
RGS2	0.837642	9.68273e-37																								INPP4A	-0.659997	2.01932e-09
CLSTN3	0.652445	6.71839e-36																								RALGDS	-0.603427	6.97949e-09
SLAMF7	0.678513	6.02276e-32																								PARP14	-0.715982	1.32348e-08
FASLG	0.623943	2.52811e-31																								MXD4	-0.630072	1.60942e-08
MT1F	0.674436	5.60555e-27																								PLCG1	-0.654888	1.88086e-08
S100PBP	0.592569	3.27221e-25																								LMNA	-0.749625	2.33865e-08
JARID2	0.593475	7.31137e-24																								LINC00861	-0.73279	3.57279e-08
NF1	0.593541	8.57196e-24																								ESYT2	-0.592949	4.14626e-07
KLRC1	0.699225	5.98016e-21																								FUT8	-0.59573	9.19402e-06
CCL4L2	0.767677	3.6413e-07																								GZMB	-0.706595	5.72444e-05

## Sheet: 3. mDC BAL cells DEG DEP 
Acute																						Recovery
	Gene: Up in Unvaxed				Protein: Up in Unvaxed							Gene:Up in Vaxed						Protein:Up in Vaxed					Gene:Up in Unvaxed						Protein:Up in Unvaxed					Gene:Up in Vaxed						Protein:Up in Vaxed
Cluster	Symbol	Avg_Log2FC	p_Val_Adj		ID	Cluster	Symbol	Avg_Log2FC	p_Val_Adj		Cluster	Symbol	Avg_Log2FC	p_Val_Adj		ID	Cluster	Symbol	Avg_Log2FC	p_Val_Adj		Cluster	Symbol	Avg_Log2FC	p_Val_Adj		ID	Cluster	Symbol	Avg_Log2FC	p_Val_Adj		Cluster	Symbol	Avg_Log2FC	p_Val_Adj		ID	Cluster	Symbol	Avg_Log2FC	p_Val_Adj
12	LYZ	1.52207	4.61732e-57		ITGA1	21	Hu.CD49a	0.389093	0.0342129		12	HLA-DQA2	-1.37397	5.18248e-62		ITGB1	12	Hu.CD29	-0.509502	7.70563e-64		12	AQP3	0.640196	7.48583e-07		FCER1A	12	Hu.FceRIa	0.367074	7.53935e-06		12	HLA-DQA2	-1.0329	5.42363e-25		ICAM1	21	Hu.CD54	-0.463575	3.38889e-19
12	MARCO	3.29021	1.85354e-48								12	IFITM2	-1.21667	1.04347e-47		CD44	12	HuMs.CD44	-0.788612	1.03233e-58		12	FKBP5	0.601052	0.0216024		Ig lambda light chain	21	Hu.Ig.LightChain.l	0.327997	4.12803e-12		21	HLA-DQA2	-1.48893	5.65463e-38		ENTPD1	21	Hu.CD39	-0.515983	1.26608e-12
12	C1QB	1.98524	2.60289e-37								12	NR4A1	-1.08454	2.41201e-30		FCGR2A	12	Hu.CD32	-0.642853	1.40807e-50		12	IER3	0.79385	0.0403623		LAG3	21	Hu.CD223	0.399841	1.55204e-08		21	NPEPPS	-1.77615	4.58054e-28		ITGAX	21	Hu.CD11c	-0.512153	2.00029e-06
12	APOE	2.33353	1.77977e-36								12	LTC4S	-1.15737	2.80981e-30		ENTPD1	12	Hu.CD39	-0.731982	4.30194e-50		21	YBX1	0.652458	9.67925e-19		FCGR3A	21	Hu.CD16	0.538271	1.13095e-06		21	LGALS2	-0.67082	1.55439e-15		PTPRC	21	Hu.CD45-HI30	-0.355098	7.29386e-05
12	C1QC	1.53646	8.61097e-34								12	F13A1	-2.02992	1.42294e-29		ITGB2	12	Hu.CD18	-0.798088	1.94892e-49		21	FABP4	3.46756	1.77762e-10		CD28	21	Hu.CD28	0.382002	3.34388e-06		21	FAM3B	-1.27674	2.03172e-12		HLA-A	21	Hu.HLA.ABC	-0.377794	0.00108306
12	ACP5	1.56104	9.43053e-34								12	IFITM3	-0.778244	7.6827e-29		ITGA4	12	Hu.CD49d	-0.512908	3.12253e-47		21	LGALS3	1.5	7.1148e-10		SLAMF7	21	Hu.CD319	0.394988	1.86956e-05		21	PNMA1	-0.804646	2.08723e-10		CD40	21	Hu.CD40	-0.380601	0.00167529
12	FBP1	1.75698	2.76041e-33								12	IRF7	-0.697685	1.04446e-28		CD48	12	Hu.CD48	-0.680763	3.94971e-43		21	CD9	2.01773	1.18158e-09		LAMP1	21	Hu.CD107a	0.394699	3.15647e-05		21	ADAM19	-0.834756	3.78094e-10
12	C1QA	1.82511	5.81619e-33								12	IFITM1	-1.12785	3.19313e-27		CD1C	12	Hu.CD1c	-0.756761	4.48322e-43		21	S100A4	1.55423	1.37166e-09		IGHM	21	Hu.IgM	0.385818	0.000525363		21	GSTM1	-2.0674	4.83041e-10
12	RASAL2	1.42309	1.59128e-31								12	ISG15	-0.940739	5.42602e-27		ITGAX	12	Hu.CD11c	-0.727255	3.26334e-42		21	AC026369.3	2.6285	5.21336e-09		FCGR2A	21	Hu.CD32	0.345542	0.0244812		21	LMNA	-0.748516	2.01078e-09
12	FTH1	0.765812	6.61663e-31								12	MEF2C	-0.767426	4.08712e-26		PTPRC	12	Hu.CD45-HI30	-0.646394	1.71457e-40		21	AL138963.3	1.21773	2.16343e-08		ITGAM	21	Hu.CD11b	0.447804	0.025477		21	NDRG2	-0.792117	7.36494e-09
12	FTL	1.53514	9.42223e-31								12	DUSP2	-1.29396	4.7613e-26		PECAM1	12	Hu.CD31	-0.69383	7.44274e-34		21	S100A6	0.705554	4.06503e-08		TRDV2	21	Hu.TCR.Vd2	0.500432	0.0357972		21	S100B	-0.871028	8.17101e-09
12	MCEMP1	2.18137	3.85481e-30								12	ZFP36L2	-0.648402	2.30337e-25		CCR6	12	Hu.CD196	-0.717269	1.14555e-33		21	FTH1	0.860222	4.28166e-08								21	UCP2	-0.662721	2.6396e-08
12	S100A9	2.20069	5.01852e-29								12	CLEC5A	-1.06318	1.84214e-24		CD101	12	Hu.CD101	-0.330778	6.60089e-33		21	FOS	0.647965	2.77525e-07								21	RAMP1	-0.648744	3.00026e-08
12	LTA4H	1.87655	3.5796e-28								12	ANKH	-2.3623	5.96954e-24		SIGLEC7	12	Hu.CD328	-1.07081	3.37795e-31		21	FTL	2.13195	2.80933e-07								21	ITGB2-AS1	-1.05414	3.1601e-08
12	APOC1	1.56039	6.86536e-28								12	OGFRL1	-0.723807	1.04387e-23		ITGAL	12	Hu.CD11a	-0.595032	2.38448e-29		21	ELOB	0.813365	3.83369e-07								21	SLAMF7	-0.625524	3.91811e-08
12	FABP4	2.30056	1.18979e-26								12	PLD4	-0.800278	1.22057e-23		ITGAM	12	Hu.CD11b	-0.605337	3.46327e-28		21	MCEMP1	2.28486	4.01219e-07								21	NBEAL2	-1.01714	4.19111e-08
12	CYP27A1	2.54512	3.44191e-25								12	CAMK1D	-0.71143	1.29408e-23		CD47	12	Hu.CD47	-0.562671	3.46962e-28		21	FN1	1.57397	5.59186e-07								21	AHNAK	-0.662904	6.20025e-08
12	GRN	0.78007	8.09771e-25								12	SYTL3	-1.03632	1.5327e-23		ICAM1	12	Hu.CD54	-0.449022	1.20233e-27		21	S100A9	2.45369	9.29261e-07								21	PIM3	-0.727094	3.63648e-07
12	GLUL	1.38069	1.02009e-24								12	NR4A2	-0.9533	2.35966e-23		IFNGR1	12	Hu.CD119	-0.351368	1.2129e-18		21	ALOX5AP	2.13546	1.22366e-06								21	LAG3	-1.00089	1.64667e-06
12	CTSB	0.84457	1.5453e-24								12	EPSTI1	-0.768362	3.94503e-23		HLA-A	12	Hu.HLA.ABC	-0.544462	1.32846e-18		21	CD52	0.715976	1.57327e-06								21	VMO1	-0.896745	2.41893e-06
12	PSAP	0.855174	3.12477e-24								12	CMTM3	-0.663797	1.19164e-22		CD4	12	Hu.CD4-RPA.T4	-0.405491	6.05305e-14		21	HNMT	2.14747	4.48622e-06								21	PRKAR2B	-0.676179	2.59146e-06
12	CD68	1.03727	4.21644e-23								12	FCER1A	-0.933164	2.00906e-22		CD86	12	Hu.CD86	-0.521463	1.02458e-11		21	OASL	2.92646	4.85668e-06								21	FAM69A	-1.00908	3.68848e-06
12	ANXA2	0.619434	3.43111e-21								12	KLF6	-0.659226	2.04942e-22		CD33	12	Hu.CD33	-0.459785	1.75923e-11		21	IFI6	1.7304	5.19856e-06								21	RMI2	-1.06082	4.19897e-06
12	CTSD	1.76613	3.58418e-21								12	IFI44L	-1.52628	2.98026e-22		CD5	12	Hu.CD5	-0.560718	1.36685e-08		21	PPARG	2.4546	6.82462e-06								21	CAMK1D	-0.634851	5.57631e-06
12	CD63	0.670586	4.02244e-21								12	HSH2D	-1.13677	5.77877e-22		SLAMF7	12	Hu.CD319	-0.372948	7.96051e-08		21	CCL18	3.94386	8.50909e-06								21	MARCH3	-0.9617	5.59651e-06
12	SERPINA1	1.02373	1.09852e-20								12	CREB5	-0.843945	2.20835e-21		ANPEP	12	Hu.CD13	-0.365425	4.137e-07		21	RNF130	2.12562	8.9229e-06								21	ATP2B4	-0.795372	1.19219e-05
12	MRC1	0.963212	1.96125e-20								12	NQO2	-0.740736	4.68511e-21		CD2	12	Hu.CD2	-0.534018	1.91986e-06		21	PARVB	1.60731	8.96365e-06								21	ENPP1	-0.810754	2.65898e-05
12	FCGR3A	1.92902	7.72795e-20								12	XAF1	-0.817905	4.87204e-21		FCGR1A	12	Hu.CD64	-0.36199	0.00181591		21	MRC1	2.15083	1.17502e-05								21	SLC7A6	-0.973924	2.81562e-05
12	MTRNR2L12	0.668666	9.34268e-20								12	MBP	-0.65057	2.03982e-20		IFNGR1	21	Hu.CD119	-0.495502	1.54267e-16		21	CFD	3.28285	1.82737e-05								21	KIAA0040	-0.615148	3.03093e-05
12	S100A8	2.20067	3.87048e-18								12	CABIN1	-0.955286	3.89854e-20		ITGAL	21	Hu.CD11a	-0.439488	4.0821e-12		21	HSPB1	1.19148	1.89979e-05								21	SLC8A1	-0.622906	4.24444e-05
12	GPNMB	2.34765	3.30933e-17								12	GPR183	-0.837677	4.23747e-20		CD4	21	Hu.CD4-RPA.T4	-0.390985	1.30357e-10		21	LGALS3BP	2.69096	1.92426e-05								21	ITGA1	-1.49152	5.3454e-05
12	CSTB	0.733925	2.98563e-15								12	RGS1	-1.00794	7.79874e-19		ITGB2	21	Hu.CD18	-0.454649	8.97462e-09		21	FCGR3A	2.90486	2.66152e-05								21	SDHA	-0.603335	6.28651e-05
12	CD81	0.689721	4.75796e-15								12	SNHG12	-0.852449	1.24961e-18		ITGA4	21	Hu.CD49d	-0.329523	1.04937e-08		21	GCHFR	2.73511	2.99848e-05								21	XCR1	-0.60371	6.44851e-05
12	LGALS3	0.608774	4.80064e-15								12	CSRNP1	-0.928333	1.28259e-18		CD44	21	HuMs.CD44	-0.510577	2.06231e-08		21	SERPING1	2.95052	3.64469e-05								21	VAV3	-0.657094	7.25799e-05
12	NUPR1	2.06197	1.0136e-14								12	MX2	-0.846114	2.05551e-18		CLEC12A	21	Hu.CLEC12A	-0.495396	4.64469e-08		21	CTSL	0.956065	3.96028e-05								21	MARCKS	-1.0665	8.62913e-05
12	CD52	0.861295	2.00931e-14								12	AFF3	-1.1689	4.22088e-18		ANPEP	21	Hu.CD13	-0.382515	1.41921e-06		21	DOK2	1.9758	4.55414e-05								21	RSRP1	-0.667169	0.000131517
12	STXBP2	2.36859	3.23493e-14								12	ZFP36	-0.754321	5.75044e-18		ITGAX	21	Hu.CD11c	-0.415237	5.11784e-06		21	GLRX	1.47671	5.76164e-05								21	CCDC6	-0.622369	0.000192464
12	SMIM25	1.57438	3.33133e-14								12	LGALS2	-0.657652	7.1503e-18		PTPRC	21	Hu.CD45-HI30	-0.332709	1.8626e-05		21	NCF2	2.29097	7.43822e-05								21	FAM160A2	-0.811107	0.000218617
12	PRDX1	0.700836	4.94371e-14								12	RGS2	-1.01588	8.84999e-18		PECAM1	21	Hu.CD31	-0.359244	0.00302286		21	RAC2	1.27256	8.57291e-05								21	SDK1	-0.895027	0.000229252
12	CALR	0.746402	4.42427e-13								12	ARID5A	-0.612287	1.60954e-17		SIGLEC7	21	Hu.CD328	-1.03069	0.00607939		21	ACP5	1.39065	0.000127343								21	CALCRL	-1.14476	0.000345948
12	TSPO	0.713737	1.59811e-12								12	RGS14	-0.72467	3.71594e-17		CCR6	21	Hu.CD196	-0.348361	0.0186056		21	CEBPB	1.03987	0.000133714								21	TSPAN2	-1.14999	0.000409006
12	TFRC	1.79041	2.44969e-12								12	MYADM	-0.650613	5.46528e-17								21	LY96	1.09591	0.000272881								21	PTK2	-0.652465	0.000441613
12	GRINA	0.61246	2.58602e-12								12	PAK1	-0.597957	5.65664e-17								21	SERPINA1	2.14308	0.00044015								21	RUNX3	-0.832849	0.000675424
12	CCL18	2.58528	1.65013e-11								12	PKIB	-0.688135	6.08398e-17								21	NOP10	1.25926	0.000591886								21	HSH2D	-0.647385	0.000811775
12	ASAH1	0.992043	1.09666e-10								12	TMEM97	-1.16392	8.6762e-17								21	C1QA	2.74333	0.000788736								21	SLCO3A1	-0.607429	0.00112041
12	RETN	1.94284	2.96501e-10								12	CX3CR1	-1.16762	1.37347e-16								21	CTSC	1.80516	0.00215367								21	ANPEP	-0.593714	0.00123505
12	GCHFR	1.53707	1.10859e-09								12	ATF3	-0.86046	1.75661e-16								21	MARCO	2.57758	0.00394223								21	EIF2AK4	-0.609111	0.00164638
12	ALDH2	0.732328	2.53187e-09								12	IFI44	-0.958183	2.36507e-16								21	IFITM2	0.971623	0.00423678								21	MFSD6	-0.870194	0.00213413
12	AL138963.3	1.50904	3.25756e-09								12	MX1	-0.685552	2.68996e-16								21	CTSD	2.36872	0.00444348								21	AC004687.1	-0.650906	0.00222759
12	GSTO1	0.778173	4.46098e-09								12	POU2F2	-0.809916	3.77144e-16								21	C1QC	2.88954	0.00491803								21	TACSTD2	-0.632124	0.00266424
12	PPARG	1.6488	1.8115e-08								12	HIST1H4C	-0.628273	5.08504e-16								21	CARD16	1.94937	0.00549541								21	ENOX1	-0.82731	0.00389932
12	SERPING1	1.76569	1.09159e-07								12	UBE2S	-0.672373	7.46586e-16								21	FBP1	2.18118	0.00566255								21	LINC00877	-0.860328	0.00651915
12	NUCB1	1.05316	9.61067e-07								12	ICAM3	-0.738768	1.09948e-15								21	PLIN2	1.927	0.00614539								21	IL6R	-0.863541	0.00691422
12	CTSL	1.61822	1.74676e-06								12	EIF2AK4	-0.608003	2.38706e-15								21	PLAUR	0.696552	0.0100512								21	KIAA0100	-0.655553	0.0091586
12	CTSS	0.607894	7.8759e-06								12	FOXP1	-0.606857	3.16891e-15								21	CAPG	1.05832	0.0123235								21	MED25	-0.596212	0.0110785
12	CFD	1.48579	1.35891e-05								12	TAF1D	-0.660434	5.85168e-15								21	AKR1B1	1.42907	0.0145963								21	PPP6R1	-0.634739	0.0114077
12	FABP5	0.644563	1.45212e-05								12	GRASP	-0.812792	2.07231e-14								21	APOC1	2.93128	0.0250614								21	FKBP1B	-0.598338	0.0127996
12	SLC11A1	1.49949	1.47704e-05								12	BTG2	-0.739473	2.11703e-14								21	LY6E	1.09048	0.0267429								21	TMEM43	-0.607582	0.0132595
12	CD163	1.83687	2.18815e-05								12	NLRP3	-0.917541	2.63957e-14								21	CTSA	2.14196	0.0317492								21	AIM2	-0.729528	0.0189148
12	MS4A4A	1.55304	2.48792e-05								12	LMNA	-0.786081	3.7369e-14								21	CBR1	1.06655	0.0326899								21	RPS10	-0.870564	0.0246692
12	MGST3	0.844073	2.87749e-05								12	SGK1	-0.728213	4.27303e-14								21	ATP6V1F	0.628625	0.042554								21	TTC7A	-0.696604	0.0271612
12	LRP1	1.42899	3.70692e-05								12	KLF4	-0.733603	5.57475e-14								21	LPXN	1.20387	0.0494106								21	P2RY13	-0.839269	0.0369649
12	FSCN1	1.19629	5.5051e-05								12	DDIT3	-0.750897	2.03428e-13																			21	AC008691.1	-1.11354	0.0373348
12	SDCBP	0.636253	5.73741e-05								12	ATP2B4	-0.711399	2.91844e-13																			21	BAIAP2	-0.885915	0.0373562
12	CD36	1.35887	7.69742e-05								12	DUSP1	-0.728894	2.96913e-13																			21	FZD2	-1.04345	0.0460409
12	BCL2A1	0.600614	0.000329644								12	JUNB	-0.673384	3.21588e-13																			21	N4BP2	-0.720258	0.0494817
12	AQP3	0.789914	0.00070964								12	HOOK2	-0.836897	3.64775e-13																			26	HLA-DQA2	-1.29831	7.09449e-10
12	NOP10	0.656576	0.000869014								12	PCNX2	-0.852947	4.42312e-13																			26	IDO1	-0.780489	0.0109651
12	ALAS1	1.70757	0.00110731								12	HIP1	-0.911545	7.3369e-13																			26	TXN	-0.652792	0.0367166
12	TGM2	1.80701	0.00411339								12	C9orf72	-0.656352	1.04713e-12
12	LAMP1	1.27832	0.0471092								12	CCR2	-1.04796	1.2373e-12
21	MT-CO1	0.612133	3.32447e-37								12	SLC7A5	-0.828437	1.42509e-12
21	MTRNR2L12	0.778594	9.48546e-22								12	INSIG1	-0.764761	2.24888e-12
21	MT-ND5	0.784201	4.3568e-16								12	OAS3	-0.77828	9.22073e-12
21	AL138963.3	1.79611	2.54039e-08								12	RRP12	-0.779165	9.55123e-12
21	MT-ND6	1.12783	1.19239e-06								12	TMEM18	-0.595029	1.85453e-11
21	S100A4	0.846607	2.96516e-05								12	SNHG7	-0.61834	1.883e-11
26	MT-ND6	0.754815	0.0276029								12	CEBPD	-0.615732	1.98878e-11
26	MT-ND5	0.619008	0.0427249								12	FRMD4B	-0.601957	2.39782e-11
											12	SNHG15	-0.616907	3.64479e-11
											12	KLHL5	-0.672771	4.46086e-11
											12	P3H2	-1.01617	4.91292e-11
											12	ATP2B1-AS1	-0.740187	4.96952e-11
											12	CD69	-0.772139	5.48409e-11
											12	PRMT9	-0.772385	6.74545e-11
											12	PMAIP1	-0.938519	7.20121e-11
											12	XPC	-0.729973	9.63886e-11
											12	ST6GAL1	-0.876412	1.02891e-10
											12	C12orf45	-0.622008	1.47133e-10
											12	IFIT1	-0.965753	7.40628e-10
											12	CHMP1B	-0.850944	7.89835e-10
											12	AC004817.3	-1.06882	9.63589e-10
											12	CUBN	-1.20832	9.71258e-10
											12	ARHGAP26	-0.636528	1.07809e-09
											12	LINC01220	-1.25785	1.1319e-09
											12	AC007384.1	-0.735946	1.15746e-09
											12	LINC02256	-0.60284	1.18889e-09
											12	SH2B3	-0.651958	1.32017e-09
											12	EMB	-0.671437	1.65791e-09
											12	HSPA6	-0.852549	2.02879e-09
											12	P2RY6	-0.711681	2.83254e-09
											12	CLDN1	-1.11217	3.29658e-09
											12	ITGB2-AS1	-0.795187	6.01136e-09
											12	FOSB	-0.737039	6.25371e-09
											12	RELL1	-0.864977	6.71842e-09
											12	SSH1	-0.724625	9.23673e-09
											12	RNF24	-0.672955	1.54063e-08
											12	BBC3	-0.771973	1.57267e-08
											12	GPR132	-0.657085	1.64119e-08
											12	CMPK2	-0.739479	1.73004e-08
											12	DBP	-0.648051	1.8922e-08
											12	GAPT	-0.71439	2.4865e-08
											12	CAMK2G	-0.78482	2.72563e-08
											12	GPAT3	-0.751253	2.8162e-08
											12	NLRP1	-0.609308	3.01733e-08
											12	KIAA0040	-0.874685	3.69451e-08
											12	ARL4C	-0.675406	4.2156e-08
											12	CDC42EP1	-0.70902	4.36972e-08
											12	GADD45B	-0.685402	4.89467e-08
											12	IER2	-0.718078	6.44723e-08
											12	ISG20	-0.846518	6.68283e-08
											12	FADS1	-0.920806	7.86454e-08
											12	ARHGEF40	-1.00195	9.91947e-08
											12	EPS8	-0.675224	1.02524e-07
											12	HSPA1B	-0.850788	1.10803e-07
											12	IL1R1	-0.864998	1.44781e-07
											12	CMSS1	-0.667259	1.97046e-07
											12	CREM	-0.627098	1.99377e-07
											12	UPF2	-0.625687	1.99389e-07
											12	SLCO3A1	-0.674203	2.95816e-07
											12	SLC7A1	-0.76202	3.06198e-07
											12	CKS2	-0.782616	3.55413e-07
											12	CYTH3	-0.950307	3.69425e-07
											12	RUNX2	-0.7517	3.70111e-07
											12	AP1G2	-0.623474	4.18295e-07
											12	U2AF1L4	-0.694282	4.20029e-07
											12	HEXDC	-0.614396	4.46528e-07
											12	MS4A4E	-0.881789	5.17154e-07
											12	TOB1	-0.6567	7.51551e-07
											12	DGKD	-1.06585	7.94825e-07
											12	PER1	-0.805585	8.43047e-07
											12	STRBP	-0.817979	9.97981e-07
											12	C16orf54	-0.879267	1.06451e-06
											12	PRMT7	-1.00316	1.11307e-06
											12	SORL1	-0.605876	1.14458e-06
											12	IGFBP7	-0.695256	1.32326e-06
											12	PHETA1	-0.779537	1.44607e-06
											12	CTSW	-0.853196	1.85334e-06
											12	MCOLN2	-0.638995	1.92452e-06
											12	EMP1	-0.835643	2.15472e-06
											12	DHX8	-0.59367	2.26544e-06
											12	KCNMB1	-0.755832	3.04971e-06
											12	BTG3	-0.647585	3.10111e-06
											12	KLF2	-0.9469	3.12754e-06
											12	CCDC170	-1.02013	4.73051e-06
											12	CRIP2	-0.851668	5.38103e-06
											12	KMT2E-AS1	-0.876214	5.43392e-06
											12	USP36	-0.648895	5.47043e-06
											12	VEGFA	-0.811297	7.82847e-06
											12	SVIP	-0.840132	8.47996e-06
											12	PIP4P2	-0.68446	8.83474e-06
											12	FAM98C	-0.714283	1.03078e-05
											12	SEMA4D	-0.622801	1.07524e-05
											12	AL390957.1	-0.845582	1.12071e-05
											12	AC087286.2	-0.778156	1.30393e-05
											12	NFE2L3	-0.641559	1.48038e-05
											12	CDK11A	-0.791784	2.03879e-05
											12	ELK3	-0.603082	2.05084e-05
											12	SQLE	-0.657725	2.29308e-05
											12	ZNF331	-0.605454	2.62445e-05
											12	PATJ	-0.869227	2.65742e-05
											12	THUMPD3-AS1	-0.737303	3.70304e-05
											12	MIR22HG	-0.647899	4.28086e-05
											12	ZNF846	-0.59833	4.51841e-05
											12	TGS1	-0.668667	4.78944e-05
											12	KLF16	-0.61337	5.31262e-05
											12	INO80D	-0.727839	5.53842e-05
											12	FAM53C	-0.674338	5.96935e-05
											12	TBRG4	-0.645076	6.25936e-05
											12	ITM2C	-0.830399	6.58692e-05
											12	REV1	-0.680297	6.97454e-05
											12	C2orf76	-0.666541	7.44315e-05
											12	RCBTB2	-0.643296	7.48217e-05
											12	FBXL12	-0.59616	7.85659e-05
											12	AC022217.3	-0.620019	9.32327e-05
											12	HDAC10	-0.688027	0.000114497
											12	LPAR6	-0.816895	0.000126672
											12	RGS18	-0.768838	0.000143471
											12	EVA1B	-0.66528	0.000202902
											12	DDIT4	-0.933184	0.000207603
											12	LPAR5	-0.785835	0.000270034
											12	BRCA2	-0.623371	0.000288978
											12	DDX59	-0.712257	0.00029692
											12	SMC4	-0.703205	0.000565318
											12	UBXN7	-0.791655	0.000722
											12	PHTF1	-0.64144	0.000764609
											12	LRRC23	-0.71176	0.00153478
											12	RAB11FIP4	-0.606172	0.00159074
											12	PLEKHA5	-0.930509	0.00160365
											12	STK19	-0.782951	0.00168148
											12	S100PBP	-0.665665	0.00186407
											12	SCN9A	-0.874618	0.00278612
											12	RBBP8	-0.630391	0.00396713
											12	SYTL1	-0.62044	0.00421519
											12	P2RY12	-0.682574	0.00672674
											12	ABCC4	-0.631289	0.00674831
											12	GRAMD4	-0.686432	0.00816812
											12	THAP2	-0.776379	0.00959928
											12	SMAD7	-0.591726	0.0116497
											12	TARBP2	-0.59091	0.0125983
											12	DAAM1	-0.659443	0.0179397
											12	LINC02381	-0.673646	0.0188725
											12	HSPA1A	-0.660472	0.0195904
											12	DUSP5	-0.656506	0.0283083
											12	EGR1	-1.03	0.0293693
											12	CD207	-0.617105	0.0469411
											21	HLA-DQA2	-1.67252	1.59913e-52
											21	SCARB1	-0.660028	2.27663e-15
											21	RAMP1	-1.25614	2.95902e-15
											21	ISG15	-1.00623	1.93577e-13
											21	MX1	-0.758918	4.89603e-13
											21	TSPAN33	-0.737594	2.97087e-12
											21	TRIP6	-0.717644	7.95237e-10
											21	NQO2	-0.757869	5.17638e-09
											21	NFE2L3	-0.658399	1.27889e-08
											21	ASPHD2	-0.826938	7.425e-08
											21	OAS2	-0.982921	9.71679e-08
											21	ARHGAP22	-1.25003	7.94734e-07
											21	VMO1	-0.667254	1.11584e-06
											21	MX2	-0.792082	2.16828e-06
											21	PIK3R5	-0.702407	3.66427e-05
											21	MAN1B1	-0.595043	5.6808e-05
											21	BAIAP2	-0.703347	6.27075e-05
											21	KIF1C	-0.965506	6.50845e-05
											21	DHRS4L2	-0.765834	8.10443e-05
											21	RNF40	-0.63605	9.14268e-05
											21	DNASE1L3	-0.613926	0.000175863
											21	FAM102A	-0.724309	0.0006808
											21	CHRFAM7A	-0.867055	0.000856679
											21	KHNYN	-0.868925	0.00213947
											21	TIFAB	-0.638999	0.00221842
											21	AC119428.2	-1.01931	0.00382173
											21	PER1	-0.815803	0.00869995
											21	SLC29A3	-0.608365	0.00924469
											21	PHF1	-0.753339	0.00928443
											21	FAM53B	-0.761259	0.0151549
											21	COG4	-0.68869	0.0161093
											21	ZNF503	-0.601878	0.0173304
											21	PDZD8	-0.680657	0.0233371
											21	HIP1	-0.650807	0.0234345
											21	SNAI3	-0.640697	0.0279771
											21	CSMD1	-0.785699	0.0307081
											21	CEP104	-0.60793	0.033454
											21	FAM3B	-0.747636	0.0342423
											21	SH3BP5	-0.60977	0.0363196
											21	HOTAIRM1	-0.609781	0.04552
											26	HLA-DQA2	-1.44731	1.29259e-11

## Sheet: 4. pDC BAL cells DEG DEP 
Acute																		Recovery
Gene: Up in Unvaxed					Protein: Up in Unvaxed				Gene:Up in Vaxed					Protein:Up in Vaxed				Gene:Up in Unvaxed					Protein:Up in Unvaxed				Gene:Up in Vaxed					Protein:Up in Vaxed
Symbol	Avg_Log2FC	p_Val_Adj		ID	Symbol	Avg_Log2FC	p_Val_Adj		Symbol	Avg_Log2FC	p_Val_Adj		ID	Symbol	Avg_Log2FC	p_Val_Adj		Symbol	Avg_Log2FC	p_Val_Adj		ID	Symbol	Avg_Log2FC	p_Val_Adj		Symbol	Avg_Log2FC	p_Val_Adj		ID	Symbol	Avg_Log2FC	p_Val_Adj
RASAL2	2.74237	0.000827954		TCRDV2	Hu.TCR.Vd2	0.905345	0.00547353		HLA-DQA2	-3.90805	1.57248e-44		CD38	Hu.CD38-HIT2	-0.339675	2.37719e-06		None				None					HLA-DQA2	-1.9092	0.0118053		ICAM1	Hu.CD54	-0.54065	0.00375335
MTRNR2L12	0.932246	0.0142842							RPS29	-0.734281	1.75047e-06		CD44	HuMs.CD44	-0.44427	0.000116926															CD38	Hu.CD38-HIT2	-0.552782	0.0038255
ARHGAP24	1.53441	0.0434757							IFI44L	-1.44272	1.93761e-05		HLABC	Hu.HLA.ABC	-0.485109	0.000191048															CLEC4C	Hu.CD303	-0.53242	0.0178066
									ISG15	-1.65546	4.46057e-05		ITGB2	Hu.CD18	-0.572399	0.000376719
									HLA-DRB5	-0.59291	8.15506e-05		SELL	Hu.CD62L	-1.38838	0.000812274
									USP18	-1.89382	0.00093193
									SPATS2L	-0.989829	0.00101817
									LY6E	-1.0739	0.0012139
									AHNAK	-0.706193	0.00260406
									DMXL2	-0.948313	0.0154457
									CHD4	-0.824674	0.0349253
									IL6ST	-0.893443	0.0351104
									C4orf48	-1.04559	0.0463952
									OAS2	-1.17377	0.0478009

## Sheet: 5. Macrophage BAL cells DEG DEP
Acute																						Recovery
Gene: Up in Unvaxed					Protein: Up in Unvaxed						Gene:Up in Vaxed						Protein:Up in Vaxed					Gene:Up in Unvaxed							Protein:Up in Unvaxed					Gene:Up in Vaxed						Protein:Up in Vaxed
Cluster	Symbol	Avg_Log2FC	p_Val_Adj		Cluster	iD	Symbol	Avg_Log2FC	p_Val_Adj		Cluster	Symbol	Avg_Log2FC	p_Val_Adj		ID	Cluster	Symbol	Avg_Log2FC	p_Val_Adj		Cluster	Symbol	Avg_Log2FC	p_Val_Adj		ID	Cluster	Symbol	Avg_Log2FC	p_Val_Adj		Cluster	Symbol	Avg_Log2FC	p_Val_Adj		ID	Cluster	Symbol	Avg_Log2FC	p_Val_Adj
0	MARCO	0.866355	0		0	KIR2DL1	Hu.CD158	0.334339	1.8625e-200		0	ISG15	-0.7478	0		ITGAL	0	Hu.CD11a	-0.350779	0		0	LYZ	0.628401	0		FCGR3A	0	Hu.CD16	0.357088	6.30285e-302		0	ISG15	-0.964855	0			0	HuMsRt.CD278	-0.385766	4.06001e-272
0	APOE	0.671927	7.03724e-294		0	CD1D	Hu.CD1d	0.327409	1.40478e-184		0	AC013457.1	-3.32923	0		SLAMF7	0	Hu.CD319	-0.492653	0		0	PMP22	0.908544	0		FCGR3A	10	Hu.CD16	0.405674	1.09557e-40		0	PTGER3	-2.06873	0			0	Hu.CD328	-0.378305	8.48532e-119
0	ANPEP	0.860223	1.60483e-277		0	CLEC4C	Hu.CD303	0.380514	2.97556e-231		0	LSAMP	-0.706502	0		ICOS	0	HuMsRt.CD278	-0.394572	1.41459e-303		0	APOE	0.701116	6.2664e-294		CD48	10	Hu.CD48	0.429555	4.52728e-07		0	AC013457.1	-1.67074	0			10	HuMsRt.CD278	-0.339309	6.00325e-21
0	AHNAK	0.676997	1.50015e-262		0	PTPRC	Hu.CD45RA	0.408949	2.0146e-170		0	CTSW	-1.0677	0		ITGB2	0	Hu.CD18	-0.354145	2.02907e-265		0	SLC1A7	0.896644	4.10388e-180		CD36	10	Hu.CD36	0.384843	0.00054289		0	LSAMP	-0.674857	0			11	Hu.CD169	-0.423226	5.48867e-43
0	PMP22	1.37199	1.53788e-257		0	CD48	Hu.CD48	0.601909	8.59846e-69		0	FOLR3	-0.949742	0		ITGA1	0	Hu.CD49a	-0.483463	2.59422e-253		0	C15orf48	0.809441	1.06181e-157		CD86	13	Hu.CD86	0.355691	1.52836e-21		0	FOLR3	-1.78135	0			11	Hu.CD163	-0.388371	1.18433e-20
0	CCL18	0.984503	4.03254e-221		0	CD7	Hu.CD7	0.432212	3.74487e-06		0	BHLHE41	-0.91181	0		ITGAX	0	Hu.CD11c	-0.403339	8.9652e-223		0	ACTA2	0.787561	5.29297e-130		CD33	13	Hu.CD33	0.388785	6.76565e-10		0	RPS26	-0.591526	0			11	Hu.CD49a	-0.400317	5.4703e-17
0	SPOCD1	1.18694	1.20569e-191		0	ITGA6	HuMs.CD49f	0.335214	2.64771e-223		0	RPS26	-0.740468	0		SIGLEC7	0	Hu.CD328	-0.45369	1.30842e-151		0	AC007298.1	0.614788	2.82565e-86		CD48	13	Hu.CD48	0.436571	0.0191772		0	SULT1A1	-1.10309	0			11	Hu.CD45RA	-0.40824	1.27917e-15
0	KCNMA1	0.791364	1.10334e-165		2	CCR4	Hu.CD194	0.479943	5.5046e-125		0	GAPLINC	-1.13532	0		CD3D	0	Hu.CD3-UCHT1	-0.423029	5.39535e-133		0	VCAN	0.772432	1.36833e-85		FCGR3A	16	Hu.CD16	0.427659	3.33542e-15		0	COLEC12	-0.945156	0			11	Hu.CD328	-0.518039	4.05358e-15
0	ITGAE	0.786263	3.86302e-128		2	PTPRC	Hu.CD45RA	0.336952	5.91674e-69		0	SIGLEC1	-0.687713	2.98615e-300		SIGLEC7	10	Hu.CD328	-0.489641	8.74958e-16		0	TMEM176B	0.640292	4.75079e-85		CD86	16	Hu.CD86	0.374556	3.99361e-14		0	GAPLINC	-1.25471	0			11	Hu.CD194	-0.422049	3.09838e-13
0	GSTM1	1.23276	9.69792e-118		3	CCR4	Hu.CD194	0.362871	4.79402e-60		0	PTGER3	-1.74674	1.79383e-287		ITGA4	11	Hu.CD49d	-0.410427	2.56448e-45		0	TMEM176A	0.598461	7.02537e-65		CD33	16	Hu.CD33	0.368701	1.74905e-06		0	TGM2	-0.971086	0			11	Hu.CD196	-0.402316	5.1403e-09
0	FPR3	0.880378	5.61014e-114		4	KIR2DL1	Hu.CD158	0.34839	1.07632e-92		0	IFI44L	-1.02684	5.17509e-261		IFNGR1	11	Hu.CD119	-0.375548	1.95668e-39		0	TNF	0.615223	2.32343e-38		FCGR3A	19	Hu.CD16	0.331891	2.21976e-08		0	SIGLEC12	-2.15662	0			13	Hu.CD328	-0.351349	0.000330754
0	VCAN	1.61163	3.49303e-113		4	CD1D	Hu.CD1d	0.36307	3.36278e-95		0	NPEPPS	-0.977198	9.23782e-255		CD4	11	Hu.CD4-RPA.T4	-0.411507	4.06048e-34		10	APOE	1.11634	3.10707e-98		FCGR3A	20	Hu.CD16	0.343019	3.00265e-06		0	ZNF331	-1.52071	6.41318e-275			16	HuMsRt.CD278	-0.382724	4.36954e-11
0	LGMN	0.974966	4.00708e-102		4	CLEC4C	Hu.CD303	0.382284	1.00996e-101		0	NQO2	-0.686371	1.24504e-235		SELL	11	Hu.CD62L	-1.19963	2.37785e-33		10	HLA-DQA1	0.619218	1.38375e-69		FCGR3A	5	Hu.CD16	0.383526	4.81775e-83		0	HBEGF	-0.628734	1.03501e-234			16	Hu.CD3-UCHT1	-0.409452	0.00187913
0	C15orf48	0.965164	3.88885e-98		4	NCR1	Hu.CD335	0.330226	1.19372e-101		0	AL390036.1	-0.601394	4.02682e-220		ITGAL	11	Hu.CD11a	-0.329462	1.6283e-25		10	C15orf48	0.809187	3.99576e-42		ITGA6	9	HuMs.CD49f	0.382545	1.99104e-20		0	CTSW	-0.826148	1.55796e-228			16	Hu.CD196	-0.396988	0.0175341
0	MARVELD1	0.683653	2.04503e-94		4	PTPRC	Hu.CD45RA	0.421043	1.70084e-74		0	TNNT1	-1.34305	8.015e-204		ITGAL	11	HuMs.CD44	-0.359632	3.5465e-23		10	PMP22	0.76024	2.2464e-30								0	ITIH5	-0.899313	2.76726e-215			19	Hu.CD11b	-0.377089	1.58568e-14
0	AL138963.3	0.947831	4.55919e-93		4	CD48	Hu.CD48	0.578291	2.0551e-36		0	SLC19A3	-0.599588	2.74032e-185		ICOS	11	HuMsRt.CD278	-0.389639	2.61832e-19		10	BCAT1	1.00397	2.46314e-22								0	BHLHE41	-0.624404	2.13407e-214			19	Hu.CD54	-0.357011	5.66758e-13
0	PDK4	0.71465	1.39868e-91		4	ITGA6	HuMs.CD49f	0.449079	1.00575e-160		0	IPCEF1	-1.35323	9.60666e-180		SIGLEC7	11	Hu.CD328	-0.860606	3.49811e-19		10	ABI3	0.631182	2.41871e-21								0	AL161740.1	-1.46907	2.32808e-212			19	Hu.CD11c	-0.363543	2.95084e-12
0	BCAT1	0.978378	2.41917e-86		5	CD48	Hu.CD48	0.37807	1.2662e-43		0	SSPN	-1.14127	7.14122e-176		ITGAX	11	Hu.CD11c	-0.506687	1.5119e-12		10	SLC1A7	0.93418	1.00849e-19								0	CPE	-0.71743	1.49622e-207			19	Hu.HLA.ABC	-0.378576	1.41795e-11
0	SORL1	0.803791	3.43706e-80		6	ENG	Hu.CD105-43A3	0.521197	3.67112e-100		0	IFIT1	-0.637169	1.352e-173		CD5	11	Hu.CD5	-0.397759	4.0014e-12		10	FAM213A	0.70528	3.41981e-19								0	ID3	-0.950828	7.60966e-195			19	Hu.CD319	-0.394827	1.40921e-09
0	BEST1	0.699049	1.6131e-78		6	NECTIN2	Hu.CD112	0.480951	1.01907e-136		0	IGF1	-1.32309	1.10317e-164		CD86	11	Hu.CD86	-0.376574	1.44605e-10		10	FPR3	0.662858	5.77644e-19								0	ITGB8	-0.950019	4.00742e-193			19	Hu.CD3-UCHT1	-0.583063	1.09607e-07
0	DUSP6	0.741931	1.20215e-73		6	IL2RB	Hu.CD122	0.326679	7.56168e-30		0	MGAT3	-0.624806	5.13116e-155		FCGR1A	11	Hu.CD64	-0.45294	7.77586e-09		10	L1TD1	1.05907	1.78435e-16								0	IFI44L	-0.764074	5.62675e-185			19	Hu.CD40	-0.353772	2.09352e-06
0	NAIP	0.809874	8.28403e-68		6	CD14	Hu.CD14-M5E2	0.362195	7.71838e-17		0	SULT1A1	-0.705844	1.27932e-154		CR1	11	Hu.CD35	-0.37992	1.03432e-07		10	FAS	1.10902	5.83488e-16								0	ITSN1	-1.12551	1.53837e-174			19	Hu.CD62P	-0.44224	1.79046e-05
0	AMZ1	0.859442	7.71443e-64		6	MCAM	Hu.CD146	0.427413	2.21803e-16		0	AC022509.2	-1.53993	6.34832e-152		CD27	11	Hu.CD27	-0.426457	4.69591e-05		10	HOMER2	1.06744	2.04264e-14								0	APBB2	-1.09217	8.15529e-152			19	Hu.CD49a	-0.354987	2.54977e-05
0	MAP3K7CL	0.997152	2.10379e-60		6	KIR2DL1	Hu.CD158	0.815494	1.301e-192		0	ZNF365	-0.91696	5.0016e-151		CD33	11	Hu.CD33	-0.410916	0.000166742		10	AP002954.1	1.04949	3.38083e-14								0	HLA-DQB2	-0.658147	1.4154e-146			19	Hu.CD103	-0.363828	0.000197746
0	AQP9	0.639956	3.01201e-60		6	KIR2DL3	Hu.CD158b	0.428281	9.64333e-45		0	AC020656.1	-0.764262	3.76259e-150		SIGLEC7	13	Hu.CD328	-0.417534	4.81313e-05		10	ZNF880	0.700445	3.72428e-14								0	SLC47A1	-0.619256	1.70283e-144			19	Hu.CD328	-0.336258	0.008155
0	ZFP36L1	0.703167	3.05007e-58		6	CXCR5	Hu.CD185	0.75007	2.57487e-200		0	HSD17B14	-0.6343	6.11115e-149		ICOS	16	HuMsRt.CD278	-0.44914	1.3545e-12		10	CCL18	0.651836	1.19604e-13								0	JUNB	-0.607288	5.44118e-143			19	Isotype-RTK4530	-0.341103	0.0098732
0	NRGN	0.711158	1.22165e-57		6	CD19	Hu.CD19	0.323342	1.93174e-12		0	ECSCR	-0.664349	1.44958e-147		ITGAL	16	Hu.CD11a	-0.340779	2.1768e-12		10	NR1D2	0.615731	4.17756e-13								0	ADGRE3	-0.974353	6.81418e-141			2	Hu.CD328	-0.347931	3.72877e-51
0	AC007298.1	0.895091	4.63662e-56		6	CCR4	Hu.CD194	0.937892	3.38625e-201		0	NRP2	-0.910963	1.23521e-142		CD47	16	Hu.CD47	-0.327307	4.63764e-10		10	AC007298.1	0.929999	3.64216e-12								0	TNNT1	-0.942564	5.78137e-140			20	Hu.CD45RA	-0.346441	3.23832e-07
0	THOC3	0.624068	3.44012e-54		6	CCR5	Hu.CD195	0.417193	2.46112e-77		0	RBP4	-0.776158	2.84163e-141		ITGAX	16	Hu.CD11c	-0.501204	1.96178e-09		10	DNASE2B	0.799908	5.71256e-12								0	RSPO3	-1.13467	7.87038e-137			20	Hu.CD328	-0.410663	6.26343e-05
0	VGLL3	0.917669	1.01344e-51		6	CCR6	Hu.CD196	0.447395	7.96039e-23		0	KCNAB1	-0.60489	5.89803e-141		FCGR1A	16	Hu.CD64	-0.407851	4.42611e-08		10	MIR155HG	0.83562	8.41041e-10								0	CA2	-0.676747	2.4601e-129			20	Hu.CD196	-0.398376	0.000605719
0	ACTA2	0.660508	1.90932e-47		6	CD1D	Hu.CD1d	0.782381	7.1977e-178		0	TCEA3	-0.701667	3.4478e-132		CD163	16	Hu.CD163	-0.337493	7.24215e-08		10	YBEY	0.694229	1.89306e-09								0	SYNGR1	-1.0214	4.46494e-125			3	Hu.CD328	-0.397798	6.66073e-85
0	CXCL2	0.8341	2.07381e-45		6	MS4A1	Hu.CD20-2H7	0.581673	5.42873e-52		0	C11orf21	-1.02852	1.03835e-127		SIGLEC7	16	Hu.CD328	-0.514894	6.6312e-06		10	UQCRHL	0.593533	7.6213e-08								0	THBS1	-1.1886	1.74983e-120			4	HuMsRt.CD278	-0.375078	1.46598e-131
0	SLC1A7	0.72457	7.78892e-45		6	CR2	Hu.CD21	0.599867	1.58947e-13		0	SNAI3	-1.00214	1.52007e-125		CD33	16	Hu.CD33	-0.36262	0.00330896		10	PSPH	0.626734	2.43205e-07								0	IGFBP2	-0.707559	1.61628e-118			4	Hu.CD328	-0.353839	1.64181e-36
0	HIST1H1E	0.760784	3.68178e-43		6	CD226	Hu.CD226-11A8	0.588902	3.78701e-269		0	TMEM91	-0.655753	8.07913e-114		SELL	16	Hu.CD62L	-0.712375	0.0253716		10	ICAM4	0.78133	5.26053e-06								0	NPEPPS	-0.721044	1.63184e-117			6	Hu.CD270	-0.347265	5.50606e-139
0	AL138828.1	0.662326	7.86937e-33		6	CD24	Hu.CD24	0.376045	4.71951e-68		0	SIGLEC12	-1.11328	1.78183e-112		SLAMF7	19	Hu.CD319	-0.562786	2.95509e-16		10	ADGRE2	0.624646	1.56752e-05								0	AC019183.1	-0.84301	1.67762e-111			6	Hu.CD226-11A8	-0.392107	4.41157e-134
0	TES	0.610699	2.2341e-29		6	IL2RA	Hu.CD25	0.550786	2.93094e-119		0	RSPO3	-0.717551	9.85392e-104		CD3	19	Hu.CD3-UCHT1	-0.683217	9.65203e-10		10	CXCL8	0.701999	0.000998579								0	IGF1	-1.49567	3.1705e-106			6	Hu.CX3CR1	-0.372941	1.09563e-131
0	SLC16A10	1.27815	7.1267e-28		6	TNFRSF13C	Hu.CD268	0.502465	1.81346e-35		0	TSPAN32	-0.768901	9.37405e-101		ITGAM	19	Hu.CD11b	-0.409352	9.81526e-10		11	HLA-DQA1	0.808177	3.6288e-62								0	SAMSN1	-0.928515	2.93726e-104			6	Hu.CD82	-0.363964	1.97655e-130
0	GSR	0.6583	1.52163e-27		6	TNFRSF14	Hu.CD270	0.507587	0		0	APBB2	-0.735665	1.59655e-99		ITGAX	19	Hu.CD11c	-0.370111	2.0723e-09		11	APOE	0.916848	5.10223e-55								0	ICOS	-1.08172	9.45436e-101			6	Hu.CD79b	-0.339961	1.95931e-128
0	MBNL2	0.599765	1.0512e-25		6	PDCD1	Hu.CD279	0.521885	6.82997e-207		0	ADCY3	-0.602509	7.20624e-95		ITGA1	19	Hu.CD49a	-0.455059	4.77736e-07		11	FCGR3A	0.591263	1.42094e-27								0	KMO	-0.636389	2.95707e-91			6	Hu.CD134	-0.492273	5.32837e-105
0	TMEM176B	0.867254	7.87507e-24		6	CD28	Hu.CD28	0.373149	1.37737e-41		0	FOLR1	-0.906369	1.11213e-94		HLA.ABC	19	Hu.HLA.ABC	-0.324286	1.63019e-05		11	HES4	1.38719	2.28098e-22								0	PDCD1LG2	-0.697621	1.92211e-89			6	Hu.CD279	-0.374725	2.6101e-93
0	NET1	0.693113	3.66316e-20		6	CLEC4C	Hu.CD303	0.765561	2.05989e-163		0	MVB12B	-0.83843	7.10017e-92		CR1	19	Hu.CD35	-0.352334	0.000413489		11	SIRPB1	0.780444	8.50023e-11								0	ARMH1	-0.593536	6.68458e-89			6	Hu.CD83	-0.323956	7.43523e-90
0	SIPA1L1	0.678304	1.06457e-19		6	NCR1	Hu.CD335	0.646679	1.02315e-147		0	ANGPT4	-0.748761	1.04403e-88		SIGLEC1	2	Hu.CD169	-0.352682	0		11	CCL18	0.692644	1.48046e-10								0	OVCH1	-0.638861	5.64155e-88			6	Hu.CD223	-0.532988	2.00194e-80
0	IFRD1	1.08042	3.61741e-14		6	SLAMF6	Hu.CD352	0.325861	3.77342e-43		0	TDRD3	-0.809936	1.74917e-88		C5AR1	2	Hu.CD88	-0.358033	0		11	FAM213A	1.19516	2.34563e-08								0	SLC7A8	-0.609387	3.49779e-81			6	Hu.CD319	-0.704594	9.36504e-79
0	CREM	0.623796	4.19386e-08		6	GP1BB	Hu.CD42b	0.370639	1.13897e-07		0	CATSPER1	-0.590304	7.18011e-87		ITGAL	2	Hu.CD11a	-0.46806	2.06341e-305		11	ID2	0.709063	6.23866e-07								0	KCNAB1	-0.670299	8.15397e-80			6	Hu.CD52	-0.438301	4.52671e-71
10	AHNAK	0.598413	5.23253e-20		6	PTPRC	Hu.CD45RA	0.850997	3.11757e-131		0	CMPK2	-0.661436	1.45586e-83		ITGB2	2	Hu.CD18	-0.461641	1.39305e-249		11	CD36	0.778808	0.000165935								0	CD69	-0.755774	4.25587e-78			6	Hu.CD244	-0.461986	2.32069e-69
10	ZFP36	0.646636	7.1885e-11		6	CD48	Hu.CD48	0.863785	1.18145e-36		0	SCARB1	-0.766582	1.46425e-79		ICOS	2	HuMsRt.CD278	-0.466144	6.95229e-211		11	ABCC3	0.601029	0.000353732								0	TSPAN32	-0.628172	7.64242e-77			6	Hu.CD155	-0.393819	1.16295e-66
10	ACTA2	1.38594	1.12047e-10		6	CD5	Hu.CD5	0.369418	4.33618e-15		0	KPTN	-0.697278	7.22846e-75		FCGR2A	2	Hu.CD32	-0.398172	2.59662e-199		11	FAS	0.647215	0.000810004								0	CHRM3	-0.725042	4.11673e-72			6	Hu.CD224	-0.339162	2.78296e-65
10	GSTM1	1.32637	2.78942e-10		6	NCAM1	Hu.CD56	0.436312	1.38657e-27		0	TENM4	-0.821212	2.60308e-70		FCGR1A	2	Hu.CD64	-0.459931	1.61877e-187		11	MRAS	0.659313	0.00214882								0	JAKMIP2	-0.615611	6.59978e-72			6	Hu.CD163	-0.457731	1.95764e-63
10	SPOCD1	0.988864	9.38747e-10		6	B3GAT1	Hu.CD57	0.536054	2.51788e-74		0	SLC24A4	-0.734003	8.42324e-70		CD47	2	Hu.CD47	-0.357041	6.62889e-158		11	BOLA2-SMG1P6	0.625044	0.0269882								0	C11orf21	-0.675151	1.73399e-70			6	Hu.CD3-UCHT1	-0.791169	6.84803e-63
10	CYTIP	0.774791	1.04192e-08		6	SELL	Hu.CD62L	0.430065	1.82572e-08		0	HLA-G	-0.626683	7.28447e-66		ITGAX	2	Hu.CD11c	-0.456478	2.38341e-152		11	CYB5R2	0.659602	0.0373247								0	RETREG1	-0.622877	5.85381e-69			6	Hu.CD196	-0.736652	3.72786e-62
10	PRKAR1B	0.858889	2.12643e-06		6	CD79B	Hu.CD79b	0.644123	0		0	ZCCHC24	-0.728096	3.1861e-65		SIGLEC7	2	Hu.CD328	-0.615156	2.29182e-139		16	APOE	0.766354	1.5965e-13								0	FAM49A	-0.612085	1.92792e-68			6	Hu.CD94	-0.464733	1.23289e-61
10	PMP22	0.779744	4.71713e-06		6	CD82	Hu.CD82	0.328624	5.56873e-87		0	ICOS	-0.687113	2.15826e-64		CD163	2	Hu.CD163	-0.334261	1.87728e-124		16	PMP22	0.762012	1.02344e-06								0	MVB12B	-0.843947	7.06807e-67			6	Hu.CD352	-0.359187	1.04605e-60
10	CCL4	1.53007	1.06502e-05		6	CD83	Hu.CD83	0.364441	4.20004e-111		0	NR1D2	-0.626541	2.327e-64		CD44	2	HuMs.CD44	-0.356339	3.05193e-124		16	SLC2A6	0.710433	1.68101e-06								0	DTNA	-0.852547	1.33056e-66			6	Hu.CD122	-0.481597	8.46278e-60
10	FAS	0.831853	2.09941e-05		6	KLRD1	Hu.CD94	0.396793	7.76048e-46		0	SYNGR1	-1.0135	4.58154e-55		CR1	2	Hu.CD35	-0.459062	1.70267e-123		16	ITGAE	0.630659	3.33799e-06								0	SSPN	-0.648813	6.02413e-63			6	HuMsRt.CD278	-0.427274	8.71759e-57
10	TES	0.85007	2.13359e-05		6	FAS	Hu.CD95	0.377076	3.32621e-81		0	IGFBP2	-0.713219	9.19851e-53		PTPRC	2	Hu.CD45-HI30	-0.339895	4.87959e-119		16	C11orf71	0.869094	4.79933e-05								0	NFIL3	-0.631544	1.1764e-53			6	Hu.CD81	-0.352872	4.20771e-55
10	ZFP36L1	0.898076	4.9675e-05		6	FCER1A	Hu.FceRIa	0.3703	1.97287e-28		0	FGL2	-0.676615	6.14084e-45		SLAMF7	2	Hu.CD319	-0.372906	2.18281e-102		16	PPM1N	1.32024	5.35105e-05								0	HLA-DQA2	-0.59884	3.961e-53			6	Hu.CD23	-0.361109	1.3626e-51
10	HIST1H1E	0.849093	6.33555e-05		6	HLA-E	Hu.HLA.E	0.326792	1.56373e-69		0	PEX11A	-0.716972	5.57806e-44		ITGA1	2	Hu.CD49a	-0.416314	2.86732e-99		16	SPATA20	0.753184	5.56604e-05								0	CACNB3	-0.641955	6.6387e-51			6	Isotype-MOPC.173	-0.336403	1.67469e-51
10	CKLF	0.629689	7.45034e-05		6	IGHD	Hu.IgD	0.582854	1.43993e-16		0	POMC	-0.650935	1.09886e-41		HLA.ABC	2	Hu.HLA.ABC	-0.339522	1.60143e-92		16	BOLA2-SMG1P6	0.779305	0.00304233								0	WDR49	-0.691538	1.34736e-50			6	Hu.CD314	-0.369259	1.26704e-49
10	LINC00854	1.47895	0.000113061		6	KLRG1	Hu.KLRG1	0.330867	8.58182e-28		0	COL9A2	-0.613429	6.22621e-40		CD33	2	Hu.CD33	-0.347085	1.82075e-62		16	CAVIN3	0.924713	0.00726257								0	CREM	-0.614156	9.2106e-42			6	Hu.CD169	-0.357538	1.81947e-49
10	NME1	0.864831	0.000133163		6	TIGIT	Hu.TIGIT	0.598506	2.0133e-294		0	LTB4R	-0.65151	2.72834e-38		ITGAL	20	Hu.CD11a	-0.575671	9.44467e-29		16	MMP2-AS1	0.788529	0.00947977								0	CRIM1	-0.606142	3.86597e-37			6	Hu.IgM	-0.422426	9.69201e-49
10	AGO2	0.785214	0.000178503		8	CCR4	Hu.CD194	0.46963	3.07722e-23		0	DGKQ	-0.641071	6.00174e-35		ITGB2	20	Hu.CD18	-0.487195	3.57914e-16		16	GSTM1	0.947785	0.00996481								0	LINC02328	-0.655215	3.02988e-33			6	Hu.CD49d	-0.395842	2.01698e-47
10	AQP9	0.778089	0.00025142		9	ENG	Hu.CD105-43A3	0.336054	1.43151e-11		0	PVALB	-0.60411	8.57724e-35		CD47	20	Hu.CD47	-0.377914	1.10188e-11		16	CXCL8	0.86801	0.011021								0	AKR1C2	-0.650401	1.10559e-32			6	Hu.KLRG1	-0.41531	2.88881e-47
10	AL138963.3	0.961206	0.000310971		9	CCR4	Hu.CD194	0.428345	3.63421e-08		0	NSUN7	-0.590971	5.24772e-34		PECAM1	20	Hu.CD31	-0.366073	3.67998e-10		16	RASL11A	0.696119	0.0331961								0	MXD1	-0.640087	2.35209e-32			6	Hu.LOX.1	-0.365763	4.92645e-43
10	KLF6	0.597209	0.000315976		9	CLEC4C	Hu.CD303	0.422495	1.05487e-12		0	LINC00607	-0.606586	5.25269e-30		FCGR1A	20	Hu.CD64	-0.424007	1.09723e-09		19	HP	1.51058	1.25787e-23								0	AC090796.1	-0.591144	1.94261e-30			6	Hu.CD54	-0.364519	1.80195e-35
10	ARL4C	0.75009	0.000585194		9	PTPRC	Hu.CD45RA	0.511787	2.29868e-14		0	ZGLP1	-0.638744	2.03074e-29		ITGAX	20	Hu.CD11c	-0.450592	4.43472e-09		19	APOE	0.927278	7.87007e-21								0	CCL24	-0.748584	5.11223e-30			6	Hu.IgD	-0.680553	9.90588e-34
10	CXCR4	0.828782	0.00100457		10	CD48	Hu.CD48	0.93466	1.07047e-14		0	CSMD1	-0.67	2.7464e-18		PTPRC	20	Hu.CD45-HI30	-0.382398	1.09427e-08		19	MMP2-AS1	1.81681	4.48034e-15								0	TDRD3	-0.59065	7.23282e-26			6	Hu.CD194	-0.368739	5.22478e-32
10	FAM89B	0.681615	0.00230413		11	ENTPD1	Hu.CD39	0.438816	1.9677e-08		10	AC013457.1	-2.76995	2.34912e-42		SIGLEC7	20	Hu.CD328	-0.577787	1.73719e-06		19	GNG11	2.33459	1.72596e-12								0	FGL2	-0.744216	5.18343e-24			6	Hu.CD14-M5E2	-0.468464	7.42715e-31
10	CHST11	0.706925	0.00248779		11	CD48	Hu.CD48	0.331389	0.000233152		10	SMIM25	-0.749042	2.5608e-42		CD44	20	HuMs.CD44	-0.328771	9.34498e-06		19	HOMER2	1.64483	4.70438e-10								0	LINC00607	-0.610877	1.61136e-10			6	Hu.CD20-2H7	-0.406117	9.17566e-30
10	PHLDA1	1.1677	0.00272251		11	CD8A	Hu.CD8	0.936681	0.0026031		10	FOLR3	-1.34037	1.32667e-37		ITGA1	20	Hu.CD49a	-0.403073	1.18757e-05		19	AL138828.1	1.01798	9.78036e-09								10	FOLR3	-2.53329	6.65687e-111			6	Hu.CD28	-0.325018	1.47639e-29
10	RGS2	1.55214	0.00289678		13	CD48	Hu.CD48	0.550984	0.00473006		10	IFI6	-0.659976	6.36746e-36		CD33	20	Hu.CD33	-0.384387	0.00070947		19	RETN	0.792505	7.395e-08								10	SULT1A1	-1.15289	4.13803e-66			6	Hu.CD1c	-0.518026	7.70245e-27
10	VCAN	0.967662	0.00303321		16	B3GAT1	Hu.CD57	0.334089	5.80068e-05		10	GAPLINC	-1.23975	1.58857e-32		CR1	20	Hu.CD35	-0.344079	0.0103639		19	AL138963.3	0.826827	6.44157e-07								10	SIGLEC12	-1.88443	4.92298e-56			6	Hu.CD73	-0.391069	2.5496e-26
10	GSR	0.610837	0.0040814		19	KIR2DL1	Hu.CD158	0.350633	4.5798e-10		10	LSAMP	-0.811746	4.50512e-31		ITGAL	3	Hu.CD11a	-0.365289	4.26726e-186		19	ADGRE1	0.887038	0.000118446								10	ISG15	-0.757276	1.10592e-47			6	Hu.CD62P	-0.507914	1.36361e-25
10	ARID5B	0.900555	0.00566367		19	CCR4	Hu.CD194	0.372541	4.48812e-05		10	VMO1	-1.10338	1.66103e-28		ICOS	3	HuMsRt.CD278	-0.362082	5.08654e-142		19	VGLL3	0.685402	0.000925729								10	AC013457.1	-1.52777	2.27829e-47			6	Isotype-RTK2071	-0.390657	5.28156e-25
10	AC007952.4	0.958155	0.0119556		19	CD1D	Hu.CD1d	0.454958	2.65157e-14		10	ISG15	-0.652724	1.48251e-26		ITGB2	3	Hu.CD18	-0.323867	9.98563e-116		19	SPATA20	0.682611	0.00131435								10	PTGER3	-2.19966	2.5461e-39			6	Isotype-RTK2758	-0.378125	5.43908e-23
10	ZNF121	0.941746	0.0185361		19	CLEC4C	Hu.CD303	0.364932	8.12723e-10		10	PTGER3	-2.08732	2.28586e-22		SIGLEC7	3	Hu.CD328	-0.41528	3.33886e-70		19	RND3	0.9673	0.00661773								10	COLEC12	-0.715744	2.27441e-35			6	Hu.CD5	-0.349221	6.83552e-22
10	C3AR1	0.597631	0.0212875								10	SIGLEC1	-0.730687	5.10363e-22		SLAMF7	4	Hu.CD319	-0.464548	2.28917e-145		19	A4GALT	0.870786	0.00893888								10	GAPLINC	-1.14578	3.9892e-34			6	Hu.TCR.Vd2	-0.381648	1.21502e-17
10	TNFAIP3	1.15415	0.0255538								10	NQO2	-0.685497	4.34841e-21		ICOS	4	HuMsRt.CD278	-0.435561	3.46471e-145		19	GSTM1	1.23565	0.0101889								10	ZNF331	-1.80024	1.00309e-31			6	Hu.CD39	-0.379653	2.09268e-16
10	RHOF	0.654114	0.0356198								10	BHLHE41	-0.692562	5.48391e-21		ITGA1	4	Hu.CD49a	-0.507274	3.97837e-127		19	ICAM4	1.23407	0.0154443								10	LSAMP	-0.641894	8.57097e-31			6	Isotype-RTK4530	-0.369853	5.69601e-16
10	AC016831.7	0.960241	0.0392694								10	AL390036.1	-0.688743	2.45895e-19		ITGAX	4	Hu.CD11c	-0.333001	3.3853e-82		19	CXCL8	1.11093	0.0175905								10	ACKR3	-0.778617	1.47304e-27			6	Hu.CD328	-0.501444	2.03554e-12
10	SLC2A3	0.675587	0.0397414								10	GLDN	-0.700745	4.60906e-19		CD33	4	Hu.CD3-UCHT1	-0.40507	1.50608e-45		2	HLA-DQA1	0.697564	0								10	ITIH5	-1.39031	5.18814e-27			6	Hu.TCR.Va7.2	-0.339486	5.92622e-11
11	MTRNR2L12	0.951324	6.68541e-76								10	ADGRE1	-0.859365	6.27607e-16		SIGLEC1	5	Hu.CD169	-0.436413	0		2	APOE	0.810581	3.29664e-268								10	PRDX2	-0.848936	5.43155e-27			8	Hu.CD328	-0.487875	4.24927e-26
11	AL138963.3	1.34915	2.15996e-19								10	SULT1A1	-0.934341	8.84054e-16		SIGLEC7	5	Hu.CD328	-0.743876	1.4107e-143		2	IER2	0.624903	1.53981e-209								10	AC019183.1	-1.38183	2.77326e-26			9	Hu.IgM	-0.341425	4.02344e-12
11	MT-ND6	0.828788	1.48809e-16								10	ZNF365	-1.30683	1.00665e-15		PECAM2	5	Hu.CD31	-0.364227	2.7518e-134		2	PMP22	0.793338	3.24441e-184								10	FAM3B	-0.769383	1.78213e-25			9	Hu.CD3-UCHT1	-0.557704	3.74324e-09
11	HLA-DQA1	0.963407	1.55386e-15								10	TMEM273	-0.644059	3.95932e-15		CD86	5	Hu.CD86	-0.350949	4.00385e-88		2	SLC1A7	1.13029	5.00712e-182								10	HBEGF	-0.730928	2.8411e-24			9	Hu.CD49a	-0.349109	6.67866e-07
11	ENTPD1	1.52482	1.36569e-12								10	TCEA3	-1.02551	4.16052e-15		TFRC	6	Hu.CD71	-0.598378	0		2	GADD45B	0.673238	2.40861e-145								10	AL161740.1	-1.42835	7.43678e-24			9	Hu.CD328	-0.427074	0.000105358
11	HLA-DQB1	0.594709	8.82371e-10								10	RBP7	-0.971491	4.70377e-15		LAMP1	6	Hu.CD107a	-0.507949	4.29298e-160		2	TNF	1.02176	1.92225e-122								10	CPE	-0.692439	1.88344e-22
11	MRC1	1.2237	4.84749e-08								10	CLEC4A	-0.67427	7.48085e-15		ITGAX	6	Hu.CD11c	-1.21334	3.758e-150		2	C15orf48	0.73054	6.55329e-106								10	HLA-DQB2	-0.646183	6.40294e-22
11	LINC00854	1.59274	4.61467e-06								10	KCNAB1	-1.04929	7.57041e-15		ITGAL	6	Hu.CD11a	-0.764866	1.93995e-121		2	CXCL8	0.720316	4.18453e-91								10	ADGRE3	-1.15474	3.82149e-18
11	PPT1	0.680574	0.0011295								10	AC022509.2	-1.61929	8.49771e-15		ITGB2	6	Hu.CD18	-0.913017	3.36077e-121		2	SOCS1	0.591669	2.27336e-86								10	TGM2	-0.808818	2.41627e-16
11	LTA4H	0.750174	0.00320922								10	AC020656.1	-0.897368	2.31038e-14		ITGB1	6	Hu.CD29	-0.478807	4.4767e-106		2	YBEY	0.633727	3.56626e-79								10	IPCEF1	-1.33055	3.0642e-16
11	TFRC	0.985904	0.00345865								10	IFI44L	-0.81955	1.58152e-13		CLEC12A	6	Hu.CLEC12A	-0.685398	2.1541e-98		2	ACTA2	0.773313	4.03545e-76								10	ITSN1	-1.17389	4.21887e-16
11	HOXB2	1.00756	0.00373717								10	LIN7A	-1.37668	6.80914e-13		CD81	6	Hu.CD81	-0.41149	2.51006e-87		2	BOLA2-SMG1P6	0.612973	1.361e-71								10	PRSS21	-0.976506	1.2515e-15
11	SIRPG	1.06714	0.01662								10	SLC47A1	-0.595237	7.96515e-13		CD86	6	Hu.CD86	-0.774709	1.59704e-72		2	MMP2-AS1	0.713696	6.73635e-63								10	APBB2	-1.07247	2.78331e-15
11	FCGR3A	0.774984	0.0381038								10	PDCD1LG2	-0.840083	1.03212e-12		FCGR2A	6	Hu.CD32	-0.441203	3.90821e-70		2	GSTM1	0.987017	1.08927e-43								10	SLC47A1	-0.63836	7.71127e-15
13	MARCO	0.607237	3.16715e-35								10	ITIH5	-0.943745	1.17691e-12		SIGLEC1	6	Hu.CD169	-0.324974	4.57572e-70		2	AC007298.1	0.667648	1.8553e-43								10	ITGB8	-0.838103	8.46759e-14
13	AHNAK	0.687156	4.12842e-13								10	HERC5	-0.652437	9.94793e-12		FCGR1A	6	Hu.CD64	-0.725255	8.55075e-56		2	DUSP2	0.659845	2.42977e-19								10	GPA33	-0.601171	1.87342e-13
13	PDE4DIP	0.611989	2.28276e-12								10	KANSL1-AS1	-0.853057	1.85008e-10		PECAM1	6	Hu.CD31	-0.447264	3.63204e-53		20	APOE	0.75505	1.71648e-10								10	SYNGR1	-0.785686	1.058e-12
13	KCNMA1	0.743477	1.97523e-10								10	IFIT1	-0.852279	3.70574e-10		CD44	6	HuMs.CD44	-0.51898	3.37857e-49		20	GADD45B	0.690158	1.4332e-07								10	IGFBP2	-0.843703	1.19997e-11
13	PMP22	1.02431	2.21262e-10								10	TNNT1	-0.811938	6.71943e-10		HLA.DR	6	Hu.HLA.DR	-0.360183	4.64104e-42		20	IER2	0.679909	2.59094e-06								10	KCNAB1	-0.947228	2.44936e-11
13	VCAN	1.0888	2.64155e-07								10	SSPN	-0.890571	1.57466e-09		SIGLEC7	6	Hu.CD328	-0.919246	4.3821e-41		20	CCL18	0.692468	9.29857e-05								10	S100P	-0.812126	4.05831e-11
13	GSTM1	2.03352	3.05595e-07								10	OVCH1	-0.64142	1.59991e-09		HLA.ABC	6	Hu.HLA.ABC	-0.602486	9.79031e-39		20	YBEY	0.923806	0.000109629								10	SAMSN1	-0.866845	7.96937e-11
13	DUSP6	0.927949	0.000117019								10	ECSCR	-0.874276	2.4518e-09		SLAMF7	6	Hu.CD319	-0.474055	9.94535e-34		20	BOLA2-SMG1P6	0.854029	0.00340651								10	ID3	-0.694136	1.07683e-10
13	ZFP36L1	0.654823	0.000141646								10	ARHGAP22	-0.977258	2.51563e-09		CD47	6	Hu.CD47	-0.408551	5.43155e-30		20	AL691403.1	0.629885	0.00541871								10	AKR1C2	-0.801071	4.26718e-09
13	ADGRE2	1.37413	0.00171052								10	COL9A2	-1.08524	2.65633e-09		CD33	6	Hu.CD33	-0.345687	1.04578e-09		20	NR1D2	0.617733	0.011388								10	THBS1	-1.2196	6.98451e-09
13	NAIP	0.690334	0.00200869								10	HSD17B14	-0.654841	9.80284e-09		ITGAL	8	Hu.CD11a	-0.425272	3.01396e-61		20	CXCL8	0.971519	0.012437								10	TMEM74B	-0.614661	7.18555e-09
13	SPOCD1	0.797427	0.00227533								10	ARHGAP24	-0.634582	1.34088e-08		ITGB2	8	Hu.CD18	-0.415765	2.48657e-49		3	PMP22	0.882933	3.61863e-169								10	CHRM3	-0.867611	7.73646e-09
13	ITGAE	0.605245	0.00467429								10	SCARB1	-0.86752	1.85515e-08		SIGLEC7	8	Hu.CD328	-0.71729	5.38783e-44		3	ACOT1	0.714609	1.22714e-107								10	SLC7A8	-0.724096	8.15812e-09
13	MBNL2	0.768555	0.00514573								10	LINC00970	-0.797101	2.43887e-08		CD47	8	Hu.CD47	-0.365322	9.55426e-43		3	SLC1A7	1.0737	3.64084e-103								10	SLC19A3	-0.755867	1.05276e-08
13	THOC3	0.672406	0.00627883								10	FCGR1B	-0.598642	5.26264e-08		FCGR1A	8	Hu.CD64	-0.399988	1.78369e-37		3	SLC2A6	0.678867	3.30225e-93								10	CD69	-0.959632	1.13743e-08
13	BEST1	1.08829	0.0121815								10	AL161740.1	-1.11251	5.3724e-08		ITGAX	8	Hu.CD11c	-0.398278	9.3607e-28		3	TNF	0.788915	5.4405e-55								10	TNNT1	-1.02786	3.58903e-08
13	MMP2-AS1	0.773871	0.0135079								10	PDGFD	-0.845821	9.38884e-08		ICOS	8	HuMsRt.CD278	-0.344298	1.34051e-20		3	PHLDA2	0.642973	3.49945e-52								10	IFRD1	-0.678174	8.12133e-08
13	MAP3K7CL	1.3383	0.0160585								10	FAM3B	-0.643112	1.0003e-07		CD81	9	Hu.CD81	-0.383156	2.05632e-26		3	ACTA2	0.603962	9.82943e-45								10	LIN7A	-0.704554	8.54096e-08
13	CXCL2	0.847712	0.0185316								10	SLC19A3	-0.678591	1.33122e-07		TFRC	9	Hu.CD71	-0.351675	1.63556e-24		3	CXCL8	0.796791	4.02266e-37								10	ICOS	-0.980862	1.81609e-07
13	SLC2A3	1.02795	0.0399804								10	TMEM91	-0.819003	2.19122e-07		CD101	9	Hu.CD101	-0.361525	3.08767e-24		3	GSTM1	0.608966	3.41134e-06								10	RAB11FIP4	-0.883671	2.95762e-07
13	NBPF14	0.703903	0.0498112								10	SIGLEC12	-1.07536	2.36041e-07		LAMP1	9	Hu.CD107a	-0.414737	7.5762e-24		4	APOE	0.76235	1.07427e-198								10	NFIL3	-0.739311	5.50538e-07
13	PPP3CA	0.642016	0.049947								10	HLA-G	-0.769092	4.8625e-07		ITGB2	9	Hu.CD18	-0.589831	1.07204e-22		4	PMP22	0.860193	7.97036e-126								10	OVCH1	-0.747697	8.46455e-06
16	MARCO	0.706206	1.14324e-17								10	PKD2L1	-0.892658	1.42069e-06		ITGAL	9	Hu.CD11a	-0.546038	1.37752e-22		4	AL138963.3	0.77048	2.22647e-110								10	PKD2L1	-0.661374	0.000638221
16	LYZ	0.603445	3.1871e-07								10	LAIR1	-1.25443	2.80988e-06		CD29	9	Hu.CD29	-0.335408	2.96053e-19		4	C15orf48	0.622785	1.65274e-91								10	CD320	-0.709586	0.000730472
16	AL138963.3	1.58688	2.78975e-05								10	PER3	-0.859827	3.3723e-06		CD47	9	Hu.CD47	-0.422161	1.56657e-15		4	SLC1A7	0.808523	1.97171e-71								10	RPH3AL	-0.748536	0.00274785
16	GSTM1	2.03608	6.20586e-05								10	ZCCHC24	-0.69479	3.67722e-06		CLEC12A	9	Hu.CLEC12A	-0.442834	2.14021e-15		4	SLC2A6	0.638823	4.97445e-66								10	JAKMIP2	-0.592138	0.0113105
16	PMP22	1.6962	0.000553945								10	CDK18	-0.707464	5.89741e-06		ITGAX	9	Hu.CD11c	-0.544437	5.4325e-15		4	ACOT1	0.690228	3.50447e-64								10	AC090796.1	-0.65567	0.0331126
16	SPOCD1	1.16852	0.0101763								10	RBP4	-0.830938	1.27276e-05		FCGR1A	9	Hu.CD64	-0.481001	4.30081e-13		4	MMP2-AS1	0.689218	2.96284e-57								11	SULT1A1	-1.40641	1.90954e-50
19	KCNMA1	1.21005	1.27214e-17								10	RSPO3	-0.955343	2.01396e-05		SLAMF7	9	Hu.CD319	-0.410592	1.93595e-09		4	TMEM176B	0.928348	4.26493e-56								11	FOLR3	-2.08785	1.61784e-46
19	AL138828.1	1.41403	6.7083e-13								10	HLA-DQB2	-0.66676	3.09697e-05		ICOS	9	HuMsRt.CD278	-0.355838	3.09751e-09		4	AC007298.1	0.795091	2.3416e-55								11	AC019183.1	-2.83674	2.40345e-31
19	CD83	0.65363	1.48255e-09								10	C11orf21	-0.871903	4.85643e-05		HLA.ABC	9	Hu.HLA.ABC	-0.359022	3.39066e-08		4	BOLA2-SMG1P6	0.684634	4.89247e-51								11	SIGLEC12	-2.72232	7.95263e-30
19	CXCL3	1.08649	8.00008e-09								10	CD5L	-0.59009	4.85746e-05		SIGLEC7	9	Hu.CD328	-0.510959	6.39718e-07		4	CXCL8	1.15576	2.41462e-46								11	COLEC12	-0.823897	2.68996e-21
19	VGLL3	1.27586	5.12426e-08								10	CATSPER1	-0.763924	0.000113593		CR1	9	Hu.CD35	-0.413704	2.8193e-06		4	TNF	0.882468	1.92176e-38								11	HLA-DQB2	-0.856498	1.44426e-19
19	MMP2-AS1	1.4834	1.07608e-07								10	EGFL7	-0.969908	0.000115528		CD86	9	Hu.CD86	-0.345495	5.47125e-06		4	CCL18	0.604522	6.8832e-33								11	APBB2	-1.47284	1.59763e-17
19	NRP1	0.878909	2.28993e-07								10	ST5	-0.714496	0.000182291		ITGA1	9	Hu.CD49a	-0.34585	0.000905748		4	VCAN	0.64599	6.09862e-23								11	ITGB8	-1.39212	6.37234e-17
19	AMZ1	1.47427	3.25835e-07								10	DTNA	-0.75128	0.000677912								4	FP671120.1	0.965813	0.0118638								11	HLA-DQA2	-0.868653	1.33159e-16
19	GSTM1	1.17982	4.83004e-07								10	SNAI3	-0.64696	0.000845811								5	HP	0.6945	2.14266e-27								11	LSAMP	-0.696609	3.87931e-14
19	TNS1	1.76961	3.15254e-06								10	CCNG2	-0.77949	0.000865946								5	RNASE1	0.632701	1.16933e-25								11	AC013457.1	-1.51025	4.13018e-14
19	AC015912.3	1.38733	6.19904e-06								10	ANGPT4	-0.735206	0.00108776								5	FOLR2	0.657459	5.91721e-12								11	CPE	-0.78649	9.43032e-14
19	RND3	1.64855	6.54067e-06								10	ID3	-0.656764	0.0012358								6	HLA-DQA1	0.965846	3.08137e-211								11	FAM3B	-0.797061	1.33566e-13
19	CXCL2	1.13298	1.01687e-05								10	TLCD2	-0.655561	0.00137354								6	HLA-DRB5	0.678416	2.64978e-173								11	ZNF331	-1.71947	7.28286e-13
19	HP	0.699554	3.31318e-05								10	NRP2	-0.860709	0.00142654								6	APOE	0.978867	2.17414e-163								11	THBS1	-1.49219	8.81768e-13
19	ANPEP	0.599693	7.75474e-05								10	DDO	-0.621849	0.00156438								6	FN1	0.995581	1.39504e-113								11	GAPLINC	-0.943442	5.16528e-12
19	NR4A3	1.96444	0.000133842								10	KAZN	-0.609383	0.00271306								6	FCGR3A	0.634643	4.0129e-55								11	PRDX2	-0.604837	7.10787e-11
19	CCL4	0.921263	0.000276666								10	SYNGR1	-0.69797	0.0040776								6	CCL18	0.73248	5.1107e-33								11	HBEGF	-1.11229	2.11399e-10
19	PDE7B	0.904198	0.00228998								10	TPRG1-AS1	-0.964372	0.00455238								6	SECTM1	0.685061	7.99514e-11								11	ITIH5	-0.845055	4.00501e-10
19	SLC16A10	1.65771	0.00270354								11	RPS26	-0.784434	4.2912e-90								8	AL138963.3	0.703117	2.33092e-24								11	AL161740.1	-1.39012	1.14696e-09
19	C3AR1	0.798238	0.00314528								11	IFITM3	-0.96664	1.30662e-68								8	PMP22	0.729559	2.62018e-15								11	SERINC2	-0.722662	1.50596e-09
19	NAIP	0.988838	0.00570156								11	TMEM173	-1.15989	2.4531e-64								8	SLC1A7	1.14422	1.10504e-14								11	SAMSN1	-0.788153	4.89543e-09
19	IFRD1	1.48896	0.00622069								11	ISG15	-1.15138	1.50315e-50								8	VCAN	0.87261	8.81866e-13								11	ITSN1	-1.08845	1.13087e-08
19	ERI1	0.814959	0.0144179								11	ANKRD55	-2.08302	1.50565e-37								8	ACOT1	0.683882	3.69526e-11								11	ACKR3	-0.600544	2.08436e-08
19	SGK1	0.862197	0.0165924								11	TRADD	-0.685082	1.83833e-34								8	AC007298.1	0.651264	1.33651e-07								11	SESN2	-0.719826	2.85951e-08
19	APOE	0.600284	0.025661								11	NQO2	-0.799438	1.93089e-34								8	PAQR5	0.602993	3.74387e-07								11	ACSM3	-0.713693	3.0701e-08
2	MARCO	0.84896	0								11	ITGB3BP	-0.60467	5.14333e-33								8	PPM1N	0.593746	0.000184898								11	WDR49	-0.599851	1.4917e-07
2	HLA-DQA1	0.596542	0								11	MX1	-0.765816	5.90913e-32								9	MARCO	0.706946	1.08945e-35								11	TCEA3	-0.674104	1.85916e-07
2	AHNAK	0.80942	6.19515e-278								11	NUDT2	-0.601452	6.12399e-30								9	GCHFR	0.719325	1.88819e-08								11	CTSW	-0.739186	2.25594e-07
2	APOE	0.662449	3.83264e-172								11	APOLD1	-1.08588	6.54054e-30								9	ITGAE	0.738507	5.21938e-07								11	KCNAB1	-0.998818	4.432e-07
2	PDE4DIP	0.648745	6.65601e-126								11	SNHG7	-0.606489	1.79815e-28								9	SECTM1	0.775828	1.4563e-06								11	PRSS21	-1.13058	9.31147e-07
2	ANPEP	0.71928	1.27392e-120								11	XAF1	-0.640535	5.33586e-26								9	PMP22	0.749557	1.4074e-05								11	LINC00970	-0.677548	1.68376e-06
2	SPOCD1	1.25129	6.62924e-113								11	IFI44	-0.71958	8.90788e-25								9	SPOCD1	0.861118	0.00039163								11	AKR1C2	-0.692741	6.0877e-06
2	VCAN	1.46935	9.6413e-101								11	IL7R	-0.644398	1.7555e-24								9	AL138828.1	0.719488	0.024928								11	PLTP	-0.867122	1.06309e-05
2	PMP22	1.13339	1.59022e-98								11	TCF7	-1.54399	7.8329e-24								9	CFD	0.661281	0.0398115								11	CD5L	-0.64957	4.68059e-05
2	GSTM1	1.56456	6.35794e-97								11	SERINC5	-0.667681	9.19279e-23																			11	IGFBP2	-0.608758	0.00012527
2	MS4A6A	0.63683	6.09741e-96								11	SULT1A1	-0.936963	1.45509e-22																			11	PRAG1	-0.614182	0.00023579
2	CCL18	0.8316	2.27033e-94								11	MFHAS1	-0.608734	2.08208e-22																			11	RGS2	-0.860536	0.000400022
2	KCNMA1	0.905565	9.47366e-94								11	EEPD1	-0.720612	2.45703e-21																			11	ATP8B3	-0.604055	0.000882787
2	CXCL2	0.740039	2.12567e-91								11	IFI44L	-0.913509	3.65953e-21																			11	SPSB2	-0.611032	0.00201693
2	FPR3	1.09862	4.60953e-91								11	ACCS	-0.755196	5.68864e-21																			11	AC008014.1	-1.18112	0.00206321
2	LGMN	1.14077	3.32863e-84								11	FBXO34	-0.628015	6.10582e-21																			11	NOXA1	-0.784313	0.002611
2	C3AR1	0.890899	1.55121e-83								11	GIMAP4	-0.724985	6.56923e-20																			11	OVCH1	-0.645405	0.00294979
2	ITGAE	0.78847	1.62979e-64								11	RASSF3	-0.678749	2.65915e-19																			11	RETREG1	-0.686106	0.00318654
2	AQP9	0.875028	7.81415e-64								11	CBR3	-0.821114	3.32323e-19																			11	SLC19A3	-1.06084	0.00333614
2	EZR	0.635691	3.79992e-61								11	PACS1	-0.652948	4.76886e-19																			11	SOCS3	-0.639969	0.0033613
2	DEFB1	0.710088	3.11041e-60								11	USP18	-1.13283	5.37963e-19																			11	SLC7A8	-1.21231	0.00468102
2	DUSP6	0.837005	2.54176e-59								11	S1PR1	-1.12446	9.4376e-19																			11	AZU1	-1.02178	0.00525266
2	C15orf48	0.957477	1.10532e-57								11	IFI6	-0.634837	3.52344e-18																			11	MNS1	-0.640167	0.00606891
2	BCAT1	1.1643	2.72866e-55								11	EVA1B	-0.812974	4.1097e-18																			11	TGM2	-0.758953	0.00732045
2	SLC16A10	1.68147	1.5149e-53								11	CYTOR	-0.654618	6.05789e-18																			11	TRPC6	-0.714916	0.00771363
2	SLC1A7	1.12691	1.2774e-46								11	ITGA4	-0.60128	3.63006e-17																			11	SERPINI2	-0.899116	0.0124972
2	VAMP5	0.705438	2.66798e-45								11	ANK3	-0.979062	1.4956e-16																			11	CCL3	-0.894553	0.0143414
2	EREG	1.07902	4.4765e-40								11	HERC5	-0.683444	2.04998e-16																			11	DTX4	-0.667108	0.0152331
2	CYTIP	0.661153	4.47129e-36								11	GIMAP7	-0.772894	6.46169e-16																			11	ABCA1	-0.694	0.0394946
2	MARVELD1	0.663644	3.21524e-33								11	ZNF714	-0.708953	9.50175e-16																			13	FOLR3	-2.5398	1.2171e-41
2	NRGN	0.853214	7.76107e-32								11	KLF2	-0.766568	3.81471e-15																			13	SULT1A1	-1.4261	1.52837e-39
2	HIST1H1E	0.938535	2.41195e-31								11	CD84	-0.596892	5.34431e-15																			13	ISG15	-0.75158	3.85645e-28
2	ARID5B	0.874951	2.08707e-29								11	LIMS2	-0.811992	9.5026e-15																			13	CES1	-0.651481	1.7924e-21
2	MAP3K7CL	1.04911	6.01693e-28								11	GKAP1	-0.686151	1.40906e-14																			13	GAPLINC	-1.17852	1.13152e-16
2	ITGAV	0.844968	3.99547e-26								11	RIPOR2	-0.867629	1.42781e-14																			13	AC013457.1	-1.42742	4.01006e-13
2	MMP19	0.654014	2.36624e-25								11	FOLR3	-1.09682	8.99232e-14																			13	AC019183.1	-1.40382	1.1896e-11
2	CCL4L2	0.987051	1.95897e-24								11	MARCH3	-0.63013	1.60691e-13																			13	SIGLEC12	-1.84809	1.30269e-11
2	LINC00854	0.698498	2.44483e-24								11	CD5	-0.792423	1.93759e-13																			13	HLA-DQA2	-0.771334	6.59504e-11
2	ACP2	0.646534	1.27374e-23								11	TECPR1	-0.890612	2.39654e-13																			13	FAM3B	-0.742912	1.44412e-09
2	PROCR	0.627679	6.00932e-21								11	ST6GAL1	-0.667843	2.45426e-13																			13	COLEC12	-0.658357	1.86978e-09
2	THOC3	0.64193	8.06241e-21								11	SNX25	-0.943922	2.55879e-13																			13	ID3	-0.951385	8.30421e-08
2	MBNL2	0.814501	8.13445e-21								11	NBPF26	-0.776325	2.82348e-13																			13	CPE	-0.693095	8.92827e-08
2	PEA15	0.679532	9.28988e-21								11	SYCE1L	-0.720609	4.86434e-13																			13	HLA-DQB2	-0.599268	8.97465e-08
2	MMP2-AS1	1.02298	2.21928e-20								11	IFITM1	-0.798289	1.06414e-12																			13	SLC47A1	-0.66145	9.03846e-08
2	AC007298.1	0.839754	2.6725e-19								11	AC119396.1	-0.800084	1.08617e-12																			13	ZNF331	-1.23516	1.80892e-07
2	PDK4	0.599556	3.80395e-19								11	EIF4EBP3	-0.647879	4.39639e-12																			13	TNNT1	-1.16181	3.62411e-06
2	ERAP1	0.592429	4.84895e-18								11	CMTR1	-0.646939	5.1235e-12																			13	TGM2	-0.725544	3.89313e-06
2	BEST1	0.595917	1.10872e-17								11	SYTL2	-0.847105	5.2564e-12																			13	APBB2	-1.19582	5.66584e-05
2	YBEY	0.646826	1.10884e-16								11	RDM1	-1.03055	6.63792e-12																			13	AL161740.1	-1.35379	0.000108673
2	HPSE	0.857501	4.13102e-16								11	LDLR	-0.84321	7.11299e-12																			13	JAKMIP2	-0.677165	0.000192802
2	FAS	0.706784	3.36844e-15								11	FCMR	-0.964044	8.02732e-12																			13	LIN7A	-1.1652	0.000233983
2	RNASE6	0.591303	6.7933e-15								11	TNFRSF25	-0.733859	1.95401e-11																			13	ITIH5	-0.732998	0.000277927
2	KAZALD1	0.739833	1.53407e-14								11	DUSP18	-0.650343	1.98045e-11																			13	AP000547.3	-0.811017	0.000369749
2	SIPA1L1	0.907828	2.80067e-13								11	HYLS1	-0.746257	2.85013e-11																			13	CTSW	-0.642037	0.000733042
2	MXD1	0.853254	2.80878e-12								11	PXN	-1.07354	3.06165e-11																			13	ADGRE3	-0.915787	0.000905077
2	PHLDA1	0.693808	6.22059e-10								11	HSBP1L1	-0.621756	3.65133e-11																			13	AKR1C2	-0.830442	0.00230679
2	DOCK4	0.834981	6.40605e-10								11	PHF7	-0.617708	4.50782e-11																			13	SAMSN1	-0.847363	0.00329244
2	RGS2	1.02209	2.39198e-08								11	TMEM204	-0.714863	5.37577e-11																			13	RAB11FIP4	-0.97465	0.00572394
2	CCDC186	0.703619	3.8431e-08								11	MDK	-0.940645	5.68108e-11																			13	AC020656.1	-0.66948	0.0224014
2	PATL2	0.749571	1.02691e-07								11	PIMREG	-0.636546	6.5456e-11																			13	ANGPT4	-0.863102	0.0240956
2	GSR	0.672556	6.85234e-07								11	DGKA	-0.685766	6.88592e-11																			16	RPS26	-0.676932	2.52812e-22
2	FP671120.1	0.824291	6.83508e-05								11	TPTEP2-CSNK1E	-0.613054	1.09837e-10																			16	LSAMP	-0.772698	4.17865e-15
20	HLA-DQA1	0.605131	1.37694e-14								11	TESMIN	-0.873244	1.10517e-10																			16	AC013457.1	-1.78708	1.76226e-14
20	AHNAK	0.653321	6.59268e-11								11	GIMAP8	-0.656676	1.18394e-10																			16	MTRNR2L12	-0.60055	6.42301e-09
20	TPM4	0.662092	7.60453e-07								11	ZNF101	-0.604014	1.26717e-10																			16	FOLR3	-1.68168	4.48741e-08
20	CCL18	0.600527	1.24038e-05								11	PASK	-0.910137	3.9822e-10																			16	TGM2	-0.786942	1.08364e-07
20	VCAN	1.08796	0.000223824								11	TMEM220	-0.736638	5.21613e-10																			16	SULT1A1	-0.955263	9.13826e-07
20	LGMN	1.43726	0.000309758								11	BCL9L	-0.935533	1.0667e-09																			16	SIGLEC12	-1.82236	5.81177e-06
20	MAFB	0.759607	0.0018074								11	RTP4	-0.672729	1.36116e-09																			16	COLEC12	-0.94095	5.91366e-06
20	BCAT1	1.36538	0.0136323								11	TESPA1	-0.605134	1.99047e-09																			16	GAPLINC	-1.17133	9.03023e-06
20	CD86	0.599717	0.0194456								11	KIAA0825	-0.68434	2.44326e-09																			16	ZNF331	-1.65742	1.00553e-05
20	FPR3	0.792122	0.0214963								11	SMAD3	-0.828354	3.16848e-09																			16	ITIH5	-1.26737	1.25529e-05
3	AHNAK	0.807791	6.37625e-204								11	SLC29A3	-0.805832	3.26729e-09																			16	CTSW	-0.93746	1.42937e-05
3	SDC2	1.95692	7.46138e-135								11	LRRC8A	-0.596915	3.36139e-09																			16	SLC47A1	-0.818592	0.000155907
3	ANPEP	0.768529	7.70119e-114								11	CPTP	-0.590519	3.52599e-09																			16	ID3	-1.14227	0.000571916
3	FPR3	0.845198	2.27002e-86								11	ABLIM1	-0.778296	4.89343e-09																			16	KCNAB1	-1.35056	0.00291826
3	C3AR1	0.83352	3.70332e-86								11	GPR171	-0.691718	9.0847e-09																			16	ITGB8	-1.09109	0.00303574
3	KCNMA1	0.657858	2.25741e-76								11	AC084033.3	-0.666718	1.23132e-08																			19	RPS26	-0.830893	4.60028e-52
3	LGMN	0.819902	1.5569e-73								11	SPOCK2	-0.605653	1.29946e-08																			19	COL1A1	-8.26302	5.67187e-34
3	PMP22	1.13057	2.76165e-73								11	PVT1	-0.62872	1.41362e-08																			19	NPEPPS	-1.23939	1.66112e-29
3	CCL18	0.591699	6.91217e-73								11	GIMAP6	-0.721143	1.60496e-08																			19	ERAP2	-0.838436	2.91199e-26
3	AMZ1	0.975417	2.58827e-66								11	PLTP	-0.612017	1.66825e-08																			19	AC013457.1	-2.07065	2.73843e-24
3	TNS1	1.09608	6.74247e-65								11	PIF1	-0.679187	3.2387e-08																			19	NQO2	-0.722822	8.41505e-22
3	GSTM1	1.14328	4.1651e-60								11	SYTL1	-0.593072	4.97822e-08																			19	CAMK1D	-0.75752	2.07185e-19
3	SPOCD1	0.931253	9.59203e-56								11	IFFO2	-0.599345	1.43264e-07																			19	FOLR3	-2.05419	1.04067e-18
3	VAMP5	0.86067	2.44441e-51								11	SPSB2	-0.754403	1.70524e-07																			19	SULT1A1	-0.926784	1.50237e-17
3	BCAT1	0.852871	2.11287e-49								11	RINL	-0.596365	3.05246e-07																			19	FGL2	-1.32006	7.03091e-17
3	VCAN	1.406	2.63501e-49								11	VMO1	-0.65157	6.48507e-07																			19	ARHGAP26	-0.758933	3.68178e-15
3	AQP9	0.621097	3.94135e-49								11	HLA-DQA2	-0.732062	1.26863e-06																			19	FN1	-0.710075	4.0896e-13
3	ITGAM	0.760831	1.46628e-47								11	CCDC15	-0.877774	1.4517e-06																			19	CD163	-0.611202	1.00951e-12
3	PDLIM7	0.637248	1.29844e-46								11	HERC6	-0.696948	1.53741e-06																			19	APP	-0.823354	2.20441e-11
3	MARVELD1	0.684259	1.20744e-36								11	LINC01637	-0.646638	2.69208e-06																			19	PELI1	-1.0152	1.86993e-10
3	MMP19	0.739469	4.60336e-36								11	LEF1	-0.662217	3.86262e-06																			19	AC019183.1	-1.00747	1.97249e-10
3	SLC22A15	0.647327	1.60476e-33								11	UBXN6	-0.657167	4.08706e-06																			19	MUC20-OT1	-0.762959	5.832e-10
3	DUSP6	0.743866	6.71604e-32								11	FAM185A	-0.703736	7.6628e-06																			19	RHOU	-0.76344	1.16937e-09
3	PEA15	0.649196	4.76414e-31								11	TSHZ2	-0.631196	1.28153e-05																			19	DEFB1	-0.601971	4.33181e-09
3	THOC3	0.615202	1.03482e-30								11	ISG20	-0.615488	1.44688e-05																			19	NLRP1	-0.602006	6.76344e-09
3	BEST1	0.640407	6.7416e-27								11	TTLL12	-0.69935	1.72821e-05																			19	GAS7	-0.854092	4.80426e-08
3	AL138828.1	0.655797	1.25178e-25								11	SLC26A3	-0.782008	1.77092e-05																			19	WDR49	-1.03472	6.98504e-08
3	NAIP	0.741427	8.67619e-23								11	BTBD11	-0.848251	1.97359e-05																			19	TRPS1	-0.699481	7.26612e-08
3	CCL4L2	0.915356	1.11336e-20								11	NEXN	-0.718417	2.532e-05																			19	A2M	-1.0601	9.63078e-08
3	GSR	0.75192	6.64448e-20								11	KLF16	-0.625525	7.75611e-05																			19	LFNG	-0.706838	1.48581e-07
3	ITGAV	0.620056	2.76785e-19								11	WDR59	-0.714133	0.000554405																			19	SIRPB2	-0.66651	1.09749e-06
3	HPSE	0.728003	7.45381e-19								11	FADS1	-0.678302	0.00155259																			19	ARPIN	-1.17987	1.89382e-06
3	TP53I11	0.656655	6.22608e-18								11	TESK2	-0.637134	0.00260883																			19	SSPN	-0.821858	3.04343e-06
3	AC007298.1	0.874758	3.63167e-17								11	CLIC3	-0.64181	0.00437787																			19	EPB41L4A	-0.598079	9.50511e-06
3	MMP2-AS1	0.617462	1.92485e-16								11	BX284668.5	-0.619148	0.00503393																			19	AC016831.7	-0.60668	9.64609e-06
3	SORL1	0.603546	2.15938e-16								13	AC013457.1	-3.80301	2.89919e-30																			19	ARHGAP22	-0.891263	9.8861e-06
3	CORO1A	0.651498	1.04352e-15								13	BHLHE41	-0.861299	9.3979e-15																			19	ANKRD13A	-0.607088	3.30425e-05
3	SH2D3C	0.602536	1.66471e-15								13	GAPLINC	-0.911093	3.12871e-12																			19	PDE4B	-0.594344	4.73619e-05
3	SMPDL3A	0.646335	1.89691e-15								13	TNNT1	-1.67145	3.79804e-12																			19	TNNT1	-1.06531	4.91037e-05
3	ACTA2	0.648933	2.42145e-14								13	ISG15	-0.824622	7.24884e-11																			19	ANKH	-1.03409	9.96003e-05
3	MBNL2	0.598889	1.87316e-13								13	PTGER3	-2.03894	2.19436e-10																			19	VAMP5	-0.693378	0.000394935
3	SLC1A7	0.716968	2.4263e-13								13	IFI44L	-1.06667	3.89176e-09																			19	ARMH1	-0.614187	0.000425253
3	HIST1H1E	0.697603	4.45738e-13								13	FOLR3	-0.889904	6.0797e-09																			19	PVALB	-1.18196	0.000522643
3	SLC16A10	1.11934	7.56548e-13								13	TCEA3	-1.05897	1.81089e-08																			19	CTSW	-0.687995	0.000878538
3	AC026785.2	0.81741	3.19731e-12								13	NQO2	-0.717942	2.68603e-08																			19	IL6R	-0.848716	0.00102055
3	SLC2A3	0.65329	1.53598e-11								13	IRF7	-0.714625	7.7273e-08																			19	IGFBP2	-0.884813	0.00124303
3	SYT11	0.630024	1.64753e-10								13	CTSW	-0.91658	1.2144e-07																			19	SHPRH	-0.606441	0.00166888
3	FP671120.1	0.673773	2.43906e-10								13	IFIT1	-0.661508	1.00036e-06																			19	CCNG2	-0.71849	0.00193753
3	AL138963.3	0.699059	3.68946e-10								13	IGF1	-1.3911	4.0447e-05																			19	PER2	-0.596386	0.00200551
3	MAP3K7CL	0.815494	1.08267e-09								13	SLC19A3	-0.721408	4.29881e-05																			19	RGS14	-1.00103	0.0020189
3	SAMSN1	0.596045	3.28398e-09								13	SULT1A1	-0.779484	7.01047e-05																			19	TPPP	-0.753774	0.00230095
3	SIPA1L1	0.688002	1.4542e-07								13	APBB2	-1.09181	0.000365494																			19	SERPINI2	-1.08918	0.00283732
3	TNFRSF21	0.681028	2.28501e-07								13	KCNAB1	-0.727691	0.00146536																			19	PON2	-0.672337	0.00284397
3	MXD1	0.727608	3.5644e-05								13	SEPT4	-0.616513	0.00216308																			19	LINC02256	-0.620356	0.00350802
3	DOCK5	0.625034	0.000460271								13	C11orf21	-0.795626	0.0176553																			19	ARID5B	-0.998912	0.00371374
4	MARCO	0.884712	0								13	RBP4	-0.689765	0.0210036																			19	KANSL1L	-0.731437	0.00378641
4	ANPEP	1.08033	3.86907e-154								16	AC013457.1	-3.08949	3.77557e-18																			19	AC105446.1	-0.642425	0.00515794
4	APOE	0.682034	1.64397e-115								16	BHLHE41	-0.88157	1.13568e-16																			19	GOLM1	-1.22519	0.00728754
4	CCL18	0.940197	1.53893e-110								16	GAPLINC	-0.873718	5.82879e-13																			19	MS4A14	-0.66294	0.00760701
4	PMP22	1.1457	1.68478e-89								16	AL390036.1	-0.893113	3.14994e-12																			19	LINC00607	-0.937202	0.00898073
4	SPOCD1	0.931084	3.40248e-89								16	SSPN	-1.47771	2.84922e-10																			19	CD109	-0.649213	0.00948676
4	CXCL3	1.16968	9.85344e-82								16	ESR1	-0.889173	3.56282e-10																			19	ODF3L1	-0.630557	0.0145629
4	GSTM1	1.42444	6.44871e-80								16	SYNGR1	-1.72604	1.25064e-09																			19	LINC02328	-0.73819	0.0173036
4	CXCL2	1.47068	5.73565e-79								16	NPEPPS	-0.745814	3.91346e-09																			19	NLN	-0.786889	0.026817
4	AMZ1	1.08668	1.29939e-73								16	NQO2	-0.773152	6.89544e-09																			19	MT2A	-0.667969	0.0280483
4	SECTM1	0.748284	3.00848e-65								16	SMIM25	-0.623697	8.54173e-09																			19	MAP4K4	-0.608085	0.0366296
4	FPR3	0.874164	9.48404e-57								16	HLA-G	-1.12324	1.596e-08																			19	VCL	-0.618442	0.03966
4	VCAN	1.57958	1.32888e-55								16	SIGLEC12	-1.94534	1.89764e-08																			19	PTBP2	-0.654902	0.046791
4	MMP2-AS1	1.06171	2.16533e-55								16	AC022509.2	-1.9588	2.20629e-08																			2	ISG15	-0.873196	0
4	KCNMA1	0.698645	1.41928e-52								16	TSTD1	-0.703632	4.99919e-08																			2	FOLR3	-1.9818	0
4	NFKBIA	0.629747	8.1399e-52								16	USP30-AS1	-0.599324	7.8323e-08																			2	RPS26	-0.592091	0
4	DUSP6	0.808088	2.60694e-49								16	TMEM173	-0.852982	1.38954e-07																			2	SULT1A1	-1.11865	0
4	BCAT1	1.02223	3.35747e-48								16	SEPT4	-1.20501	1.51474e-07																			2	CES1	-0.704096	1.05873e-288
4	C3AR1	0.642023	1.50756e-47								16	C11orf21	-1.56385	2.5101e-07																			2	AC013457.1	-1.53261	3.56015e-233
4	AL138828.1	0.917303	1.45573e-45								16	SLC19A3	-0.727727	5.30978e-07																			2	SIGLEC12	-1.79553	5.97819e-217
4	PRKAR1B	0.88243	8.57424e-45								16	TNNT1	-1.87996	8.97128e-07																			2	COLEC12	-0.80002	1.67173e-148
4	MARVELD1	0.666682	2.60699e-44								16	CCDC50	-0.720345	9.92391e-07																			2	GAPLINC	-1.09645	1.63613e-141
4	ITGAE	0.754401	3.53161e-44								16	IPCEF1	-0.893138	1.41788e-06																			2	FAM3B	-0.652586	2.64746e-139
4	LGMN	0.853483	2.50645e-43								16	RBP7	-1.15051	1.45733e-06																			2	ITIH5	-0.94206	2.76818e-137
4	AC007298.1	1.02188	1.30657e-41								16	FOLR3	-1.22267	3.28889e-06																			2	HLA-DQA2	-0.695623	2.03199e-124
4	MS4A6A	0.618815	3.07414e-40								16	PDCD1LG2	-0.687839	1.4388e-05																			2	ZNF331	-1.33229	5.64237e-118
4	MAP3K7CL	0.969474	5.26905e-40								16	DNMT3A	-0.628299	1.95524e-05																			2	CTSW	-0.635913	2.03775e-115
4	PHLDA1	0.985575	1.58034e-36								16	MGAT3	-0.814397	1.97107e-05																			2	IFI44L	-0.73364	3.44225e-111
4	BEST1	0.713779	1.18559e-35								16	ADCY3	-0.804166	6.00265e-05																			2	SLC47A1	-0.666027	9.77258e-108
4	NRGN	0.691699	9.81677e-35								16	MFHAS1	-0.736829	0.000271672																			2	TGM2	-0.821469	1.97055e-104
4	THOC3	0.611619	2.05533e-33								16	TSPAN32	-1.11763	0.000358623																			2	SYNGR1	-1.06289	4.22532e-95
4	SORL1	0.85059	2.21414e-33								16	LINC01506	-0.727913	0.000468443																			2	CA2	-0.696736	1.15853e-91
4	AC015912.3	0.920198	5.5738e-33								16	RTP4	-0.613347	0.0029218																			2	ID3	-0.807372	2.05444e-77
4	TCN2	0.604495	6.35134e-32								16	EPB41L4A-AS1	-0.613571	0.00303786																			2	APBB2	-0.861154	1.514e-69
4	NAIP	0.683075	7.51928e-32								16	RSPO3	-1.05293	0.00364476																			2	TNNT1	-0.863721	1.18931e-65
4	SGK1	0.660798	2.77983e-29								16	VMO1	-0.958598	0.00384678																			2	RSPO3	-1.17256	8.79376e-65
4	AQP9	0.622269	7.54691e-29								16	PTPN9	-0.590465	0.0043737																			2	ADGRE3	-0.741448	9.89178e-56
4	PEA15	0.607533	2.29796e-26								16	CSMD1	-0.984834	0.00471603																			2	ITGB8	-0.69885	3.08886e-51
4	RND3	0.995372	8.9635e-25								16	NRP2	-0.896437	0.00710013																			2	ITSN1	-0.758559	6.84207e-50
4	AC026785.2	0.976657	2.06556e-23								16	TCEA3	-0.751329	0.00825523																			2	KCNAB1	-0.793318	9.84652e-45
4	ADGRE2	0.66579	3.23718e-22								16	MUC20-OT1	-0.601332	0.00846745																			2	SYTL3	-0.811102	1.36688e-43
4	TES	0.626013	9.48381e-22								16	SNX18	-0.682566	0.00850214																			2	SAMSN1	-0.821595	4.66478e-43
4	OTUD1	0.721154	1.31957e-21								16	C2orf74	-0.603837	0.010842																			2	SOCS3	-0.754479	1.89461e-41
4	GSR	0.664004	1.55864e-18								16	APOBEC3C	-0.725766	0.013662																			2	ICOS	-0.924547	6.04667e-38
4	AL138963.3	0.733756	3.50341e-18								16	CRIM1	-0.83154	0.013696																			2	WDR49	-0.686238	2.84012e-37
4	ATP2B1-AS1	0.603238	4.56904e-18								16	C2CD5	-0.590253	0.0139854																			2	AC019183.1	-0.622868	9.87271e-37
4	ZFP36L1	0.640921	2.92822e-16								16	AC090796.1	-0.845065	0.0147565																			2	OVCH1	-0.594174	1.15142e-35
4	AKR1C3	0.59907	2.98706e-14								16	HAGHL	-0.713774	0.0222455																			2	CD69	-0.663174	2.28198e-34
4	PAPSS2	0.672669	4.55444e-14								16	CATSPER1	-0.920306	0.0306557																			2	JAKMIP2	-0.592661	1.16924e-33
4	HIST1H1E	0.699023	6.3284e-14								16	NFE2	-0.826095	0.0445536																			2	CCL24	-0.954065	3.92686e-31
4	PDK4	0.6701	8.45191e-14								16	FAM78A	-0.618506	0.0446525																			2	LIN7A	-0.643448	1.78209e-25
4	P4HA2	0.669692	8.19556e-13								19	RPS26	-0.950453	2.68664e-33																			2	ARHGAP22	-0.628205	7.78937e-25
4	TNFAIP3	0.593114	7.65497e-12								19	AC013457.1	-3.40747	7.687e-31																			2	TDRD3	-0.638298	4.00207e-21
4	MXD1	0.697388	1.02788e-11								19	COL1A1	-8.60703	4.76782e-26																			2	CRIM1	-0.636462	8.91054e-20
4	NR4A2	0.762056	3.10952e-11								19	ITGB2	-0.606682	1.09328e-22																			2	FGL2	-0.837351	6.80505e-19
4	IFRD1	1.05966	3.42726e-11								19	NPEPPS	-1.09267	7.65522e-17																			2	DTNA	-0.606569	1.31956e-15
4	SLC16A10	0.906683	4.57097e-07								19	MT-ND2	-0.61974	1.64977e-12																			2	PRMT9	-0.665303	1.25948e-11
5	MMP2-AS1	1.56979	8.96244e-100								19	BHLHE41	-0.750737	3.30708e-12																			2	THBS1	-0.88639	2.40913e-10
5	LILRA6	0.819198	2.912e-79								19	S100A13	-0.61563	3.0197e-08																			20	RPS26	-0.984239	2.81364e-38
5	MT-ND6	0.693355	3.7579e-76								19	TNNT1	-1.40146	4.11454e-08																			20	FOLR3	-2.29406	1.16877e-26
5	TMEM163	1.46461	6.32156e-62								19	NQO2	-0.633463	6.42573e-08																			20	AC013457.1	-2.91567	2.29165e-23
5	FCGR2B	0.893699	2.61064e-60								19	FOLR3	-1.04717	1.3225e-07																			20	SULT1A1	-1.31709	5.3653e-19
5	KCNMA1	0.717988	2.2206e-59								19	ISG15	-0.591983	2.89611e-07																			20	ISG15	-0.802656	1.59993e-13
5	AL138963.3	1.05227	9.5709e-50								19	ZSWIM7	-0.607131	1.30053e-05																			20	AC019183.1	-1.45896	1.39992e-09
5	PMP22	0.66187	7.44427e-49								19	TMEM18	-0.763818	1.64916e-05																			20	ZNF331	-1.33714	1.6494e-06
5	C15orf48	0.680537	1.80133e-48								19	ERAP2	-0.635299	1.90766e-05																			20	IGFBP2	-0.839599	8.3125e-06
5	FMN1	0.745992	3.89292e-48								19	MUC20-OT1	-0.847659	2.4701e-05																			20	COLEC12	-0.940405	0.00104975
5	PLA2G7	0.810617	3.20532e-46								19	AC008637.1	-1.61933	3.31793e-05																			20	GAPLINC	-1.20125	0.00155997
5	CD48	0.891277	6.00682e-42								19	FGL2	-1.25507	4.35025e-05																			20	ID3	-0.910221	0.00682235
5	FPR1	0.719217	6.45143e-39								19	CABIN1	-0.643655	0.000780607																			20	FAM3B	-0.593874	0.0180238
5	RRP7A	0.741483	5.9312e-33								19	PON2	-1.05795	0.00623773																			20	PRDX2	-0.771828	0.0221139
5	MTHFD2	0.607715	2.0145e-32								19	SSPN	-1.14759	0.00904463																			22	HLA-DQA2	-3.33741	3.84006e-60
5	LDLRAD3	0.884247	4.02493e-32								19	APP	-0.865024	0.0113858																			22	HLA-DRB5	-1.14691	5.16675e-28
5	HIST1H1E	0.737304	2.2639e-30								19	TDRD3	-0.790727	0.0119688																			22	EBI3	-2.581	1.04335e-10
5	CCL2	1.16983	1.12853e-25								19	IFI44L	-0.827667	0.0144525																			22	SNX9	-2.00418	8.911e-09
5	FAM20A	0.611541	1.14987e-24								19	TMEM220	-0.663247	0.0198319																			22	HOPX	-1.92857	5.04429e-08
5	MRPL23	0.645315	1.17235e-24								19	LAIR1	-1.40386	0.0234171																			22	CD70	-1.6687	8.3508e-06
5	BASP1	0.631763	7.48964e-24								19	DEF6	-0.870358	0.030432																			22	PLAC8	-1.70227	4.45789e-05
5	KCNN4	0.743421	3.17428e-23								19	NR1D2	-0.93876	0.0370354																			22	MARCH3	-1.64694	0.000113062
5	NME1	0.797484	4.62588e-23								19	IFIT1	-0.747771	0.0373024																			22	NPEPPS	-1.19582	0.000126169
5	PIM1	0.777972	1.46111e-21								19	PLAGL1	-0.72563	0.0405255																			22	CRIP2	-1.82658	0.000127155
5	PRKCE	0.783081	3.81762e-21								19	TSPAN32	-0.846062	0.0498708																			22	ST6GAL1	-0.934523	0.000185525
5	SLC39A8	1.30653	7.54688e-21								2	AC013457.1	-3.25035	0																			22	EZR	-0.663947	0.00018962
5	BCL2L11	0.963177	2.47759e-18								2	RPS26	-0.649063	0																			22	IGHG1	-0.999051	0.000270356
5	SDC4	0.740208	6.15851e-18								2	GAPLINC	-1.22739	4.10747e-277																			22	LARGE1	-1.73352	0.000576219
5	IL4I1	0.610675	1.35101e-15								2	FOLR3	-0.966691	6.06541e-264																			22	BACH2	-1.69235	0.000961717
5	METTL9	0.621183	1.90989e-15								2	BHLHE41	-0.788743	2.765e-253																			22	FNBP1	-0.799038	0.00251326
5	LILRB2	0.60788	1.40359e-13								2	IFI6	-0.603156	2.70099e-243																			22	PDE4D	-1.35048	0.013991
5	SLC1A3	0.638808	8.49125e-13								2	TCEA3	-1.00054	1.69472e-201																			22	ADGRE5	-0.8644	0.0143534
5	TRPM2	0.592043	1.62206e-11								2	SIGLEC1	-0.673922	5.13139e-198																			22	SKI	-1.49264	0.0187344
5	LINC00847	0.713367	1.0316e-10								2	PTGER3	-1.653	3.59318e-192																			22	PARP14	-0.850211	0.0274906
5	AC025048.4	0.627326	1.19135e-06								2	ISG15	-0.689089	4.96093e-191																			3	RPS26	-0.622116	8.02427e-284
5	LGALS2	0.603094	7.82689e-05								2	NQO2	-0.6305	5.35361e-179																			3	SULT1A1	-1.06096	6.76115e-206
6	LYZ	1.31123	0								2	KCNAB1	-0.740522	3.80734e-178																			3	FOLR3	-2.05427	3.1926e-192
6	MARCO	0.92636	1.42035e-255								2	IGF1	-1.793	1.73272e-177																			3	AC013457.1	-1.70926	2.14714e-164
6	MALAT1	0.675513	5.6303e-145								2	OVCH1	-0.611066	8.72807e-165																			3	GAPLINC	-0.899878	2.08795e-133
6	FOS	1.02491	1.91099e-117								2	SLC19A3	-0.641368	1.3545e-159																			3	FAM3B	-0.623298	7.56751e-113
6	DDX5	0.819861	1.09157e-85								2	CTSW	-0.732278	1.65453e-158																			3	COLEC12	-0.792379	6.44789e-111
6	MT-ATP8	0.60391	2.32745e-72								2	SLC1A5	-0.599137	3.61548e-158																			3	ZNF331	-1.43098	1.4411e-108
6	CXCL3	1.54741	4.86908e-66								2	RBP4	-1.05694	2.7763e-150																			3	A2M	-1.14511	9.21606e-108
6	JUN	0.820681	7.66924e-64								2	RETN	-0.707683	4.78751e-149																			3	CPE	-0.626113	3.64169e-103
6	AL138963.3	1.15286	1.44289e-63								2	IFI44L	-0.893251	1.45175e-147																			3	SLC47A1	-0.629778	1.89898e-89
6	ZFP36	1.06526	6.43942e-61								2	SIGLEC12	-1.24282	2.92151e-143																			3	ITIH5	-0.969508	2.30812e-89
6	NFKBIA	1.11994	2.8163e-55								2	RSPO3	-1.07049	1.99316e-140																			3	CTSW	-0.804287	3.1631e-86
6	IER2	1.1992	9.90253e-53								2	IPCEF1	-1.21437	4.99353e-138																			3	KCNAB1	-0.907241	1.93381e-72
6	STXBP2	0.592033	4.9115e-51								2	FAM3B	-0.657154	1.05029e-130																			3	HLA-DQA2	-0.59902	3.30396e-72
6	DUSP1	0.675509	4.42412e-42								2	ECSCR	-0.638959	1.47399e-130																			3	AC020656.1	-0.709636	7.39394e-69
6	AHNAK	0.627278	1.75288e-38								2	IFIT1	-0.657499	3.62884e-125																			3	SYNGR1	-1.01462	7.77626e-66
6	JUNB	0.591616	1.87486e-31								2	ADGRE1	-0.632432	7.83427e-119																			3	TGM2	-0.699764	6.81385e-64
6	PNRC1	0.656915	1.21839e-30								2	RBP7	-0.721173	9.19422e-118																			3	AC107884.1	-0.86801	5.8024e-56
6	PLD3	0.624811	3.54977e-27								2	SNAI3	-1.03815	5.76403e-117																			3	TDRD3	-1.09799	4.87165e-52
6	HIST1H1E	0.747106	4.32376e-25								2	AC020656.1	-0.718916	8.35292e-116																			3	TPD52L1	-0.993388	4.44422e-46
6	PPP1R15A	0.900198	9.01774e-24								2	TMEM220	-0.602915	1.76595e-115																			3	LINC01857	-0.973566	9.74988e-40
6	PECAM1	0.615149	1.59e-22								2	SSPN	-0.899348	3.87454e-115																			3	AC019183.1	-0.732053	1.21326e-38
6	SRSF2	0.767982	1.20995e-21								2	AC022509.2	-1.03853	6.62229e-112																			3	ITSN1	-0.763668	2.82518e-38
6	MCL1	0.621865	4.46805e-21								2	TNNT1	-1.10288	9.00622e-112																			3	SYTL3	-0.79695	8.63472e-38
6	TGFBI	0.687908	3.31979e-20								2	MYB	-0.672844	3.3347e-107																			3	TSPAN32	-0.760907	4.85234e-36
6	CD83	0.697221	6.60004e-19								2	BIN1	-0.667226	1.37868e-106																			3	IGFBP2	-0.645813	5.4245e-35
6	BEST1	0.840797	2.19019e-17								2	SCARB1	-0.899025	1.76094e-104																			3	HES2	-0.624034	7.36463e-34
6	PDE4DIP	0.747773	1.28579e-13								2	ZNF365	-0.765909	5.00882e-100																			3	APBB2	-0.790249	1.75323e-32
6	RHOB	0.631493	1.46864e-13								2	TENM4	-0.948071	6.44775e-99																			3	SAMSN1	-0.89794	1.93808e-27
6	ZFAND5	0.654997	2.47233e-13								2	MPV17L2	-0.816592	4.23921e-98																			3	PLTP	-0.868468	1.09921e-25
6	SLC16A3	0.639446	3.77121e-11								2	KANSL1-AS1	-0.781129	1.13338e-95																			3	ID3	-0.61119	4.365e-23
6	SRSF7	0.71555	1.68454e-10								2	ZCCHC24	-0.827837	2.85489e-95																			3	ZNF358	-0.656051	1.29644e-20
6	DST	0.668474	1.3705e-08								2	NR1D2	-0.677892	3.80702e-84																			3	NR4A2	-0.721415	4.34988e-19
8	MARCO	0.788121	3.52162e-126								2	SUSD3	-0.634018	1.48465e-81																			3	VCL	-0.620125	5.93739e-17
8	AC019183.1	1.11453	5.32059e-17								2	IER3	-0.94919	1.53345e-78																			3	CXCR4	-0.788184	3.79261e-16
8	POU2F2	1.49632	4.18574e-10								2	DBP	-0.762424	3.57179e-78																			3	THBS1	-1.06563	1.91791e-11
8	ADGRE2	1.07569	1.83176e-09								2	COL9A2	-0.863588	9.58154e-72																			3	CEBPD	-0.630761	3.67804e-11
8	TNFAIP6	0.821944	7.75941e-09								2	C11orf21	-0.774378	4.18717e-71																			3	SLC16A10	-0.595458	2.58184e-08
8	PMP22	1.11359	5.01096e-08								2	NRP2	-0.849288	4.07307e-70																			3	NR4A1	-0.895372	2.51602e-06
8	VCAN	0.963459	1.41492e-07								2	ICOS	-0.708202	1.73674e-68																			4	ISG15	-0.866691	0
8	FKBP5	0.691031	3.69991e-07								2	ANGPT4	-0.694697	7.20337e-68																			4	RPS26	-0.674782	5.13538e-283
8	PRKAR1B	1.06113	6.51209e-07								2	SYNGR1	-1.23089	2.41932e-65																			4	SULT1A1	-1.13591	3.8327e-245
8	ACTA2	0.93433	1.11949e-05								2	LTB4R	-0.804515	9.43403e-63																			4	CTSW	-0.961747	1.16305e-187
8	SLC39A8	1.00275	8.63338e-05								2	HLA-G	-0.614773	1.16269e-59																			4	SIGLEC12	-1.88772	6.00611e-181
8	TNIP3	1.02567	0.000485136								2	TSPAN32	-0.654548	1.32327e-58																			4	FOLR3	-1.58708	5.66697e-175
8	RNF144B	0.656247	0.00287997								2	KPTN	-0.594102	2.74067e-58																			4	TGM2	-0.813321	1.22825e-149
8	ARID5B	0.978937	0.00344343								2	MVB12B	-0.702513	7.67845e-58																			4	GAPLINC	-1.13553	4.12957e-143
8	MMP2-AS1	0.685122	0.00556695								2	LIN7A	-0.692289	1.32156e-56																			4	ZNF331	-1.53586	1.35035e-141
8	MARVELD1	0.62695	0.0183557								2	ARHGAP22	-0.705811	1.75416e-56																			4	AC013457.1	-1.03337	3.09838e-136
8	FAS	0.674372	0.0230282								2	TDRD3	-0.644197	1.27635e-52																			4	AC019183.1	-1.11019	1.6196e-127
8	AL138963.3	0.908947	0.0263193								2	SLC24A4	-0.615212	1.69439e-52																			4	COLEC12	-0.779431	2.26692e-107
8	ITGAV	0.688376	0.0475812								2	FOLR1	-0.958919	1.85277e-51																			4	ITIH5	-1.00247	1.57284e-105
9	MARCO	0.649605	2.75156e-29								2	SHROOM3	-0.866983	1.17864e-49																			4	FAM3B	-0.685083	6.08532e-104
9	TAGLN2	0.877663	2.2162e-25								2	PEX11A	-0.630312	1.10597e-47																			4	ID3	-1.03414	7.38265e-101
9	HLA-DRB5	0.777659	5.12439e-19								2	STARD10	-0.609456	7.03521e-37																			4	RSPO3	-1.26871	1.0212e-94
9	HLA-DQA1	0.736619	4.14464e-17								2	PATJ	-0.60979	2.84166e-36																			4	APBB2	-1.05423	4.17787e-93
9	ANXA1	0.601833	6.42483e-14								2	ZSCAN18	-0.629589	3.95843e-36																			4	IFI44L	-0.762382	4.58987e-85
9	CCL18	1.29235	6.58804e-14								2	MAP1LC3A	-0.596678	6.95174e-36																			4	ITGB8	-0.840522	2.22739e-81
9	NFKBIA	0.970984	1.10613e-12								2	ACSS1	-0.608862	1.32472e-34																			4	TNNT1	-0.987259	3.77273e-76
9	FOS	0.934919	2.50833e-12								2	AC004921.1	-0.649167	2.05241e-33																			4	HLA-DQB2	-0.683566	1.49027e-75
9	LYZ	0.596817	1.21911e-10								2	FADS1	-0.663351	7.50128e-32																			4	ADGRE3	-1.10969	1.14861e-74
9	CXCL3	0.922288	1.30629e-10								2	CSMD1	-0.772988	6.06162e-28																			4	ITSN1	-0.959393	4.27427e-72
9	CXCL2	1.54076	1.39587e-09								20	LY6E	-0.778384	1.60467e-34																			4	SLC47A1	-0.605872	3.16058e-67
9	PLD3	0.620391	2.63312e-08								20	ISG15	-1.26575	1.33205e-20																			4	NPEPPS	-0.659943	1.1948e-65
9	APOE	0.672466	8.61771e-08								20	FOLR3	-1.32695	3.75105e-19																			4	HLA-DQA2	-0.76255	8.34638e-59
9	PPT1	0.701862	7.1141e-07								20	IFI6	-0.753202	3.61859e-16																			4	IGFBP2	-0.671182	3.66908e-58
9	ZFP36	0.850788	1.22779e-06								20	AC013457.1	-4.00738	8.80288e-16																			4	SYNGR1	-0.820003	5.02508e-54
9	PPP1R15A	0.778804	3.13161e-06								20	MX1	-0.848387	4.08803e-13																			4	TSPAN32	-0.638153	1.3451e-51
9	SCD	0.674934	7.90211e-05								20	IFITM3	-0.72257	2.05843e-12																			4	SAMSN1	-0.93876	2.75028e-47
9	DUSP1	0.778389	8.17617e-05								20	TCEA3	-1.42664	3.80292e-12																			4	OVCH1	-0.685744	9.5555e-47
9	SLC16A10	1.18511	0.000604092								20	IFIT1	-0.998945	1.50596e-11																			4	MAP4K4	-0.671981	1.15839e-45
9	HIST1H1E	1.51779	0.00113333								20	LSAMP	-0.774054	1.94342e-11																			4	SOCS3	-0.941878	1.96668e-45
9	ZFP36L1	1.01693	0.00943893								20	SMIM25	-0.617375	8.41529e-11																			4	ICOS	-0.917607	1.66518e-40
9	JUNB	0.686658	0.02851								20	RPS26	-0.70325	1.39808e-10																			4	C11orf21	-0.68495	1.59609e-39
9	FPR3	0.909519	0.0305117								20	GAPLINC	-1.26534	2.56155e-10																			4	PRSS21	-0.600753	1.42174e-35
9	PMP22	1.18936	0.0360632								20	TNNT1	-1.9806	5.4e-10																			4	WDR49	-0.842836	5.97767e-35
											20	CTSW	-1.29785	7.4354e-10																			4	KCNAB1	-0.756816	1.27054e-32
											20	IFI44L	-1.30232	1.7067e-09																			4	SYTL3	-0.803213	3.21187e-32
											20	IFI35	-0.758889	2.54018e-09																			4	THBS1	-1.05046	3.58198e-31
											20	SIGLEC1	-0.851995	6.84916e-09																			4	PVALB	-0.735579	6.56967e-29
											20	IRF7	-0.719115	9.86474e-09																			4	TDRD3	-0.668541	2.30119e-28
											20	CMPK2	-1.029	1.00766e-08																			4	LINC02328	-0.726068	2.7177e-26
											20	XAF1	-0.789004	1.44161e-08																			4	CRIM1	-0.590593	6.39389e-23
											20	FAM3B	-0.86886	3.05922e-08																			4	ANGPT4	-0.649173	1.62031e-15
											20	FOLR1	-1.51569	6.7194e-08																			4	DTNA	-0.606159	4.06287e-14
											20	VMO1	-0.758463	4.44644e-07																			4	SLC16A10	-0.75991	7.87861e-14
											20	CEACAM21	-0.729629	1.15293e-06																			4	FGL2	-0.769047	9.3191e-10
											20	AC020656.1	-0.879329	1.74753e-06																			4	NRP2	-0.779973	0.00243931
											20	BHLHE41	-0.695148	1.89995e-06																			5	ISG15	-0.684206	4.07566e-78
											20	CD5L	-0.890722	1.09752e-05																			5	SULT1A1	-1.01887	5.10182e-68
											20	MGAT3	-1.1517	2.1636e-05																			5	FOLR3	-1.68431	1.85839e-58
											20	ID3	-0.891592	3.82465e-05																			5	NPEPPS	-0.693882	1.34349e-49
											20	IFIT2	-0.639135	6.20265e-05																			5	FAM3B	-1.05296	1.69524e-45
											20	BIN1	-0.857313	0.000124582																			5	ZNF331	-0.783507	3.20466e-22
											20	DEF6	-0.622551	0.000240627																			5	LSAMP	-0.872898	4.67335e-20
											20	OAS2	-0.810822	0.000727999																			5	ACKR3	-0.889287	1.36671e-17
											20	SULT1A1	-0.96228	0.000736777																			5	NFE2L3	-0.663983	5.05358e-17
											20	MX2	-0.709365	0.000772607																			5	INHBA	-0.64804	2.43437e-15
											20	DCSTAMP	-1.31849	0.00130463																			5	HSPA1B	-0.616066	2.90881e-09
											20	TRIQK	-0.673661	0.00137045																			5	AC092691.1	-0.727212	9.30409e-09
											20	C8B	-0.639961	0.00180426																			5	CES1	-0.636058	4.5456e-08
											20	RNF166	-0.647224	0.00183173																			5	LAIR1	-0.598814	6.59659e-08
											20	LINC02345	-0.656189	0.00316339																			5	AC007952.4	-1.00511	0.000782408
											20	COL9A2	-0.988601	0.0032973																			6	RBP4	-1.05561	7.24867e-75
											20	SSPN	-0.938612	0.00366764																			6	LSAMP	-0.609444	1.17257e-32
											20	KANSL1-AS1	-0.923584	0.00471654																			6	RPS29	-0.702263	2.22732e-26
											20	RBP4	-0.856838	0.00571017																			6	COLEC12	-1.01943	2.49799e-26
											20	LINC00970	-0.631021	0.00608917																			6	CD163	-0.70526	2.31817e-23
											20	FCGR1B	-0.649999	0.00871631																			6	MT-ND3	-0.62555	2.24044e-22
											20	NEIL2	-0.874489	0.0100133																			6	IGFBP2	-0.734841	4.89596e-21
											20	ECSCR	-0.760368	0.0198032																			6	HLA-DQB2	-0.968098	3.73527e-18
											20	HERC5	-0.760747	0.0230198																			6	NDUFB1	-0.668665	8.38597e-16
											20	HSD17B14	-0.595501	0.0241156																			6	ISG15	-0.651139	6.3417e-15
											20	MUS81	-0.851891	0.0295921																			6	FLOT1	-0.679598	2.94876e-11
											20	ZNF365	-0.718248	0.0297265																			6	AC092691.1	-0.610824	3.3041e-11
											20	HLA-DQB2	-0.602817	0.0375068																			8	SULT1A1	-1.06227	2.40171e-40
											20	PDGFD	-0.620074	0.0418971																			8	AC013457.1	-1.52983	1.51345e-29
											20	C1orf54	-1.09092	0.0428538																			8	FOLR3	-2.11765	7.11833e-25
											3	AC013457.1	-3.1313	3.38741e-273																			8	HLA-DQB2	-0.776307	7.31421e-22
											3	RPS26	-0.712793	2.68502e-236																			8	GPX3	-0.7065	3.61538e-20
											3	GAPLINC	-1.04409	1.95832e-203																			8	IFI44L	-0.602541	1.09266e-18
											3	RBP4	-0.966713	8.21059e-147																			8	GAPLINC	-0.902738	1.86923e-18
											3	NQO2	-0.682959	2.0658e-144																			8	TGM2	-0.687727	6.50437e-17
											3	FOLR3	-1.17868	2.07186e-135																			8	HLA-DQA2	-0.607625	1.2228e-14
											3	TCEA3	-0.892819	3.84071e-133																			8	NPEPPS	-0.725952	8.99268e-13
											3	CTSW	-1.07322	1.39387e-129																			8	AC019183.1	-0.845041	3.14725e-12
											3	ITIH5	-0.859353	1.41338e-114																			8	ZNF331	-1.41624	4.44156e-12
											3	TPD52L1	-1.44303	1.6818e-113																			8	CA2	-0.859261	5.87079e-12
											3	FAM3B	-0.755077	3.80873e-113																			8	A2M	-0.862736	2.37349e-11
											3	KCNAB1	-0.732691	5.41392e-101																			8	APBB2	-1.09866	3.945e-11
											3	CEACAM21	-0.71433	1.80865e-100																			8	FGL2	-0.985439	7.17539e-11
											3	SCARB1	-0.821315	1.06357e-98																			8	CRIM1	-0.859321	3.29272e-10
											3	RBP7	-0.809963	2.46348e-93																			8	ID3	-1.05413	3.36386e-10
											3	TDRD3	-1.1808	6.55638e-83																			8	TDRD3	-1.09838	1.34785e-09
											3	C8B	-0.687321	9.69329e-81																			8	SEPT4	-0.681994	1.91715e-09
											3	SSPN	-0.876417	2.26672e-75																			8	GBP5	-0.797225	2.78174e-09
											3	SULT1A1	-0.75199	3.34716e-68																			8	CTSW	-0.598557	1.47124e-07
											3	EGFL7	-1.01809	5.20039e-63																			8	LINC02328	-0.801249	1.05338e-06
											3	LINC01857	-0.913674	1.41191e-49																			8	SSPN	-0.610099	2.29668e-06
											3	NPEPPS	-0.685812	5.28411e-45																			8	KCNAB1	-0.794257	3.01336e-06
											3	LIN7A	-0.809893	1.14067e-43																			8	RSPO3	-0.81803	4.72131e-06
											3	ANGPT4	-0.679004	2.25369e-43																			8	IL18BP	-0.72743	5.10456e-06
											3	ZNF365	-0.777741	4.52882e-41																			8	ARHGAP22	-0.737972	1.47918e-05
											3	IER3	-1.46268	2.38741e-36																			8	MVB12B	-0.666311	1.77773e-05
											3	PEX11A	-0.862458	5.48303e-34																			8	GOLM1	-1.0156	0.00020372
											3	AL161740.1	-0.645993	1.80299e-32																			8	ETV7	-0.682092	0.000385981
											3	TSPAN32	-0.657547	5.81276e-31																			8	HTRA4	-0.741679	0.000450834
											3	DBP	-0.611422	9.87506e-31																			8	SCARB1	-0.645167	0.000698063
											3	SNAI3	-0.62278	4.24435e-30																			8	WDR49	-0.635232	0.00189491
											3	COL9A2	-0.764077	1.33475e-28																			8	SOCS3	-0.593829	0.00370845
											3	NRP2	-0.618312	4.09899e-25																			8	ABCA1	-0.791025	0.00870428
											3	ZNF358	-0.620378	1.39807e-22																			8	AC068992.1	-0.600993	0.0259057
											3	LAIR1	-1.01409	2.71114e-21																			9	AC013457.1	-2.05755	6.61488e-16
											3	LTB4R	-0.65266	4.43911e-20																			9	IFI44L	-0.930858	1.89291e-07
											3	FOLR1	-0.750574	1.20287e-19																			9	BHLHE41	-0.721121	1.2989e-06
											3	SOCS1	-0.624586	1.76901e-08																			9	NQO2	-0.82039	1.48389e-06
											3	IGFBP2	-0.614732	0.000881582																			9	ZNF331	-1.12186	5.49708e-06
											4	AC013457.1	-2.54571	4.7662e-280																			9	AC107884.1	-1.17569	6.77822e-06
											4	RPS26	-0.786454	5.98787e-243																			9	COLEC12	-0.87165	8.91191e-06
											4	CTSW	-1.25125	1.7631e-227																			9	APBB2	-0.960641	2.02705e-05
											4	LSAMP	-0.780923	2.00205e-204																			9	ITIH5	-1.0537	3.3273e-05
											4	MT-ND2	-0.652945	1.67849e-160																			9	EPSTI1	-0.605851	4.74068e-05
											4	BHLHE41	-0.69696	9.97465e-143																			9	CARMIL1	-0.922538	8.58722e-05
											4	GAPLINC	-1.13083	1.80923e-140																			9	GAPLINC	-1.11856	0.000678896
											4	NPEPPS	-0.957626	7.4655e-126																			9	SLC47A1	-0.628951	0.00314616
											4	FOLR3	-1.03197	2.97377e-117																			9	TDRD3	-0.955861	0.00407599
											4	SIGLEC1	-0.739959	4.34356e-117																			9	NHSL1	-0.722645	0.00898974
											4	ISG15	-0.634342	1.19855e-115																			9	WDR49	-0.671959	0.0109248
											4	GLDN	-0.607063	2.52507e-114																			9	HERC5	-0.685754	0.0142232
											4	AL390036.1	-0.629694	1.91118e-104																			9	IPCEF1	-1.14491	0.0150347
											4	NQO2	-0.700273	1.08781e-97																			9	GMDS-DT	-0.684579	0.0158564
											4	NRP2	-1.10417	2.2098e-97																			9	TNFRSF1B	-0.73136	0.0182132
											4	ITIH5	-0.732894	6.65535e-94																			9	CRIM1	-0.866596	0.0235829
											4	PTGER3	-1.82738	4.83428e-91																			9	KCNAB1	-0.611341	0.0342222
											4	IFI44L	-0.978348	6.17027e-86																			9	MAP4K4	-0.614014	0.039756
											4	TDRD3	-1.3003	1.94641e-81																			9	ADGRE3	-0.831279	0.0488067
											4	TSTD1	-0.679272	2.52571e-77
											4	TNNT1	-1.26818	3.52645e-77
											4	RBP4	-0.92848	8.5018e-77
											4	AC022509.2	-1.23416	3.31758e-74
											4	FAM3B	-0.671243	1.63941e-69
											4	SLC19A3	-0.695939	6.35773e-69
											4	SSPN	-1.11389	3.35988e-66
											4	TMEM18	-0.596221	2.18589e-65
											4	VMO1	-0.646262	2.55407e-64
											4	AC008637.1	-1.67871	7.21609e-61
											4	HERC5	-0.634506	2.44782e-60
											4	C11orf21	-0.998612	4.74841e-59
											4	IFIT1	-0.660903	4.67162e-53
											4	FADS1	-0.610091	2.44086e-52
											4	SNAI3	-0.811345	5.7509e-52
											4	ZNF365	-0.748875	2.93214e-49
											4	AC020656.1	-0.737371	4.05573e-48
											4	RSPO3	-0.815311	1.4541e-46
											4	TMEM91	-0.630118	6.04577e-46
											4	KANSL1-AS1	-0.694391	8.62183e-41
											4	SULT1A1	-0.628639	1.56305e-40
											4	NR1D2	-0.778748	2.63589e-39
											4	FADS2	-1.00712	2.81521e-38
											4	CHRM3	-0.603589	1.16818e-37
											4	TSPAN32	-0.64812	3.46334e-35
											4	CRIM1	-0.600599	1.44967e-33
											4	SEPT4	-0.831677	3.6395e-33
											4	APBB2	-0.789496	1.95791e-32
											4	DBP	-0.653129	1.68538e-31
											4	TMEM74B	-0.609514	1.65663e-29
											4	PVALB	-0.957457	2.03924e-29
											4	SYNGR1	-1.10536	3.75731e-29
											4	SCARB1	-0.877488	1.76215e-28
											4	ICOS	-0.710672	1.29802e-27
											4	NFE2	-0.629394	1.6095e-27
											4	TMEM97	-0.91518	3.81157e-27
											4	FOLR1	-0.800117	2.8329e-26
											4	KPTN	-0.623976	2.50719e-25
											4	ANGPT4	-0.718979	7.02857e-24
											4	TCEA3	-0.65717	1.88818e-23
											4	LINC01506	-0.855384	1.51155e-20
											4	ZCCHC24	-0.758299	1.51464e-20
											4	SLC24A4	-0.760009	7.63168e-20
											4	SYTL1	-0.616112	1.3957e-19
											4	PER3	-0.78143	4.08876e-19
											4	SYTL3	-0.744767	9.89232e-19
											4	FGL2	-0.740326	2.04886e-17
											4	MVB12B	-0.680869	2.41382e-17
											4	AC004921.1	-0.613089	3.76382e-14
											4	POMC	-0.621835	1.25418e-12
											4	LAIR1	-0.981042	0.0195168
											5	IFI6	-0.825482	1.15396e-275
											5	LY6E	-0.777038	1.11316e-268
											5	ISG15	-0.903723	4.83783e-224
											5	LGALS3BP	-0.761022	8.13953e-183
											5	SIGLEC1	-0.811907	7.05447e-172
											5	HLA-DQA2	-0.909468	1.78239e-171
											5	FOLR3	-1.63863	7.73631e-156
											5	MX1	-0.624684	1.15848e-147
											5	IFIT1	-0.973754	1.72073e-126
											5	NQO2	-0.713708	1.18021e-121
											5	SULT1A1	-1.15889	1.29143e-116
											5	IFIT3	-0.670115	7.96442e-113
											5	IFI44L	-1.00762	3.63315e-107
											5	FFAR4	-0.630894	1.08815e-93
											5	CORO2A	-0.753629	1.67609e-83
											5	PHLDA3	-0.694409	3.92994e-82
											5	VMO1	-1.14487	5.07454e-81
											5	GAPLINC	-1.39714	1.1349e-68
											5	LSAMP	-1.21918	8.56384e-67
											5	CTSW	-0.925431	1.58863e-57
											5	ECHDC2	-0.730313	1.32262e-56
											5	UNC5B	-0.682952	1.92686e-55
											5	INHBA	-0.844861	4.33949e-55
											5	CES1	-0.795685	1.35701e-54
											5	S100A13	-0.605734	1.39491e-45
											5	SNAI3	-0.664171	8.91877e-45
											5	AC020656.1	-0.606266	1.60545e-41
											5	HCAR2	-0.710841	7.79643e-41
											5	TMEM91	-0.813908	8.66117e-40
											5	CMPK2	-0.64012	6.26911e-38
											5	CSMD1	-0.832144	5.96018e-32
											5	DEFB1	-0.774718	2.89082e-31
											5	PLAC8	-0.694485	9.47072e-26
											5	SAMD4A	-0.596561	1.39186e-23
											5	RBP7	-0.614996	2.02343e-18
											5	IFI27	-0.6383	1.19471e-15
											5	PCOLCE2	-0.59858	8.85213e-15
											5	FOLR2	-0.935003	1.94126e-14
											5	CA2	-0.597217	6.0405e-06
											6	RPS26	-0.903652	7.772e-240
											6	ATP5F1E	-0.613729	9.86629e-117
											6	IGFBP2	-1.58806	2.23051e-99
											6	PPDPF	-0.597412	9.30165e-81
											6	RBP4	-1.19125	5.07376e-75
											6	SMIM25	-0.721222	2.549e-67
											6	ISG15	-1.05834	9.86929e-57
											6	IFI27	-1.34504	1.29284e-50
											6	MT-ND2	-0.688444	2.84744e-42
											6	S100A13	-0.712628	8.73779e-28
											6	COX17	-0.663155	6.2172e-24
											6	C4orf48	-0.595716	3.49151e-22
											6	CCDC85B	-0.6071	5.09291e-18
											6	MRPL41	-0.60682	1.87597e-15
											6	HP	-0.866534	1.37862e-14
											6	PTPMT1	-0.661597	1.47048e-14
											6	MX1	-0.593698	1.70773e-12
											8	AC013457.1	-3.83965	4.94706e-66
											8	GAPLINC	-1.43898	2.7366e-47
											8	NQO2	-0.792044	1.65734e-46
											8	TCEA3	-1.08118	1.28271e-35
											8	TGM2	-0.596424	9.40482e-33
											8	FOLR3	-1.23239	1.1681e-31
											8	SEPT4	-0.961959	3.01654e-30
											8	IFI44L	-0.828157	1.05567e-27
											8	TSTD1	-0.727223	8.59122e-27
											8	ISG15	-0.599604	2.58541e-25
											8	CA2	-0.993856	7.33285e-25
											8	KCNAB1	-1.04837	2.04743e-24
											8	SPARC	-0.626621	1.35107e-23
											8	SCARB1	-0.727005	1.06698e-21
											8	DCSTAMP	-0.825603	1.98103e-21
											8	IFIT1	-0.74364	6.90606e-20
											8	TMEM220	-0.590145	9.19602e-20
											8	LINC01857	-1.44768	1.35663e-19
											8	SSPN	-0.920875	2.20157e-19
											8	ITIH5	-0.691955	4.9299e-19
											8	HLA-DQA2	-0.63314	7.3001e-18
											8	ZNF365	-1.02101	3.0658e-17
											8	MDK	-0.706141	3.87185e-17
											8	AC020656.1	-0.591287	2.86922e-16
											8	RBP7	-0.745376	7.12988e-16
											8	HLA-G	-0.887035	3.69975e-14
											8	MVB12B	-0.631756	2.52877e-13
											8	PKD2L1	-0.835465	7.43787e-13
											8	ISG20	-0.957992	8.83993e-12
											8	SULT1A1	-0.63663	2.15124e-11
											8	MPV17L2	-0.640594	2.15391e-11
											8	RBP4	-0.815062	1.5528e-10
											8	SNAI3	-0.806579	3.05274e-10
											8	ICOS	-0.975705	4.78573e-10
											8	HLA-DQB2	-0.644508	6.48468e-10
											8	PNPLA3	-0.757668	1.89588e-09
											8	TDRD3	-0.658282	2.30226e-09
											8	CAMP	-0.626175	5.39058e-09
											8	RSPO3	-0.888379	9.0693e-09
											8	WWTR1	-0.797551	1.27756e-08
											8	C11orf21	-0.932411	3.11065e-08
											8	SYNGR1	-0.819143	5.33802e-08
											8	IER3	-0.784771	3.9847e-07
											8	EGFL7	-0.732138	4.13451e-06
											8	LRRCC1	-0.690029	1.07609e-05
											8	ACACB	-0.862224	1.22508e-05
											8	NEXN	-0.723283	1.45999e-05
											8	CSNK1E	-0.612695	1.48504e-05
											8	CENPV	-0.599793	2.09533e-05
											8	ACCS	-0.707922	0.000502757
											8	FADS1	-0.755983	0.0010052
											8	COQ7	-0.627917	0.00476836
											9	LSAMP	-0.872067	3.70614e-27
											9	MT-ND2	-0.629966	7.05454e-24
											9	AC013457.1	-2.97385	6.20324e-20
											9	SIGLEC1	-0.949326	1.78478e-15
											9	TCF7L2	-0.599998	5.67715e-15
											9	IPCEF1	-1.70851	2.1641e-12
											9	AL390036.1	-0.776903	8.595e-12
											9	LYST	-0.624461	9.72833e-11
											9	NRP2	-1.16621	6.63893e-10
											9	XAF1	-0.726205	3.72964e-09
											9	AC022509.2	-1.63784	2.16321e-08
											9	FRY	-0.645665	2.71206e-08
											9	CTSW	-0.900244	3.74717e-08
											9	SSPN	-1.85963	4.13811e-08
											9	SH3PXD2A	-1.12439	1.43139e-07
											9	ARHGEF28	-0.688416	4.60378e-07
											9	AC020656.1	-1.54979	5.02209e-07
											9	PNPLA3	-1.23058	5.59651e-07
											9	ALPK1	-0.622545	5.97285e-07
											9	TDRD3	-0.92843	7.04442e-07
											9	EPSTI1	-0.734031	7.90444e-07
											9	KCNAB1	-1.02963	1.06769e-06
											9	SLC19A3	-0.758355	2.04738e-06
											9	ISG15	-0.859231	2.71241e-06
											9	TMEM273	-0.710321	4.82615e-06
											9	IFI44L	-1.17499	6.7025e-06
											9	AC092691.1	-0.605683	1.53221e-05
											9	DGLUCY	-0.643163	2.48753e-05
											9	SP110	-0.619089	3.94497e-05
											9	BHLHE41	-0.628503	4.5218e-05
											9	GAPLINC	-1.3399	4.5362e-05
											9	AC007388.1	-0.600528	5.01847e-05
											9	FOLR3	-0.99031	5.11935e-05
											9	SLC47A1	-0.753371	5.33306e-05
											9	RGS12	-0.738966	0.000113933
											9	MGAT3	-0.724119	0.000166353
											9	CPED1	-0.628113	0.000174664
											9	PLAGL1	-0.823404	0.000318867
											9	MAP3K5	-0.591435	0.000488667
											9	APBB2	-0.673884	0.000682669
											9	DHX29	-0.711087	0.0013406
											9	PRMT7	-1.36995	0.00230696
											9	DPH6	-0.823805	0.00284883
											9	ADCY9	-0.961044	0.00358872
											9	TLCD2	-1.07909	0.00379487
											9	SIRPB2	-0.753547	0.00383918
											9	ECHDC2	-0.669095	0.00437645
											9	DEF6	-0.59991	0.00468975
											9	LIN7A	-1.06777	0.00752781
											9	RAB20	-0.796445	0.00814985
											9	HERC5	-0.642839	0.00960442
											9	NUP160	-0.726518	0.0114138
											9	ATXN7L1	-0.692443	0.0128729
											9	ZCCHC24	-1.03776	0.0145674
											9	RPS26	-0.68881	0.0159064
											9	TENM4	-1.4132	0.0163833
											9	CD5L	-0.612405	0.0167002
											9	SAMD4A	-0.600827	0.017595
											9	MYB	-0.830907	0.0208678
											9	SLC25A45	-0.69599	0.0213083
											9	MSI2	-1.11861	0.0236221
											9	NBPF11	-0.91796	0.0244047
											9	ADGRE1	-0.781851	0.0328007
											9	ZNF365	-0.861775	0.0363432
											9	MFSD14C	-0.600522	0.0415319
											9	ADCY3	-0.676335	0.0418607
											9	LINC00996	-0.683989	0.0445411
											9	TSEN2	-0.646374	0.0492115
											9	NR1D2	-0.77005	0.0496705

## Sheet: 6. CD4+ BAL cells DEG DEP 
Acute																						Recovery
	Gene: Up in Unvaxed				Protein: Up in Unvaxed						Gene:Up in Vaxed					Protein:Up in Vaxed							Gene:Up in Unvaxed				Protein:Up in Unvaxed						Gene:Up in Vaxed					Protein:Up in Vaxed
Cluster	Symbol	Avg_Log2FC	p_Val_Adj		Cluster	ID	Symbol	Avg_Log2FC	p_Val_Adj		Cluster	Symbol	Avg_Log2FC	p_Val_Adj		Cluster	iD	Symbol	Avg_Log2FC	p_Val_Adj		Cluster	Symbol	Avg_Log2FC	p_Val_Adj		Cluster	iD	Symbol	Avg_Log2FC	p_Val_Adj		Cluster	Symbol	Avg_Log2FC	p_Val_Adj		Cluster	iD	Symbol	Avg_Log2FC	p_Val_Adj
1	MTRNR2L12	0.833721	0		14	ITGAE	Hu.CD103	0.394109	0.0001179		1	ISG15	-1.04619	1.36784e-187		14	CCR6	Hu.CD196	-0.43178	1.59747e-06		1	FOS	0.905177	6.28861e-150		1	CD27	Hu.CD27	0.468547	1.16725e-09		1	CCL5	-0.65397	1.23594e-77		1	CD27	Hu.CD27	0.468547	1.16725e-09
1	AL138963.3	1.07898	0		27	IL2RB	Hu.CD122	0.323371	0.00433566		1	CISH	-0.833893	1.61141e-141		7	CLEC4C	Hu.CD303	-0.330519	3.04208e-66		1	DUSP1	0.722158	2.88488e-101								1	HLA-DRB5	-0.710114	3.87558e-62		1	ITGAE	Hu.CD103	-0.402297	6.82116e-14
1	SIRPG	1.24626	1.8094e-181		14	CD14	Hu.CD14-M5E2	0.324123	0.000458761		1	TMEM173	-0.812144	5.57006e-139		14	FCGR2A	Hu.CD32	-0.343112	0.0021481		1	JUN	0.676626	2.59633e-98								1	NPEPPS	-1.00941	5.73496e-54		17	ITGAL	Hu.CD11a	-0.475658	7.07344e-09
1	FKBP5	0.746693	1.14725e-151		14	CCR5	Hu.CD195	0.545729	1.34231e-76		1	LMNA	-0.831338	1.55841e-78		7	PTPRC	Hu.CD45RA	-0.754375	2.87669e-157		1	NFKBIA	0.832409	6.57887e-80								1	HOPX	-0.693529	2.34997e-47		1	ITGAL	Hu.CD11a	-0.485452	3.47241e-104
1	BLOC1S1	0.677713	5.65053e-121		1	CCR5	Hu.CD195	0.366699	0		1	IFITM3	-0.606565	7.27358e-76		14	ITGA4	Hu.CD49d	-0.35183	3.37741e-24		1	RASAL2	1.58852	9.35119e-72								1	ATP2B1	-0.674033	1.25778e-44		14	ITGAL	Hu.CD11a	-0.636923	8.95651e-11
1	CKLF	0.653358	8.77816e-120		27	CCR5	Hu.CD195	0.334892	1.1147e-07		1	SNHG12	-0.698683	2.09264e-63		1	ITGA4	Hu.CD49d	-0.343133	0		1	PPP1R15A	0.787451	1.87195e-61								1	SEPT11	-0.786621	5.43425e-42		1	ITGB2	Hu.CD18	-0.581978	1.57542e-95
1	NDUFA11	0.61663	1.33868e-110		7	CCR5	Hu.CD195	0.514309	0		1	LDLR	-0.630538	3.38775e-60		27	ITGA4	Hu.CD49d	-0.357137	1.5933e-05		1	FOSB	0.816823	5.11371e-50								1	C15orf53	-0.880788	8.40421e-42		17	ITGB2	Hu.CD18	-0.487442	0.000848501
1	AOAH	0.925269	5.59038e-109		14	CD1C	Hu.CD1c	0.325872	0.0371607		1	LINC01943	-0.666169	1.82243e-56		7	SELL	Hu.CD62L	-0.328802	0.000250354		1	KLF2	0.767481	1.13049e-48								1	GBP5	-0.604697	1.74166e-28		14	ITGB2	Hu.CD18	-0.530284	0.000353333
1	CBLB	0.618696	2.00851e-107		14	LAG3	Hu.CD223	0.502743	2.52823e-46		1	MX1	-0.692188	5.33226e-51		1	SELL	Hu.CD62L	-0.646707	2.54494e-62		1	AL138963.3	0.9372	8.78105e-36								1	LUC7L3	-0.619283	1.61896e-26		14	CCR6	Hu.CD196	-0.481529	0.0358221
1	PTPN22	0.682328	2.90553e-107		1	LAG3	Hu.CD223	0.429185	0		1	DPP4	-0.666512	4.52113e-45		14	SELL	Hu.CD62L	-0.662583	0.000890736		1	ZFP36	0.603191	2.18498e-30								1	SLF1	-0.673011	5.85837e-24		1	CD2	Hu.CD2	-0.342336	1.45495e-198
1	FAM89B	0.60728	8.66185e-95		27	LAG3	Hu.CD223	0.397379	1.88977e-07		1	DDIT3	-0.834218	3.48849e-39		27	FAS	Hu.CD95	-0.333652	1.33559e-09		14	FOS	1.62595	8.03567e-18								1	TRERF1	-0.657881	2.20826e-20		14	CD244	Hu.CD244	-0.4579	8.91561e-07
1	LYST	0.721368	6.25119e-86		7	LAG3	Hu.CD223	0.423692	7.09966e-195		1	SLC1A5	-0.692622	8.84576e-37								14	JUN	1.37577	1.53691e-13								1	PPP1R16B	-0.631037	2.52062e-20		14	DPP4	Hu.CD26	-0.378428	1.20629e-06
1	MT2A	0.658609	1.85543e-84		1	SLAMF7	Hu.CD319	0.599309	0		1	RGS16	-0.699131	1.07127e-15								14	CD69	1.14145	1.63578e-13								1	SEL1L3	-0.595396	1.31125e-15		17	CD3D	Hu.CD3-UCHT1	-0.344224	0.000113836
1	SNX9	0.682794	9.34994e-84		27	SLAMF7	Hu.CD319	0.747476	6.21347e-11		14	CISH	-1.38065	1.04157e-16								14	FOSB	1.16644	4.2472e-12								1	LMNA	-0.734063	7.04453e-13		17	ENTPD1	Hu.CD39	-1.02759	5.67814e-19
1	ABCG1	0.806848	2.02109e-78		7	SLAMF7	Hu.CD319	0.60495	2.96174e-231		14	BCL2	-0.817011	9.37394e-16								14	KLF6	0.812138	4.81263e-09								1	LINC00861	-0.68386	1.83076e-12		14	PTPRC	Hu.CD45-HI30	-0.433378	1.19592e-07
1	RGS2	0.956555	6.92198e-77		14	SLAMF7	Hu.CD319	0.717923	8.93414e-55		14	FTL	-1.38981	1.95033e-12								14	DUSP1	1.23148	1.74357e-08								14	ST8SIA1	-1.57605	4.89269e-05		17	PTPRC	Hu.CD45-HI30	-0.38526	1.4599e-09
1	CLSTN3	0.694905	2.22998e-70		7	CD38	Hu.CD38-HIT2	0.34731	8.0546e-92		14	LMNA	-1.1619	2.59441e-12								14	TNFAIP3	1.26021	2.71879e-07								14	ITGAE	-1.4521	0.0354332		1	PTPRC	Hu.CD45-HI30	-0.34708	4.27454e-94
1	CCL4	1.06764	2.38011e-59		1	ENTPD1	Hu.CD39	0.752429	1.34702e-170		14	S100A10	-0.915548	4.5419e-11								14	BTG1	0.859583	5.76926e-07								17	LMNA	-1.29675	1.183e-07		27	PTPRC	Hu.CD45-HI30	-0.525117	0.00146425
1	DUSP4	0.650435	4.13088e-47		7	ENTPD1	Hu.CD39	0.355564	3.93657e-20		14	TXNIP	-1.12797	5.00519e-11								14	ZFP36	1.25895	3.93579e-06								17	PTPN1	-1.03603	2.33071e-05		1	ITGA1	Hu.CD49a	-0.377419	4.14368e-37
1	CTLA4	0.614395	6.15982e-37		14	ENTPD1	Hu.CD39	0.679514	6.21137e-13		14	EMP3	-0.906092	5.56086e-10								14	NFKBIA	1.60686	5.02115e-06								17	AHNAK	-0.830175	7.45713e-05		17	CD5	Hu.CD5	-0.323568	2.30817e-08
1	HOPX	0.638598	2.28605e-33		14	ITGA2B	Hu.CD41	0.408595	0.00699868		14	KLF2	-1.039	1.15448e-07								14	JUNB	1.36523	1.85749e-05								17	TNFRSF18	-0.76825	0.000136714		1	CD5	Hu.CD5	-0.329536	3.6595e-102
1	IFNG	0.670694	2.41094e-28		14	ITGA1	Hu.CD49a	0.667921	1.65495e-21		14	LDLR	-0.904451	3.27235e-07								14	SARAF	0.801159	2.66723e-05								17	IKZF2	-0.80344	0.000192202		17	ICAM1	Hu.CD54	-0.413211	0.000132886
14	MTRNR2L12	0.840245	1.00108e-50		14	CD8A	Hu.CD8	0.630698	1.50825e-09		14	GNAQ	-0.89457	7.74706e-07								14	ZFP36L2	0.744038	0.000105748								17	TAGLN2	-0.683092	0.000464052		14	ICAM1	Hu.CD54	-0.568869	2.05262e-07
14	AOAH	1.30883	2.34463e-31		14	KLRD1	Hu.CD94	0.404092	4.72724e-11		14	S100A11	-0.979293	8.72226e-06								14	JUND	0.733234	0.00204502								17	NPEPPS	-0.937902	0.000611073		14	B3GAT1	Hu.CD57	-0.393134	0.00359467
14	FUT8	0.905074	3.84649e-24		7	KLRD1	Hu.CD94	0.322708	9.99061e-69		14	TAGLN2	-0.751865	1.66715e-05								14	PPP1R15A	1.66429	0.00209798								17	TRPS1	-1.48714	0.000782931		14	CD69	Hu.CD69	-0.433355	1.34792e-09
14	CBLB	0.870783	4.92157e-24								14	ANTXR2	-0.614501	0.000132538								14	HSP90AB1	0.983353	0.00412149								17	F5	-1.17117	0.00107055		1	CD69	Hu.CD69	-0.365906	2.0353e-113
14	SRGAP3	1.74376	4.30217e-17								14	S100A6	-0.881432	0.000144369								17	RPS25	0.62587	2.74246e-15								17	PARP14	-1.16398	0.00142812		17	CD7	Hu.CD7	-0.820516	1.50205e-09
14	CCL4	1.83834	4.19006e-16								14	MUC20-OT1	-0.619723	0.00789195								17	FOS	0.88522	1.03625e-10								17	HLA-DQB1	-1.14488	0.00168228		17	HLA-A	Hu.HLA.ABC	-0.633229	4.5902e-10
14	PTPN22	0.906687	5.40226e-13								14	TMEM173	-0.916982	0.0138529								17	JUN	0.971815	1.47925e-09								17	WNK1	-0.784571	0.00169835		1	HLA-A	Hu.HLA.ABC	-0.522649	5.49301e-59
14	ITGA1	1.2745	3.36633e-09								14	PTGES3	-0.66392	0.0198187								17	RASAL2	2.12589	1.57609e-09								17	TNFRSF9	-1.12858	0.00231504		14	HLA-A	Hu.HLA.ABC	-0.587565	0.00223323
14	SFMBT2	0.668067	6.48935e-09								14	H1FX	-0.754992	0.0260924								17	DUSP1	0.706787	6.66499e-06								17	EPSTI1	-0.719739	0.00276748		14	CD44	HuMs.CD44	-0.61017	1.34464e-15
14	JARID2	0.670231	2.74012e-07								14	ANP32B	-0.651653	0.027611								17	JUNB	0.767924	0.000709262								17	LAIR2	-1.18905	0.00378829		17	CD44	HuMs.CD44	-0.455399	7.51649e-12
14	SCML4	0.730053	3.10656e-07								14	ARPC5	-0.647348	0.029486								17	CXCR4	0.708546	0.0058046								17	NR3C1	-0.801821	0.0043937		1	CD44	HuMs.CD44	-0.435108	1.12322e-127
14	ATP8A1	0.732302	3.14806e-07								17	ISG15	-0.943464	9.74826e-13								17	IER2	0.76359	0.00799242								17	CBLB	-0.990264	0.00445519		17	ICOS	HuMsRt.CD278	-0.395787	8.19776e-11
14	FKBP5	0.620352	6.88318e-07								17	IFI6	-0.770077	0.000487055								17	PPP1R15A	0.820486	0.0104529								17	HLA-DRB5	-1.06941	0.0046862
14	CCL5	0.646664	9.32834e-07								17	SORL1	-0.601927	0.00680658								17	FOSB	0.854088	0.0342918								17	REV3L	-0.992975	0.00901657
14	LYST	0.681458	1.12687e-06								17	OAS1	-0.681337	0.0370033																			17	PRKAR1A	-0.761127	0.00933433
14	GRAMD1B	0.819294	3.70715e-06								17	IRF7	-0.638549	0.0429947																			17	STAT4	-0.89967	0.0131087
14	GALNT2	1.11593	8.41849e-06								27	ISG15	-0.816509	0.025815																			17	IL12RB1	-1.24156	0.0253471
14	SLC7A5	0.675678	0.00017061																														17	TNFRSF4	-0.827139	0.0269114
14	MIR4435-2HG	0.628991	0.000179022																														17	NUP50	-0.965304	0.0295274
14	CD7	0.921774	0.000380683																														17	NCOA2	-0.910618	0.0325644
14	SNX9	0.746857	0.00179003																														17	BACH1	-0.949604	0.0449163
14	NR4A2	1.00921	0.00643928
17	RASAL2	2.75484	7.83553e-32
17	CST7	0.639542	0.000121251
27	MTRNR2L12	0.712122	2.51321e-09
27	RPL26	0.591593	2.98859e-08
27	AL138963.3	1.08749	0.00600932

## Sheet: 7. B cells in BAL DEG DEP 
Acute																						Recovery
	Gene: Up in Unvaxed				Protein: Up in Unvaxed						Gene:Up in Vaxed					Protein:Up in Vaxed						Gene:Up in Unvaxed					Protein:Up in Unvaxed						Gene:Up in Vaxed					Protein:Up in Vaxed
Cluster	Symbol	Avg_Log2FC	p_Val_Adj		ID	Cluster	Symbol	Avg_Log2FC	p_Val_Adj		Cluster	Symbol	Avg_Log2FC	p_Val_Adj		ID	Cluster	Symbol	Avg_Log2FC	p_Val_Adj		Cluster	Symbol	Avg_Log2FC	p_Val_Adj		ID	Cluster	Symbol	Avg_Log2FC	p_Val_Adj		Cluster	Symbol	Avg_Log2FC	p_Val_Adj		ID	Cluster	Symbol	Avg_Log2FC	p_Val_Adj
22	RASAL2	3.80112	2.15625e-12		GP1BB	22	Hu.CD42b	0.504676	0.0141578		22	LMNA	-1.95571	9.02362e-21		CD44	22	HuMs.CD44	-0.520337	7.49507e-16		22	RASAL2	2.84472	8.72331e-34		CD24	22	Hu.CD24	0.390929	1.78099e-11		22	HLA-DQA2	-3.33741	3.84006e-60		HLA-A	22	Hu.HLA.ABC	-0.835647	4.50058e-20
22	RPS10	1.0167	0.000121915								22	MYADM	-1.52607	1.65641e-13		ITGB2	22	Hu.CD18	-0.408353	0.0104742		22	JCHAIN	2.92088	1.0972e-21		CD27	22	Hu.CD27	0.790528	1.92628e-07		22	HLA-DRB5	-1.14691	5.16675e-28		MS4A1	22	Hu.CD20-2H7	-0.503768	2.06948e-07
22	TSPAN3	0.814675	0.00906607								22	TAGLN2	-0.805759	7.72711e-12								22	DERL3	2.38764	8.87475e-20		CD1C	22	Hu.CD1c	0.655521	2.15029e-05		22	EBI3	-2.581	1.04335e-10		PTPRC	22	Hu.CD45-HI30	-0.36267	4.29868e-07
											22	S100A10	-1.18338	1.22965e-10								22	IGHA2	1.61569	7.43915e-17								22	SNX9	-2.00418	8.911e-09		CD22	22	Hu.CD22	-0.916398	2.62147e-06
											22	ADGRE5	-1.08728	2.88697e-10								22	S100A4	1.2552	6.32418e-16								22	HOPX	-1.92857	5.04429e-08		CD47	22	Hu.CD47	-0.419758	2.73951e-06
											22	AHNAK	-0.906959	2.06467e-09								22	FTL	0.625608	2.08651e-10								22	CD70	-1.6687	8.3508e-06		HLA-DRA	22	Hu.HLA.DR	-0.424668	4.43458e-06
											22	CRIP1	-0.91957	1.60576e-08								22	SMARCB1	1.07703	1.01705e-09								22	PLAC8	-1.70227	4.45789e-05		CD40	22	Hu.CD40	-0.48988	7.47854e-06
											22	CD44	-0.716566	1.04151e-07								22	CHCHD10	0.817455	2.07302e-09								22	MARCH3	-1.64694	0.000113062		NT5E	22	Hu.CD73	-0.500729	0.0156254
											22	ATP2B1	-0.816743	3.51242e-06								22	AC098613.1	1.98249	5.52872e-09								22	NPEPPS	-1.19582	0.000126169
											22	PDE4D	-1.057	2.44366e-05								22	LTB	0.729052	5.68954e-09								22	CRIP2	-1.82658	0.000127155
											22	CRIP2	-1.5658	5.07924e-05								22	FCRL2	1.28419	1.4508e-08								22	ST6GAL1	-0.934523	0.000185525
											22	EMP3	-0.618562	7.92709e-05								22	UBE2J1	0.986939	6.07582e-08								22	EZR	-0.663947	0.00018962
											22	TUBB6	-1.38129	0.000148179								22	CD24	1.17995	7.2287e-08								22	IGHG1	-0.999051	0.000270356
											22	LRRFIP1	-0.623809	0.000233938								22	RHEX	1.126	1.24593e-06								22	LARGE1	-1.73352	0.000576219
											22	IQGAP2	-1.19586	0.00154957								22	CMTM7	0.966993	4.42231e-05								22	BACH2	-1.69235	0.000961717
											22	MTSS1	-0.702477	0.00612497								22	CORO1B	1.02298	0.000879691								22	FNBP1	-0.799038	0.00251326
											22	KLF6	-0.729985	0.00692706								22	RGS1	1.13506	0.00131042								22	PDE4D	-1.35048	0.013991
											22	BBC3	-1.3653	0.00794571								22	RGS2	2.22311	0.0016547								22	ADGRE5	-0.8644	0.0143534
											22	VIM	-0.646109	0.00883452								22	UTS2B	1.81793	0.00224889								22	SKI	-1.49264	0.0187344
											22	TEX9	-1.09178	0.0114275								22	MACROD2	1.37521	0.00262516								22	PARP14	-0.850211	0.0274906
											22	OPTN	-0.830659	0.0183705								22	LY86	0.613001	0.00333541
											22	SLC16A3	-0.725344	0.0279846								22	TNFSF11	1.29843	0.00555917
																						22	SCN3A	1.37412	0.00673692
																						22	PTPRJ	1.31982	0.00825435
																						22	DAAM1	1.28364	0.0120858
																						22	SYNGR1	0.948949	0.0136942
																						22	GPR25	0.720261	0.0246645
																						22	RAB5IF	1.0065	0.0321111
																						22	CTSC	0.702799	0.0336456
																						22	TCEA1	0.600619	0.0386391
																						22	NSA2	0.655394	0.0487532

## Sheet: 8. Plasma cells BAL DEG DEP 
Acute																						Recovery
	Gene: Up in Unvaxed				Protein: Up in Unvaxed						Gene:Up in Vaxed					Protein:Up in Vaxed						No DEG/DEP
Cluster	Symbol	Avg_Log2FC	p_Val_Adj		ID	Cluster	Symbol	Avg_Log2FC	p_Val_Adj		Cluster	Symbol	Avg_Log2FC	p_Val_Adj		ID	Cluster	Symbol	Avg_Log2FC	p_Val_Adj
25	MTRNR2L12	1.32565	1.82832e-28		TNFRSF14	25	Hu.CD270	0.334493	7.54011e-24		25	CMTM7	-1.60949	4.33377e-17		IFNGR1	25	Hu.CD119	-0.84498	9.45882e-24
25	AL138963.3	1.98618	1.41536e-07		C5AR1	25	Hu.CD88	0.406969	2.7906e-10		25	IGLVI-70	-1.50037	2.02122e-11		PTPRC	25	Hu.CD45RA	-0.470222	3.98093e-18
25	PPDPF	0.987022	7.81307e-07		IGHM	25	Hu.IgM	0.602395	5.14373e-10		25	CYTOR	-1.06016	3.76674e-11		SELL	25	Hu.CD62L	-1.33493	1.76301e-12
25	NDUFA11	0.927682	2.68081e-06		B3GAT1	25	Hu.CD57	0.482615	1.71861e-06		25	MARCKS	-1.12345	2.29756e-10		CD27	25	Hu.CD27	-0.6705	4.07308e-09
25	MT-ND5	0.813524	6.05723e-06		CD28	25	Hu.CD28	0.387661	2.56172e-05		25	ISG15	-2.60419	2.9152e-10		CD44	25	HuMs.CD44	-0.342835	0.000336894
25	MT-ND6	1.12607	3.48757e-05		ITGA1	25	Hu.CD49a	0.469557	0.0246652		25	ZNF706	-0.64851	2.0899e-09
25	MT-ATP6	0.610416	0.0001637								25	CD70	-2.09391	4.11435e-08
25	MRPL23	1.20667	0.00651108								25	UBALD2	-0.695795	4.93741e-08
25	CTSH	0.910878	0.0499452								25	MYADM	-0.886785	1.12764e-07
											25	IGLV3-19	-1.89589	4.86186e-07
											25	JAK1	-0.902955	9.61719e-07
											25	CD48	-0.940169	9.66049e-07
											25	A1BG	-0.87156	1.54008e-06
											25	TMEM156	-1.01003	1.86966e-06
											25	AL133467.1	-1.06396	3.03023e-06
											25	NCLN	-0.721765	3.2058e-06
											25	ERAP2	-0.852615	4.01359e-06
											25	UQCRHL	-1.39042	6.54327e-06
											25	STAP1	-2.48874	1.04753e-05
											25	IGHG4	-0.716951	1.05004e-05
											25	AKIRIN2	-0.829119	1.16177e-05
											25	LSM2	-0.679256	1.48811e-05
											25	FCHSD2	-0.965739	1.56381e-05
											25	DNAJC15	-0.659349	2.29875e-05
											25	CD27	-0.668178	2.63428e-05
											25	PLEKHO1	-0.766171	3.34488e-05
											25	SMCHD1	-0.690434	3.62883e-05
											25	FCGR2B	-0.878592	3.6481e-05
											25	CRIP1	-1.05181	3.96667e-05
											25	IFI6	-1.20847	4.03201e-05
											25	PTPN2	-0.663939	4.65633e-05
											25	CCDC88A	-1.03599	7.67163e-05
											25	UBE2G1	-0.654399	0.000137237
											25	MFL2	-0.699813	0.000148691
											25	HEBP2	-0.662794	0.000152862
											25	RB1	-0.74339	0.000203256
											25	TSHZ2	-0.841291	0.000231798
											25	COL9A3	-1.02664	0.000255014
											25	ADD1	-0.66469	0.00028284
											25	NCOA3	-0.75035	0.00033483
											25	DHRS1	-0.838363	0.000394266
											25	PTGES3	-0.596729	0.000395996
											25	CD38	-0.649289	0.000425705
											25	JPT1	-0.617373	0.000447914
											25	CAMKK2	-0.889087	0.000499797
											25	AHNAK	-0.914671	0.000502134
											25	SRPK2	-0.928455	0.000617962
											25	SLC2A5	-1.0863	0.000628348
											25	RNGTT	-0.880709	0.00093442
											25	KLF2	-0.67599	0.000966568
											25	PPP1R21	-1.57245	0.00172734
											25	PDE4D	-1.60275	0.00186263
											25	AL662844.4	-0.92459	0.00201956
											25	PRKAR2A	-0.942757	0.002066
											25	KLHL5	-0.704286	0.00212783
											25	STAU1	-0.628784	0.00266019
											25	SULT1A1	-1.18538	0.00287329
											25	ETV6	-0.75284	0.00300824
											25	SH2B2	-0.878812	0.00333647
											25	E2F5	-0.971773	0.00391634
											25	GALNT10	-0.887971	0.00466693
											25	HLA-DRB5	-1.08911	0.00470116
											25	PRKDC	-1.03006	0.00489707
											25	MTMR9	-0.714998	0.00491906
											25	BCAR3	-1.58402	0.00492697
											25	ITGB1	-0.785075	0.00501561
											25	LYN	-0.829017	0.00564701
											25	SLC12A6	-0.869675	0.00682782
											25	N4BP1	-0.591382	0.00880269
											25	LARGE1	-1.01249	0.00934314
											25	AQR	-1.29141	0.00948109
											25	HIST1H4C	-0.895877	0.00985639
											25	SNX6	-0.715986	0.0100061
											25	LY6E	-0.655139	0.0100563
											25	TRIM47	-1.41351	0.0102083
											25	DDX54	-0.90838	0.0105006
											25	PLCG2	-0.629818	0.0111717
											25	COPS9	-0.591185	0.0112442
											25	EHD4	-0.835914	0.0118858
											25	UBAP2	-1.15651	0.0120956
											25	ELP5	-0.753657	0.0128815
											25	TDG	-0.840311	0.0145051
											25	IGHA2	-1.2557	0.0242531
											25	SP110	-0.797771	0.0243028
											25	LSR	-0.728263	0.025676
											25	BCL2L1	-0.738141	0.0266417
											25	SMARCC1	-0.64043	0.0286856
											25	BCL2L11	-0.783807	0.0290346
											25	FAM126A	-1.05505	0.0309142
											25	PMPCB	-0.737085	0.0320571
											25	NT5C3B	-0.787293	0.0391447
											25	CDKN2A	-0.681024	0.0395512
											25	KRAS	-0.682742	0.0398788
											25	SIPA1L1	-0.750451	0.0402269
											25	OSBPL10	-1.32166	0.0403048
											25	PLXNC1	-0.667028	0.0420732
											25	CTDSP2	-0.987545	0.042812
											25	OGDH	-0.722272	0.0444067
											25	NFX1	-0.75941	0.0448446
											25	EVA1B	-1.46646	0.0459389
											25	CLIP4	-1.02753	0.0477123
											25	TSC22D4	-0.762605	0.0485993
											25	NSD2	-1.41119	0.0491202

## Sheet: 9. Epithelium in BAL DEG DEP 
Acute																		Recovery
Gene: Up in Unvaxed				Protein: Up in Unvaxed					Gene:Up in Vaxed				Protein:Up in Vaxed					Gene:Up in Unvaxed				Protein:Up in Unvaxed					Gene:Up in Vaxed				Protein:Up in Vaxed
Symbol	Avg_Log2FC	p_Val_Adj		ID	Symbol	Avg_Log2FC	p_Val_Adj		Symbol	Avg_Log2FC	p_Val_Adj		ID	Symbol	Avg_Log2FC	p_Val_Adj		Symbol	Avg_Log2FC	p_Val_Adj		ID	Symbol	Avg_Log2FC	p_Val_Adj		Symbol	Avg_Log2FC	p_Val_Adj		Symbol	Avg_Log2FC	p_Val_Adj
COL28A1	1.57546	1.68387e-23		CCR4	CCR4	0.347661	8.64493e-10		AC100781.1	-5.04231	1.66432e-99		CD101	Hu.CD101	-0.46869	1.81658e-33		C2orf40	1.33026	4.34438e-14		FCGR3A	Hu.CD16	0.507185	0.00166561		MT-CO1	-0.79743	6.11841e-22		none
RPL26	0.67401	1.33556e-22		CD2	CD2	0.549906	7.76071e-07		LKAAEAR1	-3.36327	1.88611e-93		IFNGR1	Hu.CD119	-0.540852	8.92409e-59		C9orf24	1.13478	1.02588e-13		LAG3	Hu.CD223	0.351147	0.000469545		TGM2	-2.7275	2.15259e-19
COTL1	1.06301	3.16765e-18		CD3D	CD3D	0.51294	1.23639e-08		SULT1A1	-1.23265	1.24931e-50		ITGAX	Hu.CD11c	-0.890479	4.62218e-07		CKB	1.51632	1.65115e-13		CD3D	Hu.CD3-UCHT1	0.447307	0.0441158		SCGB3A1	-1.37733	5.11051e-17
ACTB	0.701795	8.47453e-18		CD48	CD48	0.877495	7.09444e-30		AL357093.2	-0.972443	6.58304e-42		ANPEP	Hu.CD13	-0.401761	2.40894e-08		C20orf85	1.06031	4.19192e-13		SLAMF7	Hu.CD319	0.496229	0.00207288		LSAMP	-2.39463	1.40375e-15
FP671120.1	1.60863	6.9329e-17		CD5	CD5	0.451461	1.56688e-07		TACC2	-0.938965	5.56519e-39		CD22	Hu.CD22	-0.391124	2.76929e-05		WDR38	1.38016	1.973e-12		SELP	Hu.CD62P	0.48499	0.0107484		MT-ATP8	-0.873393	6.10297e-15
IL32	1.19693	2.78383e-16							SULT2B1	-1.67248	3.13478e-38		ITGB1	Hu.CD29	-0.473586	1.20666e-60		TPPP3	0.976043	2.47262e-12							SCGB1A1	-0.824022	8.99792e-15
CCL5	1.45237	4.7262e-13							EIF4EBP3	-1.08209	8.06871e-38		PECAM1	Hu.CD31	-0.823421	6.38032e-14		GSTA2	1.88779	3.88848e-12							AC013457.1	-8.23282	2.71538e-14
CORO1A	1.52061	2.89185e-11							LMTK3	-1.93896	7.96022e-36		FCGR2A	Hu.CD32	-0.441075	0.00479953		METRN	1.484	4.70727e-12							MT-ND4L	-0.739116	3.71673e-14
CYP2B6	1.85427	7.1288e-09							AL445584.2	-1.7307	1.38291e-35		SIGLEC7	Hu.CD328	-0.955465	2.03389e-10		RSPH1	1.02853	1.4924e-11							TFRC	-2.13718	1.90435e-13
PTPRC	1.27633	1.31827e-08							FABP6	-0.999245	6.68051e-33		CD33	Hu.CD33	-0.558218	0.0352115		C9orf116	1.16098	1.86924e-11							MTRNR2L12	-0.745094	7.99319e-13
CD44	1.0272	7.11318e-08							NUPR1	-0.705592	8.17186e-32		CD38	Hu.CD38-HIT2	-0.742966	1.67377e-97		IGFBP7	1.02137	1.98557e-11							THBS1	-2.80574	7.22024e-12
AL138963.3	1.49762	2.757e-07							ABHD2	-0.757291	1.18232e-31		CD40	Hu.CD40	-0.33398	5.45649e-07		ID2	1.69972	2.92301e-11							ZNF331	-3.2031	1.50794e-11
CD52	0.87329	3.0988e-07							S100A13	-0.65935	4.9171e-31		CD47	Hu.CD47	-0.564433	2.33177e-49		DSTN	0.896741	3.1212e-11							HLA-A	-0.755235	8.15235e-11
SRGN	1.06075	1.43313e-06							CBR1	-0.806982	8.67528e-31		ITGA2	Hu.CD49b	-0.619198	6.77135e-51		DYNLRB2	1.13848	4.105e-11							IGF1	-3.48941	1.37987e-10
RAC2	1.16768	1.73705e-06							CARS	-1.00256	9.41222e-31		TFRC	Hu.CD71	-0.512329	6.01447e-14		CNTD1	2.24962	5.23638e-11							RPS26	-0.647671	2.59701e-10
FXYD5	0.612922	1.8468e-06							CLDN3	-0.913699	5.74272e-29		NT5E	Hu.CD73	-0.642192	1.84182e-21		CAPS	0.890494	5.27946e-11							SCD	-1.66087	2.70756e-10
LMCD1-AS1	1.06837	1.23344e-05							BEST4	-1.21682	1.38669e-28		CD81	Hu.CD81	-0.347009	4.49584e-22		C11orf88	1.09288	6.06548e-11							MT-ND5	-0.649012	4.09713e-10
HLA-DQB1	0.650149	2.31779e-05							UBE2H	-0.696358	6.66238e-28		CD86	Hu.CD86	-0.661142	7.94017e-06		FAM183A	1.06403	7.94276e-11							COLEC12	-2.70084	5.65239e-10
LAPTM5	1.15064	3.16855e-05							MGLL	-0.599402	3.5773e-27		FAS	Hu.CD95	-0.431665	8.72096e-64		PRDX5	0.973447	2.00708e-10							MT-ND6	-1.08797	3.53478e-09
TIMP4	1.4647	7.0459e-05							LMO2	-0.779493	5.80552e-27		HLA-A	Hu.HLA.ABC	-0.524662	7.88365e-16		TUBB4B	0.966017	2.8323e-10							AC019183.1	-2.93362	3.98621e-09
ARHGDIB	0.86073	0.000149584							MTSS1	-0.837406	7.43001e-27		HLA-DRA	Hu.HLA.DR	-0.485837	4.02919e-36		SMIM22	1.05847	2.87573e-10							HLA-B	-0.672523	8.88164e-09
GOLGA8A	1.33674	0.00231114							WIPI1	-0.969033	7.51254e-27		ITGA6	HuMs.CD49f	-0.430259	2.06748e-34		CTNNAL1	1.30012	3.32382e-10							KMO	-2.60529	1.26152e-08
PSPH	0.940715	0.0360643							SLC29A1	-1.11784	1.01772e-26							C5orf49	1.1518	4.97138e-10							BPIFB1	-2.344	2.1611e-08
									FXYD1	-1.00273	2.63976e-26							CRIP1	0.854911	5.38128e-10							HLA-C	-0.591993	4.32652e-08
									SEC14L3	-1.46915	3.25782e-26							C1orf194	1.07088	1.08416e-09							HLA-DQB1	-1.16478	5.02698e-08
									TSHZ2	-0.798107	3.84982e-26							ANKRD37	1.28532	1.13414e-09							DOCK10	-2.23098	5.54691e-08
									IFITM10	-2.03446	5.28455e-26							C12orf75	1.07637	1.15861e-09							CTSC	-0.982599	1.57387e-07
									PPM1H	-0.806208	2.38636e-25							DNALI1	1.02477	1.33897e-09							MSR1	-1.4217	1.84946e-07
									SH3BP5	-0.749477	1.32111e-24							MRPS31	1.08772	1.49031e-09							KCNAB1	-4.14441	5.33878e-07
									EYA2	-0.753447	3.37279e-24							PIFO	0.895994	1.59618e-09							BEST1	-1.6662	9.62147e-07
									RXRA	-0.605139	7.97455e-24							GSTA1	0.974471	2.01229e-09							FCGR2A	-1.60775	1.39045e-06
									CCDC80	-1.02232	2.03917e-23							CCDC78	0.999111	2.07653e-09							SERPING1	-1.16564	1.82656e-06
									KIAA1211L	-0.63542	2.28627e-23							LRRC46	1.04627	2.45593e-09							GAPLINC	-3.06255	1.91504e-06
									DUOX1	-0.75108	2.43234e-23							AL357093.2	1.52297	2.85574e-09							TPRG1	-2.01646	6.28384e-06
									CLIC6	-0.689705	2.96526e-23							GSTP1	0.904008	3.08727e-09							RBP4	-1.67049	7.81774e-06
									CFD	-0.840763	3.41163e-23							MORN2	1.02794	3.56252e-09							SPARC	-2.41628	9.6677e-06
									SYT8	-1.21501	5.15676e-23							CLDN4	1.07156	3.85882e-09							GPRIN3	-1.65938	1.05241e-05
									CROCC	-0.709783	5.58518e-23							PRR29	1.19581	5.51798e-09							TIMP2	-0.968143	1.15024e-05
									CCDC81	-0.778817	7.34113e-23							CAPSL	1.05909	6.14233e-09							CPE	-2.4912	1.67713e-05
									CHST6	-0.886609	9.10339e-23							NUDT14	1.1933	8.3881e-09							FABP3	-3.10373	2.52293e-05
									LINC00964	-1.73936	9.62676e-23							DYNLL1	0.785088	9.66925e-09							OLR1	-1.10911	2.58818e-05
									PLTP	-0.976927	2.48004e-22							IFT57	0.961706	1.11019e-08							NRP1	-2.0425	2.70805e-05
									TTLL10	-0.675709	3.06594e-22							C11orf97	1.05374	1.2632e-08							TFF3	-0.639717	2.74527e-05
									TCTEX1D4	-0.656709	3.86273e-22							TCTEX1D4	0.997634	1.51652e-08							RPS19	-0.607456	3.2375e-05
									GRAMD2A	-1.43546	1.10513e-21							DMKN	0.975037	1.58606e-08							SLC16A10	-2.21954	4.75469e-05
									ABHD12B	-0.761835	1.14469e-21							SELENOW	0.791401	1.70844e-08							NUPR1	-0.713645	6.73152e-05
									SORD	-0.997303	1.1579e-21							WDR54	1.09637	2.16111e-08							INHBA	-1.74055	7.67569e-05
									SMIM5	-0.813703	2.88158e-21							BDH1	1.37987	2.27713e-08							IFI6	-1.07588	0.000163613
									ZSCAN1	-0.805566	2.97608e-21							SNTN	0.913413	2.36558e-08							MME	-1.69196	0.000286684
									ZDHHC11B	-0.9096	3.46927e-21							CLU	0.954133	2.49089e-08							HBEGF	-1.83519	0.000329272
									PEX14	-0.648034	3.61452e-21							KIF9	1.08812	2.56156e-08							LY6E	-0.796455	0.000337074
									PDK4	-1.09805	5.45836e-21							IFT43	0.981835	2.84707e-08							LGALS3BP	-0.812023	0.000417628
									KRT23	-1.10929	1.18834e-20							BNIP3	1.26621	2.93819e-08							SLC19A3	-2.77187	0.000450329
									NFE2L1	-0.866824	1.98848e-20							FBXO15	1.31373	2.99197e-08							CXCL16	-0.909812	0.000555938
									CNKSR1	-0.746427	3.0099e-20							NUDC	0.842884	3.29237e-08							RNF213	-0.996515	0.000588858
									DNAH11	-0.702773	4.26881e-20							FAM216B	1.01894	3.36135e-08							HP	-1.54331	0.000850656
									GIPR	-0.752024	5.50811e-20							ROPN1L	0.981254	3.38705e-08							C1orf162	-0.944538	0.00107095
									VILL	-0.737709	5.57224e-20							ZMYND10	0.966794	4.71968e-08							AL138963.3	-1.0268	0.00119582
									ABHD11	-0.615776	8.00684e-20							ENKUR	0.915707	5.93322e-08							HLA-DQA1	-0.686429	0.00125335
									NWD1	-0.60689	2.05581e-19							ODF3B	0.914748	5.99345e-08							MX1	-1.4274	0.00182805
									TNFRSF14-AS1	-0.749955	2.54374e-19							CATSPERD	1.15957	6.285e-08							SLC8A1	-1.39138	0.00192201
									RHPN2	-0.664281	2.74506e-19							FAM229B	1.03386	9.44192e-08							FAM102B	-1.95772	0.00218457
									SRGAP3-AS2	-0.63927	2.95389e-19							CCDC153	0.963626	9.57847e-08							BCL2A1	-1.16909	0.00220114
									DMGDH	-0.785109	3.60685e-19							FAM81B	1.01795	1.27359e-07							ALOX5	-0.930241	0.00229732
									C6orf132	-0.736541	5.16529e-19							CFAP65	1.12415	1.5336e-07							NRP2	-1.4052	0.00277752
									ETS2	-0.764163	7.72936e-19							APOD	2.10258	1.61788e-07							LPL	-1.55994	0.00288213
									BIK	-0.826666	7.92437e-19							PDLIM4	1.1006	1.85814e-07							KCNMA1	-1.85693	0.00355663
									NUP50-DT	-0.669059	8.42695e-19							RSPH9	0.968404	2.14278e-07							PPARG	-0.883606	0.00367503
									SNED1	-0.7608	9.69151e-19							IQCG	0.936529	2.30349e-07							PDE4B	-2.00898	0.00370197
									RRAD	-0.718569	3.5873e-18							DNAH12	0.680167	2.36031e-07							DDHD1	-1.62384	0.00491646
									BX284668.5	-0.913939	5.59939e-18							OMG	1.04329	2.63168e-07							AC020656.1	-2.27065	0.00502265
									FYB2	-0.637578	8.76308e-18							TEX9	0.884107	3.89071e-07							SAMSN1	-2.13569	0.00554805
									PLEKHG7	-0.595584	1.38765e-17							EFEMP1	1.25164	3.96415e-07							SLC47A1	-2.55226	0.00660328
									TMEM40	-1.00906	1.51961e-17							TSTD1	0.998177	4.38336e-07							CD14	-1.32819	0.00770637
									GMPR	-0.816469	2.05784e-17							MS4A8	0.833868	4.40222e-07							ID3	-1.67201	0.009491
									AL354754.1	-1.04727	2.67211e-17							UBAC1	0.815785	4.82558e-07							STAC	-1.24384	0.0101036
									TMPRSS4	-0.823243	2.83594e-17							FAM92B	0.954083	4.91905e-07							BTG1	-0.911075	0.0109758
									PRKCE	-0.638488	3.22659e-17							IER2	1.04772	5.11415e-07							BSG	-0.664192	0.0111423
									GRM5	-0.810767	3.63315e-17							POU2AF1	0.965858	5.385e-07							SMIM25	-0.865818	0.0125008
									CDCP1	-0.65165	3.83696e-17							C20orf96	1.0729	5.40593e-07							AC092691.1	-1.5043	0.0126551
									LINC01170	-0.785645	6.27895e-17							AGR3	0.948832	5.51753e-07							AL133415.1	-1.47035	0.0136368
									ACOX3	-0.771091	7.87766e-17							EFCAB1	0.842609	5.8708e-07							CD163	-1.17957	0.0156409
									AC099489.1	-1.48814	1.03805e-16							ALDH3B1	0.949551	6.2061e-07							C1QB	-0.604855	0.0167842
									RHOU	-0.647182	1.18824e-16							LRIG1	1.02938	6.26454e-07							SFMBT2	-2.93891	0.0220056
									CHPT1	-0.606054	1.52324e-16							CCDC113	0.882318	6.52718e-07							MSMB	-1.14723	0.0323907
									MACC1	-0.686887	2.35126e-16							TEKT2	0.848913	6.6502e-07							ZEB2	-1.09546	0.0370319
									MUC16	-0.637839	2.62043e-16							DNAH9	0.699586	6.66579e-07							GM2A	-1.31513	0.0445133
									B4GALNT3	-0.680318	1.24088e-15							CFAP73	0.882711	6.79396e-07
									ABLIM1	-0.63428	2.06663e-15							RP1	0.784382	7.18714e-07
									PHLPP1	-0.669951	3.17856e-15							EZR	0.667242	7.27275e-07
									WNT9A	-0.744472	3.6431e-15							CTXN1	0.91023	7.40865e-07
									SRD5A1	-0.832804	4.64029e-15							DEGS2	1.00041	7.70511e-07
									SPSB2	-0.64794	6.03999e-15							CFAP53	1.02106	7.83476e-07
									AHNAK2	-0.686061	7.56794e-15							C22orf15	1.13674	7.98638e-07
									ASTN2	-0.73158	9.56856e-15							AC013264.1	0.946768	8.25941e-07
									GADD45G	-0.689186	1.12956e-14							SQLE	1.2775	8.44176e-07
									PSCA	-0.906267	1.43339e-14							EFHC1	0.675276	8.58812e-07
									PITX1	-0.675694	1.47416e-14							SPAG6	0.910402	8.79692e-07
									LINC01504	-0.649777	2.09875e-14							LRRC10B	1.00372	9.04536e-07
									CST6	-0.896054	3.63724e-14							FAM174A	0.884688	9.8289e-07
									TP53I3	-0.624262	4.13053e-14							HLA-DQA2	2.07645	9.84108e-07
									COL9A2	-1.0753	7.36538e-14							MLF1	0.944936	9.95997e-07
									PPL	-0.816675	7.88507e-14							C1orf189	1.08046	1.1261e-06
									ESPN	-0.638755	1.0268e-13							EFCAB10	1.07836	1.20188e-06
									HES1	-0.748168	1.50071e-13							NEDD4L	0.879453	1.20638e-06
									ISG15	-0.625813	3.46785e-13							C11orf16	0.971452	1.24994e-06
									DLG5	-0.65644	3.82725e-13							LCA5	1.08003	1.2746e-06
									ANKRD39	-0.62674	4.25571e-13							FAIM	1.08803	1.4034e-06
									ACSF2	-0.632406	5.66148e-13							MORN5	1.1483	1.46034e-06
									SLC25A25	-0.795188	8.22975e-13							CFAP157	0.845227	1.46605e-06
									PKIB	-0.81085	8.38237e-13							C9orf135	0.956277	1.5246e-06
									ALS2CL	-0.714981	9.43011e-13							UFC1	0.728548	1.68262e-06
									TFEB	-0.704829	9.83797e-13							TUBA1A	0.771388	1.68424e-06
									TPM2	-0.798911	1.00417e-12							CCDC170	0.744438	1.70725e-06
									FAM13C	-0.837369	1.28625e-12							DRC1	0.839443	1.78675e-06
									TPPP	-0.678992	1.66751e-12							SEM1	0.639202	2.39663e-06
									NOXA1	-0.903764	1.8301e-12							TMEM232	0.782831	2.64673e-06
									APOL1	-0.627022	2.54902e-12							PRR7	1.5503	2.64945e-06
									PTPRU	-0.608206	6.32096e-12							TMEM14A	0.861177	2.6567e-06
									SAA1	-1.07669	6.74824e-12							MRPS21	0.683395	2.70854e-06
									TRMT44	-0.784705	7.30758e-12							DNAAF1	0.693368	2.7612e-06
									INAVA	-0.591896	9.7951e-12							ECT2L	0.828755	2.80614e-06
									LINC02066	-0.861636	1.17654e-11							ZDHHC1	1.15611	2.82609e-06
									TSNARE1	-0.864703	1.49323e-11							COPRS	0.710792	2.87915e-06
									USP2	-0.603561	1.53491e-11							MARCKS	0.753294	3.09018e-06
									CMBL	-0.731926	1.5594e-11							GAS8	0.868509	3.10434e-06
									ERN2	-0.61831	1.76794e-11							SRGAP3-AS2	1.14947	3.15757e-06
									UNC5B-AS1	-1.01257	4.17054e-11							TEKT1	0.778244	3.21514e-06
									STK11IP	-0.650772	4.44442e-11							DPCD	1.14979	3.46111e-06
									AQP7	-1.03572	6.53622e-11							SRI	0.709257	3.51178e-06
									AADACL2	-0.698711	7.1559e-11							MAPK15	0.836947	3.68768e-06
									STK36	-0.687244	7.61238e-11							ERICH5	1.29464	3.77313e-06
									TGFA	-0.786966	7.80467e-11							FOXJ1	0.774487	3.78336e-06
									MIR22HG	-0.635019	1.08359e-10							SPA17	0.847769	4.017e-06
									LINC01315	-0.689698	1.22514e-10							CFAP126	0.939015	4.1162e-06
									PINLYP	-0.618503	1.93468e-10							RRAD	0.675768	5.1168e-06
									LINC01031	-0.72572	1.98077e-10							DRC3	0.826807	5.24179e-06
									TBC1D16	-0.621258	2.00506e-10							CCDC74A	1.00333	5.35367e-06
									TRERF1	-0.641394	2.32382e-10							ERICH3	0.746363	5.64262e-06
									C3orf52	-0.756533	2.54032e-10							SPAG17	0.834355	5.93737e-06
									THSD4	-0.631668	4.67122e-10							EPCAM	0.774727	6.58244e-06
									AP002748.3	-0.660255	5.12243e-10							CFAP43	0.888164	6.61635e-06
									LINC01588	-0.594732	5.91255e-10							ARMC4	0.766145	6.872e-06
									ITPKC	-0.612861	7.50275e-10							NQO1	1.244	6.97459e-06
									LINC01376	-0.601211	1.05234e-09							PRSS12	1.13437	7.67483e-06
									BCL7A	-0.626377	1.35537e-09							HSBP1	0.7286	8.40879e-06
									DAB1	-0.947096	1.35943e-09							CHST9	0.791391	8.44696e-06
									LINC00598	-0.684301	1.41196e-09							TRIP13	1.15533	8.52534e-06
									FAM3B	-0.669021	1.73809e-09							IRX3	0.981523	8.54381e-06
									TPCN1	-0.706643	1.90074e-09							AC007906.2	0.838941	8.77811e-06
									RORC	-0.768389	1.95585e-09							SNRPD1	0.861806	9.0566e-06
									SCIN	-0.591031	1.97168e-09							TNFAIP8L1	0.814283	9.12342e-06
									ADSSL1	-0.928494	2.94674e-09							AL022068.1	1.08306	9.17071e-06
									EEPD1	-0.635353	4.85531e-09							KIF21A	0.982758	9.29949e-06
									KPNA7	-1.12326	5.11929e-09							NUCB2	0.825951	9.95346e-06
									SOCS3	-0.845028	6.58001e-09							PIH1D2	0.994848	1.08071e-05
									AC091729.3	-0.899731	1.10506e-08							COL28A1	0.965335	1.14764e-05
									ANKRD23	-0.69087	1.15659e-08							COA3	0.641613	1.16215e-05
									BAALC	-0.699476	1.88348e-08							CCDC146	0.824054	1.17334e-05
									RIPK4	-0.594613	3.5333e-08							ATP5IF1	0.838449	1.1761e-05
									HDAC7	-0.61388	4.2467e-08							FAM27C	1.37774	1.19469e-05
									ENPP3	-0.686321	5.15594e-08							PALLD	1.06227	1.22767e-05
									AC005237.1	-1.04891	5.49227e-08							CYSTM1	0.733896	1.29044e-05
									AC040169.1	-0.665244	6.03723e-08							AC004832.1	1.04224	1.33788e-05
									LINC01572	-0.598683	7.34284e-08							MAGI1	1.0239	1.36296e-05
									PIP	-1.00095	7.6269e-08							CEP126	0.76884	1.41861e-05
									FZR1	-0.674447	7.98808e-08							SPATA33	1.12874	1.42778e-05
									GRIK2	-0.758157	8.38611e-08							AC113349.1	1.07441	1.49963e-05
									GADD45B	-0.610465	1.05023e-07							MT1E	1.36936	1.51342e-05
									PIEZO2	-0.67372	1.30481e-07							OSBPL6	0.981188	1.53152e-05
									AC104596.1	-0.881837	1.30892e-07							FANK1	0.780228	1.54103e-05
									GRTP1	-0.605998	1.42388e-07							HMGN3	0.858859	1.58155e-05
									PLIN5	-0.61804	1.44018e-07							DYDC2	0.927935	1.60159e-05
									SLC9C1	-0.603365	2.01856e-07							STK33	0.630839	1.62456e-05
									WDR86	-0.611352	2.4663e-07							NAT1	0.878066	1.7151e-05
									CDC42BPG	-0.785047	2.5103e-07							TRAPPC2L	0.827736	1.75251e-05
									UBE2T	-0.638985	3.04541e-07							CRNDE	0.895609	1.9799e-05
									KIF26B	-0.729197	4.07487e-07							ANKRD66	0.770357	1.99846e-05
									AL136418.1	-0.7767	4.2437e-07							CFAP44	0.718212	2.07333e-05
									KLHL22	-0.63126	4.37672e-07							DNAH5	0.79576	2.14113e-05
									NXN	-0.598648	4.5714e-07							TTC29	0.837732	2.36006e-05
									SH3BGRL2	-0.605143	6.80348e-07							RIIAD1	1.21376	2.38058e-05
									NYNRIN	-0.754824	7.72533e-07							KLF6	0.684912	2.53509e-05
									LINC01759	-0.624002	7.74088e-07							ENAH	0.849347	2.61134e-05
									LAYN	-0.616127	8.94203e-07							C4orf47	0.688036	2.79576e-05
									MIR29B2CHG	-0.6557	1.09036e-06							SINHCAF	0.885777	2.84585e-05
									KRT80	-0.745838	1.13246e-06							TTC16	1.05032	2.91149e-05
									SMIM2-AS1	-0.6498	1.30987e-06							HYDIN	0.660857	3.05319e-05
									TLCD1	-0.718802	1.53178e-06							KRT18	0.673662	3.28665e-05
									GPATCH1	-0.877908	2.27726e-06							WDR35	1.03557	3.32715e-05
									ZNF750	-0.674878	7.01531e-06							PLEKHA5	0.767415	3.58895e-05
									MIGA2	-0.817044	8.11226e-06							IQCK	0.910917	3.84674e-05
									LARGE1	-0.670118	9.65046e-06							RB1CC1	0.834741	3.84887e-05
									TSPAN2	-0.609847	1.75448e-05							AZIN1-AS1	0.792647	3.85902e-05
									IFIT3	-0.751658	1.91633e-05							B9D1	0.909588	3.86282e-05
									AL109930.1	-0.761501	2.35319e-05							LBH	1.72385	4.02197e-05
									SOX15	-0.6881	2.70209e-05							EMC6	0.632546	4.05826e-05
									AP001830.1	-0.729046	2.76019e-05							C1orf158	1.01672	4.06401e-05
									SMIM6	-0.634836	5.91363e-05							MYO1D	0.969622	4.13919e-05
									TTI1	-0.675938	6.17805e-05							ENDOG	0.955726	4.16659e-05
									NDRG2	-0.619131	7.3505e-05							ALOX15	0.951023	4.19054e-05
									WNT7B	-0.602419	7.53248e-05							PLPPR3	1.34346	4.23703e-05
									ADRB1	-0.68511	0.000102851							FLNB	0.925115	4.24466e-05
									CLDN9	-0.610098	0.000166076							FAM166B	0.821014	4.44802e-05
									POMT2	-0.624887	0.000227498							PKIG	0.766723	4.47731e-05
									SNHG18	-0.603486	0.000353037							NWD1	0.733585	4.52632e-05
									PPP4R4	-0.694211	0.000422935							C2orf73	0.943119	4.55681e-05
									C2orf54	-0.682887	0.00060483							SLC44A4	0.623139	4.63332e-05
									C14orf132	-0.590636	0.000858327							GALNS	0.739291	4.67367e-05
									AL109976.1	-0.678922	0.00129904							C10orf67	0.931886	4.69204e-05
									CAPN5	-0.634204	0.0014151							TMEM190	0.742018	4.7173e-05
									ID1	-0.654824	0.00173437							CFAP52	0.702413	4.72934e-05
									FA2H	-0.65326	0.00201064							FXYD3	0.676332	4.73199e-05
									DENND2C	-0.607163	0.00209265							IFT22	0.961469	4.82956e-05
									JAG2	-0.765885	0.0032921							LMO7-AS1	1.51993	4.91853e-05
									FRMD3	-0.603056	0.00462897							SLC25A36	0.924969	5.00579e-05
									ACAP3	-0.611172	0.00629106							CFAP45	0.7573	5.07246e-05
									TMEM184A	-0.606723	0.0117094							IP6K2	1.10094	5.29287e-05
									KDM8	-0.679099	0.0208632							COLCA1	1.0971	5.43703e-05
									SOX9	-0.80109	0.0227097							DPY30	0.755884	5.47534e-05
									DGUOK-AS1	-0.649818	0.0366854							SHROOM3	0.712641	5.72624e-05
									FASN	-0.603152	0.0391783							WDR78	0.628549	5.78807e-05
																		DYNC2LI1	0.997707	5.87053e-05
																		RBM43	1.27421	5.90778e-05
																		TEX26	1.19905	5.96745e-05
																		DNAAF2	1.02612	5.99401e-05
																		TNF	2.88172	6.07834e-05
																		ANKFN1	0.693388	6.19798e-05
																		B9D2	0.859971	6.2742e-05
																		MNS1	0.775437	6.68313e-05
																		CIB1	0.60528	6.75958e-05
																		COQ4	0.752824	6.83065e-05
																		ZNF664	0.742451	6.83468e-05
																		PPIL6	0.749777	7.23223e-05
																		CENPM	0.950961	7.55196e-05
																		DNAH7	0.745512	8.01987e-05
																		LRRC23	0.768159	8.02106e-05
																		LINC02166	0.853367	8.13884e-05
																		CERS4	0.889596	8.6429e-05
																		KIF6	0.88843	8.9956e-05
																		AK8	0.844017	9.00343e-05
																		KCNJ16	1.511	9.17486e-05
																		NSUN7	0.883953	9.36804e-05
																		PLEKHS1	0.916844	9.67791e-05
																		CFAP54	0.679587	9.71132e-05
																		TMEM45B	0.837208	9.82193e-05
																		MFSD10	0.610166	9.90505e-05
																		BBOF1	1.06167	0.0001004
																		CCDC191	0.839732	0.000100926
																		CFAP221	0.878066	0.000102724
																		ADGB	0.698012	0.000107506
																		SMPD2	0.945332	0.000108373
																		TUSC3	0.785312	0.000109417
																		HHLA2	1.04524	0.000115494
																		LRRC71	0.862281	0.000117739
																		PITPNM1	0.968738	0.000118481
																		LRRIQ1	0.671317	0.000119102
																		TUBA4B	0.880383	0.00011935
																		RSPH14	0.902607	0.00011949
																		SLC22A4	0.916329	0.000119787
																		USP2-AS1	1.14286	0.000120061
																		CFAP20	0.97477	0.000120999
																		CCDC33	0.869902	0.000127353
																		RARRES3	1.05995	0.00012857
																		RGS22	0.87194	0.000133528
																		AC130456.2	0.869229	0.00013403
																		WDR63	0.804406	0.000136294
																		STOML3	0.651969	0.000137212
																		TXLNB	1.25439	0.000139343
																		DENND6B	0.737332	0.000140945
																		DNPH1	0.797419	0.000141302
																		WRB	0.842775	0.000144444
																		CCDC65	0.765891	0.000148081
																		CASC1	0.708724	0.000154577
																		RHPN1	1.00381	0.000155297
																		CCDC114	0.730227	0.000156502
																		PROS1	0.861065	0.000163716
																		TSGA10	0.672741	0.000168162
																		ACBD3-AS1	1.18788	0.00017135
																		SMIM19	0.835629	0.000172407
																		CCDC30	0.677412	0.000172791
																		HSP90AA1	0.747324	0.000176094
																		PTPRT	0.612785	0.000177137
																		DCDC2B	0.983241	0.000177346
																		MBNL2	0.93732	0.000178942
																		DNAI1	0.63595	0.000179317
																		CLDN3	0.743556	0.000179505
																		SELENBP1	0.761763	0.00018524
																		TSPAN19	0.781135	0.00018679
																		TMEM212	0.830377	0.000187197
																		ZNHIT2	1.14918	0.00018747
																		SPAG8	0.913028	0.000189531
																		DAW1	0.761967	0.000197913
																		NEK5	0.787509	0.000202905
																		MPDZ	0.910185	0.000204229
																		CCDC180	0.994357	0.000205417
																		C10orf95	0.971469	0.000212164
																		THSD4	0.795541	0.00021224
																		DTHD1	0.730123	0.000212877
																		C2orf50	1.18198	0.00022839
																		WDR93	0.991177	0.000240833
																		LINC01091	0.96368	0.000241992
																		C8orf34	0.717466	0.000249706
																		DRAIC	1.07666	0.000277019
																		CGN	0.863812	0.000278879
																		SPAG1	0.694841	0.000280545
																		COX19	1.19754	0.000284685
																		PPOX	0.685045	0.000289
																		PFN2	0.806207	0.000296372
																		SMIM5	1.13678	0.00029641
																		CFAP46	0.74119	0.000301863
																		CABCOCO1	0.721167	0.000305155
																		SLC25A4	0.906586	0.000308947
																		PLCH1	0.725273	0.000309452
																		AC007405.3	0.965549	0.000315099
																		OXLD1	0.869818	0.000319312
																		CFAP57	0.844299	0.00032395
																		ARL3	0.724234	0.000339682
																		IL5RA	1.36457	0.00036841
																		EBPL	0.803931	0.00037139
																		IGF1R	0.758447	0.000373047
																		ZNF688	0.81649	0.000376254
																		ARMC3	0.636805	0.000391162
																		MORN3	0.815065	0.000393285
																		CDHR4	0.662637	0.00040647
																		ANK3	0.618684	0.000410737
																		CCDC173	0.706608	0.000420648
																		CCDC190	0.699635	0.000431845
																		PALMD	1.06318	0.000441336
																		TMEM98	1.11306	0.000453436
																		AP001207.3	1.07654	0.000453971
																		PPIE	0.896428	0.000460144
																		MAP3K19	0.746794	0.00046449
																		EMP2	0.63391	0.000466822
																		NPHP1	0.774204	0.000467492
																		PCDH7	0.830584	0.000467708
																		CATIP	0.873197	0.000481188
																		CFAP100	0.670902	0.000482886
																		LINC01765	1.3169	0.000563855
																		SOD1	0.603441	0.000570554
																		LAMC2	0.869859	0.00057593
																		FABP6	0.817415	0.000580899
																		AK7	0.690186	0.000585881
																		PROM1	0.595251	0.000589665
																		SLC23A1	1.20975	0.000592753
																		TMEM14B	0.667752	0.000593146
																		PPP2CB	0.816218	0.000597498
																		RHOBTB3	1.38067	0.000614921
																		PLPP2	0.753978	0.000626422
																		ERGIC3	0.650571	0.000641999
																		MRNIP	0.813559	0.000653238
																		ARFGEF3	0.755034	0.000660319
																		METTL27	0.853869	0.000684993
																		TEKT4	0.896672	0.000687187
																		CFAP69	0.777829	0.000687833
																		TCTEX1D1	0.707311	0.000716524
																		TSNARE1	1.39498	0.000779277
																		AL121790.2	1.18246	0.000781167
																		SPACA9	0.870364	0.000784244
																		SRGAP3	0.867768	0.000794384
																		CXXC4	1.17323	0.00080656
																		LRRC6	0.750279	0.000840087
																		RAB25	1.15653	0.000851429
																		KLHL32	1.01053	0.000855572
																		TTC26	0.749252	0.00086357
																		EPS8L2	0.614117	0.000880865
																		ERICH6-AS1	1.01705	0.000903126
																		VWA3A	0.695186	0.00090788
																		GADD45B	0.978724	0.000927218
																		SPAG16	0.619631	0.000927522
																		TMEM54	0.904145	0.000940268
																		HSPA1B	0.82363	0.000970721
																		VPS25	0.824481	0.00101332
																		PDLIM7	1.26278	0.00103502
																		STMND1	0.863024	0.00105125
																		PSCA	1.56496	0.00105711
																		BAIAP2L1	0.732983	0.00105798
																		CCDC157	0.95828	0.00106891
																		ELN-AS1	0.991984	0.00107287
																		CFAP298	0.608433	0.00108594
																		CROCC	0.65086	0.00109368
																		HSD17B13	1.61059	0.00110839
																		MAP6	0.745494	0.00113752
																		CFAP300	0.642272	0.00119537
																		LYPD6B	0.88688	0.00119756
																		IQCD	0.826478	0.00121705
																		WDR19	0.705609	0.00122639
																		CCDC74B	0.85895	0.0012355
																		HINT2	0.673872	0.00126513
																		KIAA1257	0.942186	0.00129757
																		LARP6	1.28066	0.00133512
																		FGF14	0.674582	0.00135278
																		C6orf118	0.670825	0.00135762
																		PSENEN	0.709756	0.00136711
																		BEST4	1.16735	0.00137477
																		CALML4	0.755144	0.00144633
																		EAPP	0.675655	0.00148484
																		OSCP1	0.709505	0.00152212
																		HSPBP1	0.64774	0.00152682
																		LINC01571	0.958715	0.00158621
																		WDR66	0.635778	0.00160218
																		RAB40B	1.03669	0.00165333
																		KIF27	0.738282	0.00167929
																		WDR34	0.791697	0.00169807
																		DNAAF3	0.778333	0.00170806
																		TRAF3IP1	0.639672	0.00178995
																		CNN3	0.777988	0.00185308
																		ZNF273	0.906963	0.00189142
																		LCA5L	0.944295	0.0019029
																		TCTEX1D2	0.757631	0.0019041
																		SSBP3	0.771061	0.0019262
																		RSPH4A	0.723067	0.00201583
																		GRIN3B	0.916621	0.00203901
																		ZBBX	0.59682	0.0020577
																		CFAP70	0.73036	0.00208747
																		MOK	0.838654	0.00218737
																		AHSA1	0.771687	0.00219226
																		TMC4	0.767296	0.0021959
																		C8orf37-AS1	0.9309	0.00220232
																		GPR162	0.756117	0.00221272
																		ZC2HC1A	0.819893	0.00226414
																		CDKL1	1.1328	0.00226439
																		BICDL2	0.75184	0.00226598
																		FNDC11	1.32171	0.00226662
																		BCO2	0.972518	0.00232084
																		CDC14A	0.943669	0.00243395
																		STOX1	0.777011	0.00247151
																		DNAJB4	1.52155	0.00247962
																		UBXN11	0.68215	0.00249404
																		NME7	0.613509	0.00265663
																		C15orf65	0.968335	0.0027425
																		CAVIN3	1.0541	0.00274819
																		TP73	0.665287	0.002765
																		NEK11	0.67167	0.00277781
																		CFAP61	0.824201	0.00279873
																		TTC25	0.60687	0.00281012
																		PERP	0.643772	0.00282354
																		CITED4	0.947557	0.00284086
																		CFAP97D2	1.03127	0.00286681
																		FAM149A	0.99882	0.00289491
																		ALDH16A1	0.932315	0.00308906
																		CAPS2	0.879187	0.00319382
																		GULP1	0.85896	0.00321227
																		AC008771.1	1.04127	0.00330152
																		PTPRK	0.615498	0.00336147
																		SPATA6L	0.725829	0.0033627
																		C21orf58	0.674031	0.00338098
																		C17orf97	0.82442	0.00340079
																		NME9	0.766707	0.00346759
																		BCAS1	0.691366	0.00354891
																		BRD3OS	0.925108	0.00369296
																		JHY	0.85428	0.00369794
																		LLGL2	0.816657	0.00379715
																		LEKR1	0.631982	0.00382758
																		NFIB	0.719452	0.00382982
																		PARD3	0.818469	0.00386231
																		WHRN	0.736968	0.00392343
																		CC2D2A	0.724865	0.00396624
																		IGF2BP2	0.666084	0.00396697
																		CDS1	0.659111	0.00402607
																		AC084033.3	0.776309	0.0041357
																		NHLRC4	0.858006	0.00418881
																		VTA1	0.793749	0.00420518
																		CLUAP1	0.613194	0.00421835
																		IFT88	0.647861	0.00426295
																		ZNF428	0.653177	0.00430443
																		PSPH	1.12698	0.0044002
																		LPAR3	1.14771	0.00447545
																		DUSP14	0.936403	0.00454707
																		DNAAF5	1.01329	0.00460208
																		IQANK1	0.808484	0.00465345
																		TTLL9	0.724033	0.00465983
																		MAPK10	0.610834	0.00483402
																		MAP7	0.945663	0.00487664
																		C7orf57	0.636386	0.00499455
																		DNAL1	0.687547	0.00505494
																		STAP2	1.23354	0.00510039
																		TSNAXIP1	0.965205	0.00513277
																		RFX3-AS1	0.764105	0.00520477
																		ARL6	0.722578	0.00523516
																		LKAAEAR1	1.05412	0.00536836
																		THNSL2	1.1015	0.00556803
																		FILIP1	0.694638	0.00567104
																		FYB2	0.785044	0.00569538
																		PTPRN2	0.661545	0.00570334
																		AK9	0.663849	0.00574556
																		SPEF1	0.921847	0.00598707
																		SPTBN1	0.765716	0.00601534
																		DNAAF4	0.699136	0.00602289
																		PPP1R32	1.2754	0.00612268
																		MMAB	0.961589	0.00618949
																		ERBB3	0.90319	0.0061927
																		CSNK1G2	0.675515	0.00627778
																		IQCE	0.668577	0.00632062
																		TCTN1	0.76325	0.00635397
																		REC8	0.901482	0.00635919
																		AL121899.1	0.917116	0.00637974
																		AC027237.3	1.23572	0.00641977
																		UBXN10	0.780211	0.0065466
																		HAGHL	0.806248	0.00663643
																		CHCHD6	0.748042	0.00670005
																		COBL	0.815617	0.00676171
																		TOGARAM2	0.669045	0.0068906
																		CCDC151	0.762233	0.00705346
																		ATP2C2	0.711306	0.00713871
																		NEGR1	0.674252	0.00722806
																		PPP1R36	1.05103	0.00733336
																		POLR2I	0.819007	0.00743963
																		CCDC96	0.974996	0.0074487
																		DNAH2	0.762689	0.00745986
																		AGBL2	0.634313	0.00750858
																		USP10	0.669539	0.00781455
																		CBY1	0.806919	0.0080628
																		RARB	1.10635	0.00812039
																		ARL13B	0.753083	0.00817277
																		UPF3A	0.724997	0.00819201
																		FAM227A	0.676953	0.00822493
																		CEP170B	0.890767	0.008447
																		COG7	0.895143	0.00850153
																		RBM24	1.5068	0.00876011
																		DHX40	0.688733	0.00890059
																		TJP3	0.605241	0.00890296
																		NXN	0.758155	0.00900004
																		ALDH1L1	1.06649	0.00939337
																		FGD5-AS1	0.600738	0.00943484
																		PPP1R14C	0.823989	0.00958117
																		C1orf141	0.623538	0.00990789
																		AC060780.1	0.800837	0.0100258
																		JPT2	0.697191	0.0101281
																		PTK2	0.622393	0.010503
																		PRRG4	1.05678	0.0105282
																		KALRN	1.23174	0.0106759
																		IFT27	0.804692	0.0107982
																		LRRC49	0.785987	0.0108331
																		HSPA1A	0.722032	0.0110391
																		MEAF6	0.650688	0.0111439
																		PPP1R10	0.591683	0.0113245
																		EBNA1BP2	0.652418	0.0114171
																		ARHGAP39	0.809432	0.0115228
																		DNAJA4	0.683059	0.0117435
																		GON7	0.644975	0.0119313
																		AC078864.2	0.975747	0.0120536
																		SORBS2	0.715197	0.0121906
																		TMEM107	0.686503	0.013094
																		NDUFAF6	0.837934	0.0131848
																		DPY19L3	1.0916	0.0132188
																		PBX1	0.878648	0.0132286
																		SSBP2	0.669515	0.0132761
																		TPM2	1.38549	0.0134853
																		ARMC2	0.657854	0.013851
																		SELENOP	0.871332	0.0143044
																		SPATA4	0.908284	0.0143413
																		ZFHX2	0.854698	0.0147445
																		RIPOR2	0.849368	0.0148809
																		PTOV1	0.692172	0.0149187
																		SPATA20	1.37043	0.0155185
																		RPA3	0.674317	0.0155342
																		CFAP161	1.34663	0.0156488
																		KRTCAP3	0.865099	0.0161745
																		ZNF487	0.673086	0.0162608
																		F11R	0.603473	0.0164621
																		ANKRD54	0.862495	0.0175038
																		RBKS	0.907806	0.0184006
																		CCDC17	0.633631	0.0188973
																		TMEM68	1.05396	0.0189066
																		IQCH	0.656392	0.0189499
																		EPHX1	0.759426	0.0192028
																		RUVBL2	0.715621	0.0204026
																		DLL1	0.708167	0.020489
																		DYNC2H1	0.598622	0.0206995
																		PRICKLE2	0.629417	0.0207728
																		CFAP58	0.72248	0.0211253
																		AC020911.2	0.746099	0.0213113
																		RNF5	0.638256	0.0216898
																		MCAT	0.781069	0.0229912
																		CCDC28A	0.658524	0.0241938
																		C9orf72	0.642543	0.0248198
																		ITGA2	0.933946	0.025004
																		BTBD3	0.647462	0.0251381
																		CTTN	0.856772	0.0251492
																		SIGIRR	0.799873	0.0251496
																		FUZ	0.943266	0.0256966
																		TTC21A	0.798989	0.0259696
																		UNC119B	0.779273	0.0260906
																		SH3YL1	0.745923	0.0262529
																		SLFN13	0.786144	0.0266366
																		FOSB	1.14489	0.0267604
																		MINDY2	0.642879	0.0268235
																		LSR	0.745839	0.0271394
																		PARVA	0.733026	0.0271538
																		IFT81	0.637166	0.0273274
																		URB1-AS1	1.29891	0.0273444
																		BZW2	0.800089	0.0278117
																		MNAT1	0.700202	0.0278245
																		EFHB	0.594085	0.0285859
																		SLC16A5	1.10994	0.0295988
																		ITGB4	1.0171	0.0296894
																		ALDH3A1	0.758373	0.0297091
																		LONP1	0.969415	0.0297759
																		EFCAB12	0.687483	0.0303198
																		DZANK1	0.798034	0.0314423
																		HNF4G	1.37599	0.0320974
																		FAM184A	0.753662	0.0322286
																		RORC	1.46703	0.0342306
																		AQP4-AS1	0.918494	0.0347826
																		TMEM116	0.868907	0.0348191
																		AC004990.1	1.08538	0.0357264
																		BX284668.5	0.752957	0.037237
																		AADACL2-AS1	0.913882	0.0373855
																		TRMT9B	0.750797	0.0374913
																		C11orf74	0.67826	0.0378855
																		SPATA18	0.601263	0.0381861
																		FAS	1.1147	0.0382621
																		ASB7	0.992604	0.0391056
																		AP4M1	0.730762	0.0391631
																		MAP1A	0.678847	0.0408284
																		BAIAP3	0.713188	0.0411629
																		NRAV	0.990165	0.0415537
																		CERKL	0.789111	0.0416861
																		DMTN	0.83348	0.0419173
																		TEAD1	0.663859	0.0436178
																		AADACL2	1.26922	0.0454306
																		MAGI2	0.720639	0.0459084
																		EP300-AS1	1.24883	0.0473626
																		RCAN3	0.649947	0.0480925
																		WFDC6	0.832605	0.0485679
																		AP1M2	0.761627	0.0489285

## Sheet: 10. Epith subtypes BAL DEG DEP 
Acute																						Recovery
	Gene: Up in Unvaxed				Protein: Up in Unvaxed						Gene:Up in Vaxed					Protein:Up in Vaxed						Gene:Up in Unvaxed					Protein:Up in Unvaxed					Gene:Up in Vaxed						Protein:Up in Vaxed
Cluster	Symbol	Avg_Log2FC	p_Val_Adj		ID	Cluster	Symbol	Avg_Log2FC	p_Val_Adj		Cluster	Symbol	Avg_Log2FC	p_Val_Adj		ID	Cluster	Symbol	Avg_Log2FC	p_Val_Adj		Cluster	Symbol	Avg_Log2FC	p_Val_Adj		Cluster	Symbol	Avg_Log2FC	p_Val_Adj		Cluster	Symbol	Avg_Log2FC	p_Val_Adj		ID	Cluster	Symbol	Avg_Log2FC	p_Val_Adj
0	COL28A1	1.75115	6.39179e-18		CD48	0	Hu.CD48	1.22747	6.90318e-07		0	LKAAEAR1	-3.90837	1.08983e-22		CD101	10	Hu.CD101	-0.946232	1.68335e-07		none					none					10	AC013457.1	-14.6957	0.0411688		CD69	10	Hu.CD69	-1.59037	0.00628054
0	AC113349.1	0.977735	9.47677e-11		CD52	0	Hu.CD52	0.449644	0.0046912		0	AC100781.1	-3.70448	4.04819e-17		CD101	0	Hu.CD101	-0.370622	0.000262183												10	KLRB1	-13.2692	0.0411688		IGKC	10	Hu.Ig.LightChain.k	-0.870182	0.0175441
0	PSPH	1.29334	1.59418e-08		CD3	0	Hu.CD3-UCHT1	0.887649	0.0100494		0	LMTK3	-2.69499	1.04121e-09		CD101	5	Hu.CD101	-0.764983	0.000329457												10	GZMB	-16.5196	0.0411688
0	TIMP4	1.66612	6.06808e-08		CD79B	10	Hu.CD79b	0.447935	7.51405e-06		0	AL357093.2	-0.765139	3.00347e-09		CD101	14	Hu.CD101	-0.657139	0.047275												10	MT1G	-16.4531	0.0411688
0	DYNC2LI1	0.791552	5.55509e-07		KIR2DL1	10	Hu.CD158	0.60339	0.0135501		0	SULT2B1	-3.09111	3.29939e-08		ITGAE	10	Hu.CD103	-1.21487	0.000841821
0	TCTEX1D2	0.793968	5.70851e-07		CD79B	11	Hu.CD79b	0.752315	0.00560492		0	UBE2H	-0.697386	5.65884e-06		LAMP1	10	Hu.CD107a	-1.09138	2.85813e-07
0	NUDT14	1.04192	3.16063e-06		TNFRSF14	11	Hu.CD270	0.398719	0.0217066		0	TSHZ2	-0.856238	8.4304e-06		NECTIN2	5	Hu.CD112	-0.34846	0.00492667
0	FKBP6	1.34151	4.33656e-06		ICAM1	12	Hu.CD54	0.95664	8.05422e-07		0	NUPR1	-0.694034	2.66199e-05		IFNGR1	0	Hu.CD119	-0.514843	4.93437e-08
0	LINC00326	1.39093	7.35739e-06		GGT1	12	Hu.CD224	0.682138	2.73316e-05		0	SULT1A1	-0.920427	3.27358e-05		IFNGR1	2	Hu.CD119	-0.32665	0.00140245
0	FP671120.1	2.07319	1.91426e-05		CCR5	12	Hu.CD195	0.531161	8.93376e-05		0	CIT	-3.17365	3.7567e-05		IFNGR1	14	Hu.CD119	-0.716298	0.000995856
0	CYP2B6	2.51688	0.000111301		DDP4	12	Hu.CD26	0.768449	0.000141882		0	CTSD	-0.672608	3.93099e-05		IFNGR1	7	Hu.CD119	-1.0243	0.000276496
0	NDUFC2	0.982113	0.000197319		CD44	12	HuMs.CD44	0.831474	0.00186383		0	GRAMD2A	-1.63755	4.02177e-05		IFNGR1	10	Hu.CD119	-0.65596	2.13966e-06
0	RYR3	1.46169	0.000795087		CD48	12	Hu.CD48	1.22591	0.0276834		0	S100A13	-0.701736	0.000393785		ITGAL	14	Hu.CD11a	-1.02704	0.00102522
0	SKAP2	1.49177	0.000913945		IL4R	14	Hu.CD124	0.928508	0.0138768		0	CTSB	-0.645495	0.000445133		ITGAL	10	Hu.CD11a	-1.37481	4.15177e-06
0	TM9SF2	0.59287	0.000921004		CD48	2	Hu.CD48	1.55094	1.88599e-09		0	TNFSF10	-0.945672	0.000799956		ITGAM	10	Hu.CD11b	-1.04599	0.00118731
0	SLC22A16	0.812413	0.00129727		CD52	2	Hu.CD52	0.750738	7.99155e-07		0	TACC2	-0.72954	0.000971341		ITGAM	14	Hu.CD11b	-1.43903	0.000791859
0	COTL1	3.55587	0.00190653		CD5	2	Hu.CD5	1.19794	0.000746925		0	CHPT1	-1.51704	0.00101018		ITGAX	10	Hu.CD11c	-1.61764	1.14396e-05
0	AC104035.1	1.10179	0.00392087		PTPRC	2	Hu.CD45-HI30	1.09793	0.00369925		0	FXYD1	-1.00458	0.00103664		ITGAX	14	Hu.CD11c	-2.0728	2.45815e-05
0	MRPL23	0.724779	0.00880672		CD48	5	Hu.CD48	1.17956	0.0117678		0	SH3BP5	-1.38058	0.00328464		ANPEP	10	Hu.CD13	-0.950885	0.000583579
0	MYOM2	2.61199	0.0108262		CD2	5	Hu.CD2	1.19598	0.0127464		0	SORD	-1.33509	0.0044671		THBD	10	Hu.CD141	-0.761709	1.04287e-06
0	DOCK8	1.08902	0.0139223		CCR4	6	Hu.CD194	0.665326	0.00137176		0	WIPI1	-0.849409	0.00471637		PVR	10	Hu.CD155	-0.4372	0.0148618
0	AC023300.2	0.793197	0.0168701		CD52	6	Hu.CD52	0.524416	0.00561402		0	AL445584.2	-1.6399	0.00543467		FCGR3A	10	Hu.CD16	-0.759819	0.0100767
0	OXTR	0.919436	0.0250424								0	ATF3	-0.760696	0.00658898		CD163	14	Hu.CD163	-0.897676	0.0157754
1	COL28A1	3.40069	0.00161349								0	CAPN13	-1.66457	0.00936694		SIGLEC1	10	Hu.CD169	-0.596077	0.000110698
1	ABCA13	1.46151	0.0095245								0	ABHD2	-0.655778	0.0162747		SIGLEC1	14	Hu.CD169	-0.747036	0.000869099
10	SCGB1A1	4.49517	0.0021772								0	MTSS1	-0.655481	0.0176803		ITGB2	10	Hu.CD18	-1.43559	7.35872e-06
10	RPS2	0.825973	0.0068365								0	LAMB3	-1.80486	0.022866		ITGB2	14	Hu.CD18	-1.20152	0.00072768
10	LYZ	1.63086	0.00725585								0	BZW2	-0.856158	0.0281044		CD22	10	Hu.CD22	-1.36974	5.40698e-05
10	SERPINB3	6.98879	0.00762922								0	TXNIP	-0.599226	0.0290308		LAG3	10	Hu.CD223	-0.538748	0.00166505
12	LMO3	2.37053	5.73469e-09								0	TMEM40	-1.0905	0.0361557		DPP4	11	Hu.CD26	-0.906558	0.000802076
12	ADK	1.5364	2.80998e-07								0	VGLL3	-2.17124	0.0363435		CD274	10	Hu.CD274	-0.433174	0.0481855
12	DLC1	2.29367	6.83963e-07								0	LINC01504	-1.01923	0.0382282		ITGB1	2	Hu.CD29	-0.396625	9.12211e-10
12	CELF2	1.59711	5.55979e-06								0	CBR1	-0.701625	0.0382939		ITGB1	0	Hu.CD29	-0.373919	2.27338e-14
12	RAB27B	1.75964	9.62411e-06								0	CARHSP1	-0.687598	0.0454738		ITGB1	6	Hu.CD29	-0.347851	1.22202e-07
12	CPM	1.64596	1.04296e-05								0	DUSP1	-0.975171	0.0469755		ITGB1	14	Hu.CD29	-0.963387	1.06007e-05
12	CFAP221	2.53092	2.46433e-05								0	IFITM10	-1.9957	0.047304		ITGB1	7	Hu.CD29	-0.85142	0.000137703
12	PEG10	3.27033	5.12047e-05								1	GSTP1	-0.736267	0.0109017		ITGB1	10	Hu.CD29	-1.05632	2.34818e-07
12	AC027288.3	2.25673	5.22827e-05								10	AC013457.1	-7.50857	3.91055e-08		PECAM1	10	Hu.CD31	-1.44221	4.87112e-06
12	SFTA3	1.56044	0.000121426								10	PTCRA	-3.55351	5.63336e-06		PECAM1	0	Hu.CD31	-0.761774	0.0107591
12	PTPRD	2.81928	0.000179628								10	FOLR3	-3.59937	7.74681e-06		PECAM1	14	Hu.CD31	-1.73374	0.000324118
12	STARD13	2.34396	0.000231678								10	TXN	-1.49519	2.3699e-05		SLAMF7	10	Hu.CD319	-0.912132	0.00780205
12	SFTPB	1.2674	0.000339742								10	SMIM25	-1.95531	0.000196248		FCGR2A	14	Hu.CD32	-1.19361	0.000133378
12	CXCL2	2.13012	0.00036121								10	AGRP	-2.17026	0.00021733		FCGR2A	10	Hu.CD32	-1.20491	8.32993e-06
12	ACOXL	2.39881	0.00037476								10	DEFB1	-3.61008	0.00047277		SIGLEC7	14	Hu.CD328	-2.48031	5.90097e-05
12	SAMD4A	1.45661	0.00038438								10	IFIT3	-2.82069	0.000705904		SIGLEC7	10	Hu.CD328	-2.18565	3.33069e-06
12	AC007952.4	1.45914	0.000393562								10	S100A4	-1.08856	0.00194524		CD33	10	Hu.CD33	-1.80927	2.76772e-05
12	SHC3	2.81317	0.000502994								10	FAU	-0.783942	0.00224189		CD36	14	Hu.CD36	-1.8723	0.00342367
12	IFT57	1.48923	0.00055974								10	RPS28	-0.827561	0.00388168		CD38	0	Hu.CD38-HIT2	-0.746081	7.13544e-29
12	OSMR	1.6665	0.000608134								10	RBP4	-3.806	0.00397993		CD38	7	Hu.CD38-HIT2	-0.990851	1.43783e-05
12	ATP11A	1.43174	0.000660628								10	ECI2	-2.86351	0.00589061		CD38	13	Hu.CD38-HIT2	-0.712104	0.016577
12	FRY	2.17123	0.000670398								10	AC025048.4	-5.50065	0.00599816		CD38	10	Hu.CD38-HIT2	-0.655393	0.00477203
12	LMO7	1.10595	0.000761629								10	LINC02345	-2.4012	0.00865337		CD38	5	Hu.CD38-HIT2	-0.796096	0.0145385
12	LPCAT1	1.34563	0.000775115								10	ELOB	-1.16389	0.00921638		CD38	2	Hu.CD38-HIT2	-0.691523	5.59227e-19
12	CAV1	1.2031	0.000784378								10	CFDP1	-1.94876	0.0103325		CD38	6	Hu.CD38-HIT2	-0.603805	9.46143e-12
12	MBNL1	1.12119	0.000799221								10	RPS26	-1.28833	0.0104429		CD38	14	Hu.CD38-HIT2	-1.11784	6.1663e-06
12	CLIC5	1.69176	0.000903845								10	NDUFC1	-1.65077	0.0126197		CD4	10	Hu.CD4-RPA.T4	-0.625023	0.0263798
12	PLPP1	1.60779	0.00103536								10	PSMB5	-1.79253	0.0133802		CD4	14	Hu.CD4-RPA.T4	-0.742602	0.00099633
12	FNIP2	1.73081	0.00103848								10	S100A11	-0.854142	0.0189588		PTPRC	14	Hu.CD45-HI30	-0.909245	0.00306053
12	STK33	1.76937	0.00126818								10	ATP5F1E	-1.17562	0.0214021		PTPRC	7	Hu.CD45RA	-1.11084	0.0224105
12	SLC39A8	1.20766	0.00127635								10	LIMS2	-5.53075	0.0216307		CD47	10	Hu.CD47	-0.89613	0.000214797
12	ANKRD50	1.84766	0.0013683								10	C18orf32	-1.05053	0.0222585		CD47	2	Hu.CD47	-0.545574	4.77073e-06
12	ITGA3	1.28299	0.00141395								10	C2orf74	-2.52487	0.022829		CD47	0	Hu.CD47	-0.65442	5.09152e-11
12	NPNT	1.96599	0.00170871								10	PFDN5	-0.916428	0.0231344		CD47	11	Hu.CD47	-1.47738	0.0106526
12	TNS1	1.25422	0.0017962								10	UBE2D1	-1.6342	0.0233756		CD47	5	Hu.CD47	-0.856404	0.0407248
12	C8orf34	1.95798	0.0019325								10	CSTA	-1.82097	0.0256893		CD47	14	Hu.CD47	-1.31625	4.25675e-05
12	TNIK	1.81925	0.00235309								10	GPX4	-1.07372	0.0346667		CD47	6	Hu.CD47	-0.415923	0.0217418
12	ITGA9	2.9447	0.0025419								10	PHYH	-2.10063	0.0374298		CD47	7	Hu.CD47	-1.07394	0.00131238
12	BMP1	1.72303	0.00254432								10	BATF3	-2.51228	0.0393643		ITGA1	10	Hu.CD49a	-0.876652	0.000344356
12	COL4A4	0.949274	0.00258455								10	S100A13	-1.56661	0.0415037		ITGA2	14	Hu.CD49b	-1.13828	0.0267201
12	PRKCZ	1.18438	0.00259161								10	PCBD1	-1.68854	0.0424062		ITGA2	2	Hu.CD49b	-0.525755	5.205e-11
12	SLC22A31	1.40845	0.00261792								10	GAPLINC	-2.44089	0.0456196		ITGA2	0	Hu.CD49b	-0.408488	1.97806e-13
12	SGMS2	1.20516	0.00265342								11	PDZK1IP1	-5.63318	0.000119014		ITGA2	6	Hu.CD49b	-0.407759	6.81476e-09
12	WDR6	1.2427	0.00277203								11	ZSCAN32	-3.91286	0.00153427		ITGA2	7	Hu.CD49b	-1.34703	4.99576e-06
12	CAPN8	1.29886	0.00281307								12	EYA2	-7.01831	5.13788e-05		ITGA2	5	Hu.CD49b	-0.963937	0.0060433
12	BTBD9	1.61053	0.00292682								12	CES1	-6.98811	0.000164463		ITGA4	14	Hu.CD49d	-0.734626	0.0010419
12	AREG	1.49352	0.0029604								12	MUC16	-6.44648	0.000558171		CD52	10	Hu.CD52	-0.428119	0.0194478
12	TMEM163	2.1355	0.0029812								12	CSTA	-7.77585	0.000782699		ICAM1	14	Hu.CD54	-1.30804	2.22424e-05
12	GLS	1.20712	0.00308463								12	FAM3D	-15.2024	0.00105963		ICAM1	10	Hu.CD54	-0.603299	0.00601092
12	CYR61	1.38999	0.00320909								12	ALDH3A1	-7.08605	0.0014973		CD58	10	Hu.CD58	-0.652771	1.99938e-08
12	VEPH1	2.02239	0.00376846								12	RPS26	-0.973286	0.0021793		SELL	14	Hu.CD62L	-1.94366	4.30513e-05
12	DPYSL2	1.33879	0.0041048								12	PITX1	-13.1246	0.00236894		FCGR1A	10	Hu.CD64	-1.59728	3.70801e-06
12	TRIO	0.902834	0.00416634								12	LYPD6B	-6.72441	0.00504212		TFRC	10	Hu.CD71	-1.21386	2.28969e-06
12	FN1	1.93434	0.00437371								12	DHRS9	-14.0826	0.00523616		TFRC	14	Hu.CD71	-0.955091	0.00170376
12	VIM	1.12714	0.00448097								12	ADH7	-13.3254	0.00523616		NT5E	0	Hu.CD73	-0.904801	7.25206e-05
12	TUBA1A	1.2452	0.00525858								12	CYP2F1	-14.2555	0.00523616		NT5E	9	Hu.CD73	-1.12199	0.0236624
12	DDAH1	1.12999	0.00532391								12	GABRP	-10.0395	0.00839443		CD81	12	Hu.CD81	-0.733051	0.000320027
12	NEDD4L	1.27728	0.00536455								12	PSCA	-8.01744	0.00906496		CD81	14	Hu.CD81	-0.89349	6.85387e-05
12	NEDD9	1.29699	0.00577867								12	CDC42EP5	-5.27118	0.0109886		CD81	10	Hu.CD81	-0.890196	5.79475e-06
12	MBNL2	1.30692	0.00632839								12	PRR15	-12.5103	0.0114459		CD86	14	Hu.CD86	-1.80035	1.95569e-05
12	LPP	1.10593	0.0064923								12	LYPD2	-18.4374	0.0114459		CD86	10	Hu.CD86	-1.964	5.01598e-07
12	AC019117.1	2.22323	0.00698337								12	HOXB2	-12.2377	0.0114459		C5AR1	10	Hu.CD88	-1.13213	3.60792e-08
12	STXBP1	1.58096	0.0070255								12	UPK1B	-9.74284	0.0116651		FAS	0	Hu.CD95	-0.431257	1.29317e-17
12	DNM2	1.19396	0.00814859								12	CHST9	-9.77683	0.0116651		FAS	14	Hu.CD95	-0.644385	1.62298e-05
12	KCNJ15	1.47818	0.00824188								12	NDRG2	-5.16244	0.0150585		FAS	7	Hu.CD95	-0.884361	5.17187e-09
12	TOX	2.24077	0.00837932								12	AC084816.1	-8.84453	0.0188032		FAS	2	Hu.CD95	-0.414392	2.11988e-13
12	SFTA2	0.900841	0.00867814								12	LINC01133	-6.65703	0.0202888		FAS	11	Hu.CD95	-0.907901	0.00348934
12	PAPSS2	1.54586	0.00871403								12	TMPRSS4	-6.45071	0.0225457		FAS	6	Hu.CD95	-0.358184	8.56769e-07
12	CD55	0.775942	0.00917627								12	AES	-0.997439	0.0246654		CLEC12A	10	Hu.CLEC12A	-1.62163	1.61619e-07
12	GPRC5A	0.782793	0.00995755								12	LINC01889	-12.9962	0.0247509		CLEC12A	14	Hu.CLEC12A	-1.54372	0.000761923
12	DCLK1	0.907695	0.0101906								12	RNF152	-12.6276	0.0247509		HLA-A	10	Hu.HLA.ABC	-1.21771	0.000583546
12	HOPX	0.617801	0.0103927								12	PLCB4	-6.36072	0.0335042		HLA-A	14	Hu.HLA.ABC	-1.25721	0.000514725
12	SYNE1	1.19095	0.012148								12	ATP12A	-8.97447	0.0416341		HLA-DRA	0	Hu.HLA.DR	-0.487953	9.7171e-06
12	AC112206.2	2.39259	0.0122553								12	IDO1	-6.52813	0.0466036		HLA-DRA	10	Hu.HLA.DR	-0.958361	1.11208e-06
12	DNAH14	1.78678	0.0124557								13	CEACAM1	-3.5248	0.0016531		HLA-DRA	6	Hu.HLA.DR	-0.45053	0.0266714
12	PRICKLE2	2.31278	0.012824								13	HLA-DQB2	-11.0574	0.00380853		IGKC	10	Hu.Ig.LightChain.k	-0.548167	1.00462e-07
12	LAMC1	1.35489	0.0131803								13	ZNF98	-4.71732	0.00457589		IGHM	6	Hu.IgM	-0.416079	0.00187779
12	SLC34A2	1.10888	0.0135327								13	HLA-B	-1.38647	0.00473722		IGHM	2	Hu.IgM	-0.387191	0.00773999
12	SLC44A5	2.01261	0.0140963								13	C1R	-3.32868	0.0194314		CD44	7	HuMs.CD44	-0.952654	0.00126779
12	PTEN	1.0278	0.0152955								14	IGLVI-70	-15.3553	8.74968e-06		CD44	10	HuMs.CD44	-1.48615	1.22055e-05
12	ADGRD1	1.50909	0.0161971								14	TRBV5-6	-15.1406	8.76069e-06		CD44	14	HuMs.CD44	-0.811462	0.0274496
12	SCGB3A2	3.18362	0.0170488								14	IGLV3-19	-19.6828	8.76069e-06		ITGA6	2	HuMs.CD49f	-0.461376	4.12519e-05
12	LIMS1	1.24701	0.0180209								14	IGLC2	-4.45654	0.000100148		ITGA6	6	HuMs.CD49f	-0.64068	1.83728e-06
12	DENND3	1.38376	0.0187381								14	MUC5B	-14.2615	0.000181159		ICOS	14	HuMsRt.CD278	-0.929383	0.00119314
12	TXNDC11	1.37574	0.0189851								14	SCGB3A1	-2.28598	0.000201277
12	MICAL2	1.15475	0.0200801								14	SCGB1A1	-3.30456	0.000228174
12	DGKD	1.42591	0.0218636								14	CLIC3	-4.70551	0.000536258
12	DNAH11	3.0389	0.0227077								14	APOC1	-2.20424	0.00144106
12	TMCC1	1.08583	0.0233699								14	TMSB10	-1.27372	0.00156698
12	NEIL1	1.74339	0.0254233								14	BPIFB1	-2.53708	0.0016229
12	PPP1R9A	1.28796	0.0255586								14	MSMB	-3.12496	0.00186144
12	AGR3	1.15721	0.0259358								14	ATP5F1E	-1.11637	0.00194385
12	C1orf198	1.61745	0.0284346								14	RARRES3	-2.09006	0.00198186
12	NARF	1.12307	0.0285576								14	RPS28	-1.29495	0.00216385
12	CITED2	0.980562	0.028857								14	RNASE1	-3.09719	0.00240455
12	FAM20A	1.49346	0.0289835								14	FAU	-1.01544	0.00267667
12	AP2B1	1.00777	0.030261								14	RPL41	-0.847458	0.00297835
12	MLLT3	1.38123	0.0307203								14	RPL28	-0.903935	0.00367868
12	CTSE	0.711289	0.0310409								14	RPS15	-1.04835	0.00408351
12	IGLV3-1	11.6564	0.0312873								14	LGMN	-2.62583	0.00537641
12	AATK	3.42391	0.0322039								14	SERF2	-1.01855	0.00558781
12	STK17A	0.922644	0.0370974								14	RPL12	-1.00753	0.00686761
12	PTPRM	1.08734	0.039763								14	MZT2A	-2.76387	0.00812051
12	DNAH5	2.00772	0.0401965								14	HIST1H4C	-2.1703	0.00848817
12	SFTA1P	0.704716	0.0459642								14	CYTOR	-2.83202	0.00946834
12	ARHGAP24	1.131	0.0472026								14	STK17A	-2.10174	0.00974069
13	MTRNR2L12	2.10552	0.0273665								14	IGLC3	-5.35955	0.0112762
14	LYZ	3.3483	7.41157e-05								14	HAMP	-13.6734	0.0114927
14	LMNA	3.07449	0.000176012								14	HIST1H1D	-3.53248	0.0125401
14	TPT1	1.11701	0.00041713								14	JCHAIN	-0.947297	0.0137212
14	HLA-DRA	2.15426	0.000466698								14	NAP1L4	-2.65987	0.0159147
14	EEF1A1	1.42755	0.000652205								14	ATP5MG	-1.16171	0.016571
14	MT-CO1	3.35894	0.00140225								14	RPS26	-0.972776	0.0171231
14	MT-CYB	2.22031	0.001639								14	RPL19	-0.758124	0.0171231
14	MT-ND2	1.72924	0.00170257								14	GNLY	-2.91757	0.0188274
14	MT-CO3	2.55533	0.00183567								14	RPLP1	-0.726455	0.023064
14	HLA-DRB1	1.98997	0.00267845								14	TMPO	-3.42965	0.0244175
14	MT-ATP6	1.8581	0.00286179								14	MRPL27	-4.53722	0.0268155
14	MTRNR2L12	2.7526	0.00302631								14	COX8A	-1.56353	0.0271918
14	MT-ND1	1.54479	0.00397805								14	IL32	-1.57264	0.0282073
14	CD74	1.28901	0.00408615								14	TNIK	-3.00961	0.0314022
14	MT-ND3	1.46195	0.00442135								14	GMFG	-1.39614	0.0330918
14	MT-ND4L	2.4382	0.00477634								14	BLVRB	-2.20168	0.0348436
14	ANXA1	1.78635	0.00503604								14	MYL6	-0.846392	0.0414404
14	HLA-DPA1	1.68449	0.0061978								14	TRAV12-3	-13.771	0.0415927
14	HLA-DQB1	2.14336	0.00686332								14	GIMAP4	-2.42177	0.0472629
14	ANXA2	1.56392	0.00686761								14	CCL5	-1.55893	0.0475748
14	MT-ND4	1.56994	0.00868254								2	AC100781.1	-5.14046	2.09912e-18
14	MT-ND5	2.43112	0.0116693								2	ABHD2	-0.963976	1.49385e-08
14	HLA-DRB5	1.82525	0.0126713								2	DNAH11	-0.630004	3.80237e-07
14	HSP90AA1	1.53388	0.0208797								2	MTSS1	-1.01727	1.24616e-06
14	MT-ATP8	2.33014	0.0273721								2	EYA2	-1.05637	1.76014e-06
14	VIM	1.21037	0.0280795								2	LKAAEAR1	-2.59451	4.88323e-06
14	MT-CO2	1.58472	0.0352057								2	SDK1	-0.641716	5.5064e-06
14	FOS	0.996836	0.0375977								2	FABP6	-1.32654	1.17394e-05
14	UBC	1.12389	0.0456345								2	TACC2	-0.855635	1.34672e-05
14	NFKBIA	2.47998	0.0469856								2	CAMK1D	-0.61201	2.20547e-05
2	HLA-A	0.678784	4.56463e-06								2	SULT1A1	-1.35821	3.39605e-05
2	COL28A1	1.62767	1.02425e-05								2	CROCC	-0.614982	3.67219e-05
2	ABCA13	0.610536	2.00746e-05								2	AL445584.2	-1.57383	5.13956e-05
2	HSP90AA1	0.598442	2.72618e-05								2	SULT2B1	-2.83358	7.92118e-05
2	BPIFB1	1.91556	3.93914e-05								2	AC008014.1	-0.771433	9.92882e-05
2	SARAF	0.75356	5.03805e-05								2	CCDC81	-0.982097	0.000115233
2	HSPA8	0.796925	8.21377e-05								2	NWD1	-0.615197	0.000127809
2	COTL1	5.9196	8.21629e-05								2	LMO2	-1.11788	0.000232295
2	PIFO	0.591893	0.00059744								2	PPM1H	-0.76086	0.000321157
2	CLU	0.740124	0.000825707								2	CAP2	-0.704719	0.000446096
2	RPS23	0.941381	0.00123197								2	WNT9A	-0.89406	0.000527012
2	TAGLN2	1.12064	0.00151773								2	TTLL10	-0.733202	0.000669361
2	DDT	1.09892	0.00305381								2	GRAMD2A	-1.74153	0.00108736
2	RPL5	0.992595	0.00447856								2	UBE2H	-0.696025	0.00157871
2	RPL23A	0.726657	0.00686426								2	SSH2	-0.858229	0.00158563
2	RPL4	0.812177	0.00953606								2	MACROD2	-0.831865	0.00168625
2	RPS3A	0.88296	0.0100179								2	KIAA0556	-0.685607	0.00190963
2	SRP9	0.851279	0.0137322								2	COBL	-0.784301	0.00194085
2	FTH1	0.627913	0.0159928								2	AGAP1	-0.695899	0.00273469
2	RPL26	0.886084	0.0168423								2	SNED1	-0.821493	0.00292101
2	RPL11	0.666649	0.020206								2	AUTS2	-0.713135	0.00373247
2	C11orf58	0.814763	0.0219561								2	VSTM2L	-0.787886	0.00384607
2	ATP5F1B	0.718991	0.033671								2	CHST6	-0.852248	0.0041257
2	RPS27	0.665848	0.0364882								2	LMTK3	-2.14065	0.00453778
2	ACTR3	1.1364	0.0375267								2	MT-ATP8	-0.617205	0.00455475
2	PSMB6	0.949392	0.0385057								2	LINC00964	-1.68064	0.00494832
2	RPS15A	0.769811	0.0390128								2	PDE4D	-0.718251	0.00615055
5	ACTB	1.10809	3.60469e-06								2	AL354754.1	-1.01124	0.00807861
6	COL28A1	3.70319	6.04925e-16								2	SIPA1L1	-0.747288	0.0097218
6	HSP90AA1	0.795756	3.92747e-12								2	ADD3	-0.74593	0.0111184
6	MT-ND2	0.754775	8.83383e-08								2	DPH6	-1.11478	0.0120038
6	NELL2	2.76265	4.43423e-07								2	SMYD3	-0.692319	0.0131158
6	HLA-A	0.836158	5.79226e-07								2	ARHGEF28	-0.617716	0.0145481
6	OXTR	1.93014	1.20082e-06								2	ZDHHC11B	-0.922868	0.0148162
6	HSP90AB1	0.635916	1.76307e-06								2	CLIC6	-0.77838	0.0165882
6	ANKRD66	0.913467	2.84538e-06								2	TSHZ2	-0.738993	0.0175654
6	HSPH1	0.82181	1.3655e-05								2	WIPI1	-1.24948	0.0182309
6	C2orf40	0.952932	1.42882e-05								2	CAPN9	-0.974931	0.0278594
6	DYNC2LI1	1.16064	1.8927e-05								2	ARFGEF3	-0.603444	0.0323313
6	GSTA1	0.728171	5.51618e-05								2	MCTP2	-1.35975	0.0352013
6	MT-ND3	0.803758	5.6135e-05								2	ZSWIM6	-0.765137	0.0375945
6	GPR162	0.767129	7.46999e-05								2	DUOX1	-0.665335	0.0469124
6	TIMP4	2.30499	8.2811e-05								4	AC100781.1	-13.5091	2.36959e-09
6	AC113349.1	1.05158	0.000256174								4	LYSMD1	-11.7196	4.32056e-05
6	SLC22A16	2.18692	0.00042951								4	AL133367.1	-4.87684	0.0068819
6	MT-ND1	0.615296	0.000661326								4	FUK	-4.11811	0.0180267
6	PTGES3	0.602179	0.00379805								4	RLN1	-5.55297	0.0274401
6	RND2	3.12008	0.00450399								4	DSCAM	-5.47033	0.0274401
6	HTRA1	3.15458	0.00602321								4	LINC02145	-6.15722	0.0387798
6	METRN	0.809554	0.0112909								4	SH3RF2	-5.43595	0.0387798
6	LINC02231	2.216	0.0176257								5	PLTP	-5.80798	1.01639e-05
6	AL121899.1	0.929694	0.0215143								5	AC100781.1	-6.59112	0.000323199
6	LAPTM4A	0.732652	0.0238714								5	KRT23	-2.39056	0.000818399
6	HNRNPA3	0.71132	0.0350496								5	MTSS1	-2.03273	0.000948498
6	COTL1	2.42347	0.0415455								5	C1orf194	-0.753284	0.00320004
											5	FABP6	-1.78639	0.00334252
											5	CHST6	-2.08282	0.00429251
											5	LKAAEAR1	-2.99769	0.00518143
											5	CST6	-2.35006	0.00700356
											5	LINC01170	-1.87201	0.00767171
											5	TAPBP	-1.82912	0.0141463
											5	TACC2	-1.6654	0.0144035
											5	STK11IP	-2.77815	0.0175484
											5	MUC16	-1.44257	0.0202433
											5	AUTS2	-2.2867	0.0248888
											6	AC100781.1	-6.78853	4.49632e-17
											6	SULT2B1	-2.99451	2.00057e-11
											6	CARS	-1.43035	2.55709e-11
											6	CLDN3	-1.26321	9.69765e-11
											6	GSTP1	-0.5953	1.01489e-10
											6	ABLIM1	-1.7883	5.94968e-10
											6	AL357093.2	-1.14263	2.90545e-09
											6	TSHZ2	-1.63278	3.5474e-08
											6	WIPI1	-1.78267	1.19862e-07
											6	UBE2H	-0.862138	1.54837e-07
											6	DUSP1	-1.86333	1.71693e-07
											6	SULT1A1	-1.49139	6.5036e-07
											6	GADD45B	-2.4202	7.85364e-07
											6	BEST4	-1.4894	9.52572e-07
											6	CFD	-3.06075	1.04246e-06
											6	RRAD	-1.02072	1.15938e-06
											6	CTSD	-1.04815	1.19519e-06
											6	CLDN4	-1.23577	1.2748e-06
											6	LMTK3	-3.03776	1.27551e-06
											6	S100A13	-1.11376	1.42775e-06
											6	DNAH11	-0.768857	1.9566e-06
											6	TACC2	-1.09495	1.99707e-06
											6	JUNB	-2.17708	2.3334e-06
											6	FOS	-2.34607	2.39314e-06
											6	PDE4D	-1.21193	3.20625e-06
											6	TMPRSS4	-1.91266	5.05199e-06
											6	ZFP36	-2.18766	6.44167e-06
											6	GDF15	-2.5784	6.61759e-06
											6	CAPN2	-0.883258	1.13559e-05
											6	HSPA1B	-1.35518	1.82401e-05
											6	RAB11FIP1	-0.955745	1.91726e-05
											6	KLF6	-1.69971	2.32855e-05
											6	PSCA	-1.04044	2.58955e-05
											6	JUN	-1.77264	4.101e-05
											6	LINC00964	-2.52166	5.01639e-05
											6	AC004556.1	-5.99492	6.70239e-05
											6	ELF3	-0.925883	8.3715e-05
											6	SMYD3	-0.884863	9.38623e-05
											6	RASEF	-1.2187	0.000103256
											6	ABHD2	-0.782584	0.000108332
											6	DCXR	-1.75868	0.000112935
											6	ETS2	-1.89964	0.000123834
											6	AHNAK2	-1.55123	0.000124696
											6	CCDC80	-1.29218	0.000151752
											6	ACTN4	-0.935557	0.000184544
											6	MUC16	-0.89156	0.000190202
											6	ATF3	-1.5065	0.00026556
											6	PPP1R16B	-2.58281	0.000284951
											6	CHST9	-0.622336	0.000347845
											6	CEBPD	-1.0052	0.000358602
											6	IER2	-2.15427	0.000451883
											6	TP53I3	-2.28278	0.000458271
											6	NCOA7	-2.10819	0.000586081
											6	LKAAEAR1	-2.7244	0.00062677
											6	AQP4-AS1	-1.1391	0.0006469
											6	ZBTB16	-2.2222	0.000720647
											6	FOSB	-3.22944	0.000850477
											6	SORD	-1.80517	0.000889399
											6	CYP4B1	-0.743018	0.000929933
											6	PKIB	-1.13999	0.000931212
											6	PPL	-1.80295	0.00113293
											6	SDK1	-0.731809	0.00147984
											6	CHST6	-1.05453	0.0015339
											6	PAPSS1	-1.01278	0.0017391
											6	HES1	-2.17975	0.00175488
											6	EFNA1	-2.93956	0.00186624
											6	FKBP5	-2.38332	0.00208054
											6	SHROOM3	-0.907354	0.00230149
											6	TMEM238	-0.830698	0.00242671
											6	SRD5A1	-1.75753	0.0026506
											6	STARD10	-0.858455	0.00292927
											6	PIM3	-1.51645	0.00298749
											6	ARHGEF28	-0.859007	0.00333579
											6	SOCS3	-3.51687	0.0040243
											6	SRGAP3-AS2	-0.792548	0.00536724
											6	EGR1	-2.32347	0.00567772
											6	IFITM10	-2.17934	0.00570471
											6	ACADVL	-0.928357	0.00687329
											6	CELF2	-2.82593	0.00743991
											6	TRIM2	-0.694426	0.00763355
											6	ETV6	-0.790868	0.00790137
											6	C3orf52	-1.41191	0.0084279
											6	NUPR1	-0.670253	0.00959177
											6	PDK4	-1.97716	0.00961311
											6	CCNL1	-1.32687	0.0104826
											6	GADD45G	-1.35339	0.0124767
											6	SYT8	-2.01194	0.0139687
											6	ABHD12B	-1.16485	0.0146771
											6	ISYNA1	-0.838425	0.0155432
											6	ANK3	-0.612009	0.0159275
											6	BTG2	-1.59299	0.016697
											6	KRT19	-0.675786	0.0184464
											6	AL445584.2	-2.10598	0.0189319
											6	ACOX3	-1.32909	0.0206101
											6	CRIP1	-0.618229	0.0218537
											6	SLC25A25	-2.10848	0.0230463
											6	CHPT1	-2.53408	0.0233855
											6	OSBPL3	-0.988289	0.0243043
											6	LINC02066	-1.57448	0.0261355
											6	INPP4B	-1.70534	0.0267006
											6	ADAMTS17	-5.02776	0.0311375
											6	KRT7	-2.45736	0.0342488
											6	MLX	-1.44544	0.0363367
											6	TTLL10	-0.631534	0.0488281
											6	CCND3	-1.31691	0.0489979
											7	AC100781.1	-6.0644	1.01971e-07
											7	IFITM10	-4.85062	6.73212e-07
											7	NTN1	-2.22394	3.99407e-05
											7	CBR1	-2.34641	6.2054e-05
											7	HAUS1	-2.51764	8.38245e-05
											7	LINC00592	-6.58745	0.000250219
											7	FABP6	-1.95538	0.000326464
											7	CADPS2	-2.73207	0.000502957
											7	SULT2B1	-4.32487	0.000530094
											7	SLC29A1	-2.17513	0.000907015
											7	RCBTB2	-2.54619	0.00121766
											7	AC012485.2	-4.68867	0.0013228
											7	CRYM	-3.34918	0.00209049
											7	CITED4	-1.64831	0.0023098
											7	BAALC	-2.72202	0.00433282
											7	CRTC1	-2.20625	0.00593035
											7	MCF2L	-3.34117	0.00668173
											7	TEFM	-2.60179	0.00681335
											7	THSD4	-2.58234	0.00967386
											7	AC242426.2	-1.6152	0.0103641
											7	ATP8B1	-1.57772	0.0103641
											7	TTC39A	-2.08493	0.01313
											7	ERN2	-2.28842	0.0134748
											7	AC053527.1	-2.62558	0.013822
											7	S100A6	-0.863868	0.0157158
											7	AL357093.2	-1.54405	0.016852
											7	DLG5	-1.18891	0.017668
											7	KMT2B	-1.51285	0.0177263
											7	ZNF431	-2.08772	0.0193971
											7	TMEM38A	-3.8817	0.0249636
											7	LMTK3	-3.62042	0.0261347
											7	ACSF2	-1.96081	0.0276162
											7	CISH	-1.55311	0.0281774
											7	AC244131.2	-3.7724	0.0310186
											7	ABHD2	-1.59187	0.0334736
											7	AC093159.1	-2.96969	0.0413224
											7	MRVI1-AS1	-1.62165	0.0432373
											7	AC084816.1	-2.97812	0.0443725
											7	DLG1	-1.65251	0.0499753

[truncated: 3 more sheets: 11. Epith Cilia Inflam DEG DEP , 12. Mac subtypes BAL DEG DEP , 13. T cell subtype BAL DEG DEP ]
