# Supplementary material for: Distinct Pulmonary Innate and Adaptive Immune Responses during the Initiation and Resolution of Natural and Breakthrough SARS-CoV-2 Infection
Source: Research Square preprint supplement (doi:10.21203/rs.3.rs-7716872/v1), 2025-10-21
Supplement: Supplementary file 3 [file 5dc51a0d783406476493d0a4.xlsx]

## Sheet: 1. Lung Cell Distribution  
a)
Cell Types	Markers	Clusters
Macrophage	CD68,CD14	0,2,3,4,5,6,8,9,10,11,13,16,19,20,31,32,33,34,35
CD4	CD3D,CD4	1,14,17,27
CD8	CD3D,CD8A	7
mDC	CD1C, CLEC9A,TIFAB	12,21,26
NK	KLRD1,TRDC	15
Epithelial	TPPP3, KRT18, WFDC2	18,23,24
B_cell	MS4A1,CD79B	22
Plasma	IGHG4	25
pDC	LILRA4,TIFAB	28
b)
Clusters	0,2,3,4,5,6,8,9,10,11,13,16,19,20,31,32,33,34,35	1,14,17,27	7	12,21,26	15	18,23,24	22	25	28	29	30
Cell Types	Macrophage	CD4	CD8	mDC	NK	Epithelial	B_cell	Plasma	pDC	Mast	unknown
Unvaxed-A	38439	15761	8035	2192	1386	1259	633	975	266	58	25
Vaxed-A	48757	13960	3750	985	650	883	252	137	112	40	3
Unvaxed-R	52527	4532	1721	1120	377	181	510	20	69	43	38
Vaxed-R	57218	5121	1916	963	267	429	183	9	58	18	2
Unvaxed-C	4313	1087	185	78	52	9	9	1	12	8	1
Vaxed-C	8953	531	201	268	53	4	12	0	2	0	1
HC	24578	1319	576	554	54	1994	51	1	17	41	4
Clusters	0	1	2	3	4	5	6	7	8	9	10	11	12	13	14	15	16	17	18	19	20	21	22	23	24	25	26	27	28	29	30	31	32	33	34	35
UV-A	8283	13420	5743	3932	3312	5935	5447	8035	1304	492	933	1383	1320	465	1334	1386	443	807	929	378	383	680	633	330	0	975	192	200	266	58	25	3	2	0	1	0
V-A	13375	12185	6773	6717	7106	4898	3289	3750	1371	795	1055	1207	584	684	822	650	614	751	719	463	408	277	252	163	1	137	124	202	112	40	3	1	0	1	0	0
UV-R	14538	3699	9474	6566	7379	4961	2855	1721	1393	645	1446	919	590	703	275	377	515	497	144	598	483	366	510	37	0	20	164	61	69	43	38	50	0	1	0	1
V-R	14376	4457	9256	9295	7753	4627	3924	1916	1963	773	1571	1022	555	924	308	267	568	264	143	535	628	282	183	286	0	9	126	92	58	18	2	1	0	0	1	1
UV-C	1020	960	725	640	731	417	253	185	189	26	81	54	36	51	23	52	52	90	9	50	24	28	9	0	0	1	14	14	12	8	1	0	0	0	0	0
V-C	2351	454	1637	1670	991	549	748	201	198	214	200	72	185	139	41	53	73	32	4	59	52	29	12	0	0	0	54	4	2	0	1	0	0	0	0	0
HC	6138	846	1663	5158	2815	1919	1716	576	966	2831	239	172	416	564	361	54	306	93	345	14	76	78	51	439	1210	1	60	19	17	41	4	1	0	0	0	0

## Sheet: 2 Epithelium Distribution  
a)
Cell Types	Markers	Clusters
AT2	SFTPC, SFTA2, SFTPD,	12
Basal	KRT5,AQP3, SPARCL1,SERPINB4,TP63,	13
Ciliated	CAPS,TPPP3,RSPH1,PIFO,SNTN	0,1,2,4,5,6,7,8,9,11
Inflammatory	APOC1,C1OB,APOE,LYZ,ACP5,HAL-DRB1	10,14,15,16
Ionocyte	FOXI,CLCNKB,ASCL3,RARRES2,STAP1	17
Secretory	BPIFB1,MUC5AC,MSMB,SCGB1A1,SCGB3A1,MUC5B	3
Squamous(KRT13)	KRT13,KRT4,MAL,ECM1,	11
b)
Clusters	3	13	0,1,2,4,5,6,7,8,9	11	10,14,15,16	12	17
Cell Types	Secretory	Basal	Ciliated	Squamous (KRT13)	Inflammatory	AT2	Ionocyte
Unvaxed-A	2	102	811	1	140	66	18
Vaxed-A	16	15	513	1	86	60	8
Unvaxed-R	1	1	65	0	59	5	0
Vaxed-R	0	12	232	7	74	5	2
HC	385	0	1252	3	26	11	0
Total	404	130	2873	12	385	147	28
Percentage (%)	10.15	3.27	72.2	0.3	9.67	3.69	0.7
c)
Cell Types	Secretory	Basal	Ciliated	Squamous (KRT13)	Inflammatory	AT2	Ionocyte
G1	185	72	277	8	136	93	10
G2M	63	11	1999	4	129	30	4
S	156	47	597	0	120	24	14

## Sheet: 3. Macrophage Distribution
a)
Cell Type	Markers	Clusters	Phenotype
Alveolar_Mac	FABP4,CD68,MRC1	0,4,8,11,15,33	Alveolar Macrophage
Mac_proliferation	TK1,STMN1,MKI67,UBE2S,H1FX, HMGN2	12,18,19,25,27	Proliferative
Mac_CSF1R	CSF1R,FCGR2B,CCL2,CCL3,SPP1	9
Mac_IL1B	IL1B,CCL3,CCL4,ICAM1	14,32	Pro-inflammatory
Mac_TCR	IL32,CD2,CD3E,CCL5	10,23,29
Mac_IFIT1	IFIT1,IFIT2,ISG15,MX1	17	IFN-activated
Mac_GBP1	CXCL9,CXCL10,GBP1,	16,30
Mac_MSMO1	MSMO1,INSIG1,FDFT1	3	Lipid Metabolizing
Mac_BEST1	BEST1,AL138963.3	21	Monocyte Marker
Mac_CDR1	CDR1,AL078639.1	22
Mac_VCAN	VCAN,FCN1	7	Tissue Remodeling
Mac_SPP1	SPP1,CHIT1	24,28
Mac_ACSL1	ACSL1,SOD2,PLIN2,CTSL	31
Mac_CCL18	CCL18,RBP4,CA2	2	Anti-inflammatory
Mac_CCL2	CCL2,FCGR2B	26	Pro-migratory
Mac_HLA-	HLA-ABC_neg,CD11c_neg,CD31_neg	5	Immunosupressive
Mac_RHOB	RHOB,FOS,JUN	1	Stress Responsive
Mac_NURP1	NUPR1,SCD	6
Mac_NEAT1	NEAT1,LRMDA	13
Mac_MT1G	MT1G,MT1X	20
b)
Clusters	0,4,8,11,15,33	1	2	3	5	6	7	9	10,23,29	12,18,19,25,27	13	14,32	16,30	17	20	21	22	24	26	31
Cell Types	Alveolar_Mac	Mac_RHOB	Mac_CCL18	Mac_MSMO1	Mac_HLA-ve	Mac_NURP1	Mac_VCAN	Mac_CSF1R	Mac_TCR	Mac_Proliferation	Mac_NEAT1	Mac_IL1B	Mac_GBP1	Mac_IFIT1	Mac_MT1G	Mac_BEST1	Mac_CDR1	Mac_SPP1	Mac_CCL2	Mac_ACSL1
Unvaxed-A	10964	3699	2900	2200	4063	933	2411	2109	3163	1989	313	735	580	445	356	667	290	310	312	0
Vaxed-A	17289	4508	4949	4761	2585	1795	2442	1572	2276	2229	658	736	666	712	522	358	349	340	9	1
Unvaxed-R	18419	6868	5327	5580	1828	1296	2744	1500	1378	3101	481	891	659	693	522	478	478	253	31	0
Vaxed-R	18263	6566	6390	5599	2515	3450	2560	1438	1012	3677	542	1082	1103	801	723	817	377	261	10	32
Unvaxed-C	9430	870	1269	1273	706	3779	805	622	523	508	2729	744	315	387	403	40	8	156	10	1
Vaxed-C	3158	1227	1328	628	530	413	307	190	92	369	90	161	54	122	96	89	38	60	1	0
HC	9430	870	1269	1273	706	3779	805	622	523	508	2729	744	315	387	403	40	8	156	10	1
c)
Clusters	0	1	2	3	4	5	6	7	8	9	10	11	12	13	14	15	16	17	18	19	20	21	22	23	24	25	26	27	28	29	30	31	32	33
UV-A	6858	3699	2900	2200	2431	4063	933	2411	930	2109	2331	576	782	313	711	168	579	445	473	480	356	667	290	817	220	249	312	5	90	15	1	0	24	1
V-A	11064	4508	4949	4761	3401	2585	1795	2442	1911	1572	1631	313	950	658	736	599	665	712	578	581	522	358	349	644	338	58	9	62	2	1	1	1	0	1
UV-R	12111	6868	5327	5580	4446	1828	1296	2744	1396	1500	1349	188	1439	481	891	278	609	693	721	767	522	478	478	27	253	144	31	30	0	2	50	0	0	0
V-R	11619	6566	6390	5599	3771	2515	3450	2560	2171	1438	959	287	1595	542	1082	415	1103	801	935	874	723	817	377	12	260	183	10	90	1	41	0	32	0	0
UV-C	764	505	460	527	297	208	150	249	147	94	272	6	80	17	59	70	109	63	48	45	40	27	33	10	31	1	1	0	0	0	0	0	0	0
V-C	1647	1227	1328	628	771	530	413	307	359	190	89	50	213	90	161	331	54	122	87	69	96	89	38	3	60	0	1	0	0	0	0	0	0	0
HC	2548	870	1269	1273	781	706	3779	805	731	622	513	3958	212	2729	744	1412	315	387	133	151	403	40	8	10	155	11	10	1	1	0	0	1	0	0

## Sheet: 4. Lymphocyte Distribution
a)
Cell Types	Cell Markers	Cluster
CD40LG+CD4+_EM	S100A4,TXN,ANXA1,LGALS3,RBPJ,CD40LG,CXCR6	0
CD4+_N	TCR7,CCR7,LEF1,CD4	1
CD8_RM	ZNF683,ITGAE,XCL1,CCL5,XCL2,CD8A	2
CD4_Th1	TBX2,RUNX3	3,5
BBC3_T	BBC3,RPS27L,CEBPB,TXNIP,S100A11	4
BCL2_T	BCL2,ANK3,ATXN1,THEMIS,CHST11,CDC14A	6
CD8_EM	GZMK,GZMH,GZMM	7
CD4_Treg	FOXP3,IL2RA,IKZF2,TNFRSF4	8
CD8_EX	GZMA,GNLY,GZMB,IFNG	9,19
NK_Cyto	GNLY,FCER1G,CTSW,XCL2,GZMB,KLRD1,TRDC	10
CD8_gdT	TRDC,TRGC2,TRG-AS1,TRDV1,KIR3DL2	11
CD4_SCM	IL7R,CCR7,TCF7,FAS,CD27,CD28	12
NK_rest	GNLY,FCER1G,CTSW,XCL2,GZMB,KLRD1,TRDC	13
CD4_ISAG	ISG15,IFI6,MX1,IFI44L,HERC5,OAS1,IFIT1,STAT1	14
CD8_N	TCR7,CCR7,LEF1,CD8A	15
CD8_MAIT	SLC4A10,PRSS35,CCR6,TRDV2	16
CD4_APOC1	APOC1,FTL,C1QA,CST3	17
CD4_Cycling	STMN1,MKI67,HMGB2,CDT1	18
CD_4	CD4	20
b)
Clusters	13	10	2	15	16	11	9,19	7	0	1	8	3,5	12	14	18	17	20	6	4
Cell Types	NK_Rest	NK_Cyto	CD8+RM	CD8+N	CD8+MAIT	CD8+gdT	CD8+EX	CD8+EM	CD40LG+	CD4+N	CD4+Treg	CD4+Th1	CD4+SCM	CD4+	CD4+Cycling	CD4+APOC1	CD4+	BCL2+T Cell	BBC3+T Cell
Unvaxed-A	402	1209	1946	583	329	464	2769	1338	3550	3083	759	4622	767	301	206	238	14	1504	1098
Vaxed-A	416	284	1539	336	410	311	54	731	3890	2484	673	3397	488	571	218	214	0	834	1510
Unvaxed-R	175	270	647	97	171	135	23	356	1631	1054	533	419	13	90	55	109	0	258	594
Vaxed-R	175	136	758	106	94	207	10	473	2619	840	259	334	4	149	88	112	0	297	643
Unvaxed-C	41	21	64	27	39	10	2	28	512	203	85	102	0	60	12	22	0	26	70
Vaxed-C	36	29	48	22	24	31	0	19	194	134	24	50	1	9	4	24	0	21	115
HC	30	32	250	13	72	141	1	42	366	215	86	72	2	18	20	260	0	142	187
